# Supplementary material for: Concurrent use of opioids and benzodiazepines/Z-drugs in Alberta, Canada and the risk of hospitalisation and death: a case cross-over study
Source: PubMed Central journal article supplement — BMJ Open. 2020 Nov 20;10(11):e038692. doi: 10.1136/bmjopen-2020-038692 (PMC7682464; doi:10.1136/bmjopen-2020-038692), 2020-11-20
Supplement: bmjopen-2020-038692.draft_revisions.pdf [file bmjopen-2020-038692.draft_revisions.pdf]

# BMJ Open

BMJ Open is committed to open peer review. As part of this commitment we make the peer review history of every article we publish publicly available.

When an article is published we post the peer reviewers' comments and the authors' responses online. We also post the versions of the paper that were used during peer review. These are the versions that the peer review comments apply to.

The versions of the paper that follow are the versions that were submitted during the peer review process. They are not the versions of record or the final published versions. They should not be cited or distributed as the published version of this manuscript.

BMJ Open is an open access journal and the full, final, typeset and author-corrected version of record of the manuscript is available on our site with no access controls, subscription charges or pay-per-view fees (<http://bmjopen.bmj.com>).

If you have any questions on BMJ Open's open peer review process please email [info.bmjopen@bmj.com](mailto:info.bmjopen@bmj.com)

# BMJ Open

## Concurrent use of opioids and benzodiazepines/Z-drugs increases the risk of hospitalization and death: case crossover study

|                               |                                                                                                                                                                                                                                                                                                                                         |
|-------------------------------|-----------------------------------------------------------------------------------------------------------------------------------------------------------------------------------------------------------------------------------------------------------------------------------------------------------------------------------------|
| Journal:                      | <i>BMJ Open</i>                                                                                                                                                                                                                                                                                                                         |
| Manuscript ID                 | bmjopen-2020-038692                                                                                                                                                                                                                                                                                                                     |
| Article Type:                 | Original research                                                                                                                                                                                                                                                                                                                       |
| Date Submitted by the Author: | 20-Mar-2020                                                                                                                                                                                                                                                                                                                             |
| Complete List of Authors:     | Sharma, Vishal; University of Alberta, School of Public Health<br>Simpson, Scot H.; University of Alberta, Faculty of Pharmacy and Pharmaceutical Sciences<br>Samanani, Salim; Okaki Health Intelligence,<br>Jess, Ed; The College of Physicians & Surgeons of Alberta,<br>Eurich, Dean; University of Alberta, School of Public Health |
| Keywords:                     | EPIDEMIOLOGY, PUBLIC HEALTH, Substance misuse < PSYCHIATRY, PAIN MANAGEMENT                                                                                                                                                                                                                                                             |
|                               |                                                                                                                                                                                                                                                                                                                                         |

SCHOLARONE™  
Manuscripts

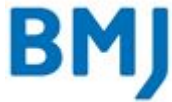

I, the Submitting Author has the right to grant and does grant on behalf of all authors of the Work (as defined in the below author licence), an exclusive licence and/or a non-exclusive licence for contributions from authors who are: i) UK Crown employees; ii) where BMJ has agreed a CC-BY licence shall apply, and/or iii) in accordance with the terms applicable for US Federal Government officers or employees acting as part of their official duties; on a worldwide, perpetual, irrevocable, royalty-free basis to BMJ Publishing Group Ltd ("BMJ") its licensees and where the relevant Journal is co-owned by BMJ to the co-owners of the Journal, to publish the Work in this journal and any other BMJ products and to exploit all rights, as set out in our [licence](#).

The Submitting Author accepts and understands that any supply made under these terms is made by BMJ to the Submitting Author unless you are acting as an employee on behalf of your employer or a postgraduate student of an affiliated institution which is paying any applicable article publishing charge ("APC") for Open Access articles. Where the Submitting Author wishes to make the Work available on an Open Access basis (and intends to pay the relevant APC), the terms of reuse of such Open Access shall be governed by a Creative Commons licence – details of these licences and which [Creative Commons](#) licence will apply to this Work are set out in our licence referred to above.

Other than as permitted in any relevant BMJ Author's Self Archiving Policies, I confirm this Work has not been accepted for publication elsewhere, is not being considered for publication elsewhere and does not duplicate material already published. I confirm all authors consent to publication of this Work and authorise the granting of this licence.

# Concurrent use of opioids and benzodiazepines/Z-drugs increases the risk of hospitalization and death: case crossover study

Vishal Sharma (0000-0001-7907-1183), Scot Simpson (0000-0002-9880-2129), Salim Samanani (0000-0001-6751-4805), Ed Jess, Dean Eurich (0000-0003-2197-0463)

## **Address for each author**

2-040 Li Ka Shing Center for Health Research Innovation, School of Public Health, University of Alberta, Edmonton, Alberta, Canada, T6G 2E1 [Vishal Sharma BPharm PhD Candidate](#), Faculty of Pharmacy and Pharmaceutical Sciences, University of Alberta, Edmonton, Alberta, Canada, T6G 2E1 [Scot Simpson professor](#), OKAKI Health intelligence, Calgary, Alberta, Canada Salim Samanani CEO and Medical Director OKAKI, The College of Physicians & Surgeons of Alberta, Edmonton, Alberta, Canada, T5J 0N3 Ed Jess Director of Prescribing & Analytics, 2-040 Li Ka Shing Center for Health Research Innovation, School of Public Health, University of Alberta, Edmonton, Alberta, Canada, T6G 2E1 Dean Eurich professor

## **Corresponding Author:**

Dean Eurich, 2-040 Li Ka Shing Center for Health Research Innovation, University of Alberta, Edmonton, Alberta, Canada, T6G 2E1; Phone 780-492-6333; fax 780-492-7455; email: [deurich@ualberta.ca](mailto:deurich@ualberta.ca)

## **Acknowledgement**

This study is based on data provided by The Alberta Strategy for Patient Orientated Research (ABSPOR) SUPPORT unit and Alberta Health. The interpretation and conclusions contained herein are those of the researchers and do not necessarily represent the views of the Government of Alberta, ABSPOR or the College of Physicians & Surgeons of Alberta (CPSA). Neither the Government of Alberta, ABSPOR, Alberta Health nor the CPSA expresses any opinion in relation to this study. This work was supported by Mitacs through the Mitacs Accelerate Program and the College of Physicians & Surgeons of Alberta.

1  
2  
3 **Contributors:** VS DE SS were involved in the conception and design of the study. VS and DE  
4 analyzed the data. VS and DE drafted the article. EJ SS and SS revised the article. All authors  
5 gave final approval of the version to be published. The corresponding author attests that all  
6 listed authors meet authorship criteria and that no others meeting the criteria have been omitted.  
7 DE is the guarantor.  
8

9  
10 **Funding:** This study received no funding.  
11

12 **Copyright/license for publication:** *The Corresponding Author has the right to grant on behalf*  
13 *of all authors and does grant on behalf of all authors, a worldwide licence to the Publishers and*  
14 *its licensees in perpetuity, in all forms, formats and media (whether known now or created in the*  
15 *future), to i) publish, reproduce, distribute, display and store the Contribution, ii) translate the*  
16 *Contribution into other languages, create adaptations, reprints, include within collections and*  
17 *create summaries, extracts and/or, abstracts of the Contribution, iii) create any other derivative*  
18 *work(s) based on the Contribution, iv) to exploit all subsidiary rights in the Contribution, v) the*  
19 *inclusion of electronic links from the Contribution to third party material where-ever it may be*  
20 *located; and, vi) licence any third party to do any or all of the above.*  
21  
22

23  
24 **Competing Interest:** *All authors have completed the ICMJE uniform disclosure form at*  
25 *[www.icmje.org/coi\\_disclosure.pdf](http://www.icmje.org/coi_disclosure.pdf) and declare: no support from any organisation for the*  
26 *submitted work; Salim Samanani has received research grants from the College of*  
27 *Physicians & Surgeons of Alberta; no other relationships or activities that could appear*  
28 *to have influenced the submitted work.*  
29  
30  
31

32  
33  
34 **Ethical approval:** This study was approved by the health ethics research board at the University  
35 of Alberta (#Pro00083807).  
36

37 **Data Sharing:** The data used in this study is not available for external analysis. However,  
38 administrative health data can be accessed from AH by following defined research protocols and  
39 confidentiality agreements.  
40

41  
42 **Transparency:** The lead author (the manuscript's guarantor) affirms that the manuscript is an  
43 honest, accurate, and transparent account of the study being reported; that no important aspects  
44 of the study have been omitted; and that any discrepancies from the study as originally planned  
45 (and, if relevant, registered) have been explained.  
46

47 **Word Count: 2629**  
48

49  
50 **Summary box:**

51  
52 **Section 1: What is already known on this topic**

- 53 • Co-prescribing opioids and benzodiazepines is associated with increased risk of  
54 hospitalization and death.  
55  
56

- Many clinical guidelines on safe opioid prescribing warn against co-prescribing of opioids and benzodiazepines.
- Although concurrent use of opioids and benzodiazepines has been studied in the USA among US Veterans and the privately insured population, risk of concurrent use has not been estimated in a more general population among various sub-groups of patients in Alberta, Canada.

## **Section 2: What this study adds**

- Risk of hospitalization, emergency visit or death is associated with concurrent use of opioids and benzodiazepines compared to opioid only use in the general population in Alberta, Canada
- This higher estimated risk is associated with older adults, those with mental health issues, chronic opioid users and higher users of the health care system.
- Higher risk of concurrent use on hospitalization, emergency visit or death was observed with any opioid molecule that was prescribed at any dose.

## Abstract

**Objectives:** In Canada, co-prescribing of benzodiazepines/Z-drugs (BZDs) and opioids is a less highlighted drug-use pattern of considerable concern due to risk of adverse events. The objective of this study is to estimate the effect of concurrent use of BZDs on the risk of hospitalizations/emergency department (ED) visits and deaths among opioid users.

**Design, Setting and Participants:** We conducted a population-based case crossover study during 2016-2018 involving Albertans 18 and over who received opioids. Of these patients, we included those who were hospitalized, visited the ED, or died.

**Intervention:** Concurrent use of opioids and BZDs.

**Outcomes:** We estimated the risk of incident all-cause hospitalization/ED visits and all-cause mortality associated with concurrent BZD use by applying a matched-pair analyses comparing concurrent use to opioid only use.

**Results:** 17% of opioid users (179,805/1,056,773) concurrently used a BZD. Overall, concurrent use was associated with higher risk of hospitalization/ED visit (OR 1.13,  $P<0.001$ ) and all cause death (OR 1.90;  $P<0.001$ ). The estimated risk of hospitalization/ED visit was highest in those  $>65$  (OR 1.5;  $P<0.001$ ), higher health care utilization (OR 1.67;  $P<0.001$ ) and  $>365$  days of opioid use (OR 1.76;  $P<0.001$ ). Events due to mental health and opioid toxicity were also associated with concurrent use (OR 1.8;  $P<0.001$ ). Opioid dose-response effects among concurrent patients who died were also noted (OR 3.13;  $P<0.001$ ).

**Interpretation:** Concurrent use of opioids and BZDs further contributes to the risk of hospitalization/ED visits and mortality in Alberta, Canada over opioid use alone, with higher opioid doses, age and healthcare utilization carrying higher risks. Regulatory bodies and health providers should reinforce safe drug-use practices and be vigilant about co-prescribing.

### Strengths and Limitations

- The use of a large population-based sample with near complete capture of all opioid and benzodiazepine dispensations from community pharmacies in Alberta,
- The case crossover methodology is a good fit for studies in pharmacoepidemiology like ours since the effect of many confounders can be substantially controlled,
- We considered patient sub-groups that have not previously been studied with respect to concurrent use of opioids and benzodiazepines.
- We assumed that patients took their medications as prescribed and recorded in the administrative data set. This is a limitation for all studies using administrative data,
- There is always residual confounding and importantly, unknown factors which may have changed between the control and case windows could have affected our results.
- Information on the indication for concurrent prescribing was not available from the administrative database.



## Introduction

Canada has among the highest rates of opioid prescribing in the world and since 1980, the volume of opioids sold to hospitals and pharmacies has increased by 3000% despite increasing recognition of the significant risk associated with such prescribing practices<sup>1-3</sup>. Individuals older than 65 years are especially prone to the consequences of opioids<sup>3,4</sup>. The policy response to the opioid crisis has focused on establishing guidelines for safe and appropriate prescribing of opioids<sup>1,5</sup>. A similar picture exists for benzodiazepines and Z-drugs (zopiclone, zolpidem), collectively known as benzodiazepine receptor modulators (BZDs). BZDs are widely prescribed for anxiety disorders and insomnia<sup>6</sup>. Canadian clinical practice suggest that BZD treatment may be appropriate for short term use only in adults<sup>7,8</sup>. Use of BZDs outside of these recommendations is considered potentially inappropriate given the potential for adverse effects, especially in those over 65<sup>6,7,9,10</sup> years and Canadian data have shown high prevalence of BZD use among the elderly<sup>11,12</sup>. Furthermore, receipt of BZDs could be a marker of mental illness, which carries its own risk of mortality<sup>13,14</sup>.

In the context of the opioid crisis, concurrent use of opioids and BZDs represents a less highlighted drug use pattern that is of substantial concern because of the increased risk of mortality<sup>5,15,16</sup>. Although there are no specific clinical guidelines on indications for concurrent use of opioids and BZDs, there are numerous evidence based recommendations warning against concurrent prescribing of these medications<sup>1,5,17</sup> and previous literature suggests that opioids and BZDs cannot be targeted by safe use policies in isolation<sup>18</sup>. Despite these warnings, opioids and BZDs are still being co-prescribed at alarming rates, as shown in our previous work using Alberta data<sup>19</sup>. Data from the US also show an increasing trend in co-prescribing of opioids and

1  
2  
3 BZDs<sup>15,20,21</sup> and 50% of opioid related deaths in Ontario and Manitoba, Canada involved BZDs  
4  
5 22,23. Furthermore, 2 large studies in the US showed that concurrent use of opioids and BZDs  
6  
7 carried a higher risk of hospital admission and mortality than opioid use alone<sup>15,16</sup>. However,  
8  
9 the Canadian studies did not quantify the risk associated with concurrent use and the two US  
10  
11 studies used populations limited to US military veterans and those that were privately insured,  
12  
13 and may not be generalizable to other populations.  
14  
15

16  
17 To our knowledge, no broad Canadian population-based studies have quantified the effect  
18  
19 of concurrent BZD and opioid use on outcomes such as hospitalizations and mortality using the  
20  
21 characteristics that we and others have identified as relevant<sup>15,16</sup>. Using a case crossover study  
22  
23 design, we aimed to examine the association between concurrent use of opioids and BZDs and  
24  
25 adverse health outcomes and hypothesized that concurrent use would further increase risk of  
26  
27 these outcomes. Our results will help fill an evidence gap on the adverse outcomes associated  
28  
29 with concurrent prescribing of opioids and BZDs.  
30  
31

## 32 33 **Methods**

### 34 35 **Data Sources**

36  
37 Demographic information and dispensation records from community pharmacies were obtained  
38  
39 from Alberta Netcare Pharmaceutical Information Network (PIN). Information on  
40  
41 hospitalizations and ED visits was collected using the Canadian Institute for Health  
42  
43 Information's Discharge Abstract Database and National Ambulatory Care Reporting System.  
44  
45 Physician visits/claims and death records were provided by Alberta Health and Population and  
46  
47 Vital Statistics, respectively. Using anonymized patient level identifiers, these databases were  
48  
49 linked together to establish a complete description of drug exposures and health outcomes. This  
50  
51  
52  
53  
54  
55  
56  
57  
58  
59  
60

1  
2  
3 study was approved by the health ethics research board at the University of Alberta  
4  
5 (#Pro00083807).  
6

### 7 **Identification of Patients and Outcomes**

8  
9  
10 To maximize use of the data, two distinct analysis cohorts were generated. For the  
11  
12 hospitalization and emergency department (ED) analyses, all subjects in Alberta, Canada who  
13  
14 received a dispensation for an opioid between Jan 1, 2016 and Dec 31, 2018, 18 years of age and  
15  
16 over were included. For mortality analyses, all subjects who received a dispensation for an  
17  
18 opioid between Jan 1, 2016 to Dec 31, 2017 were included. This distinction was required as  
19  
20 mortality data was not yet available for 2018 in the province as reporting is 12-24 months  
21  
22 delayed in the province.  
23  
24

25  
26 Our primary outcomes among the cohort of opioid users were all cause, incident  
27  
28 hospitalizations or ED visits during Jan 1, 2016-Dec 31, 2018 (n=1,056,773) and all cause  
29  
30 mortality during Jan 1, 2016 - Dec 31, 2017 (n=31,998). The secondary outcome was incident  
31  
32 hospitalization or ED visit due to ICD-10 diagnoses related to mental health and opioid toxicity  
33  
34 (ICD10 F04-F99, T400-T404, T406) between Jan 1, 2016 and Dec 31, 2018 as these endpoints  
35  
36 maybe more specific to the population using BZD and opioids. The date of the event served as  
37  
38 the index date for all analyses.  
39  
40  
41  
42  
43

### 44 **Exposure**

45  
46 The exposure of interest was whether an opioid patient also used a BZD concurrently during the  
47  
48 study period. We considered “use” as any day on which a patient had a supply of medication on  
49  
50 hand on the basis of the date and days’ supply of each dispensation as others have<sup>15</sup> As  
51  
52 described in our previous work<sup>19</sup>, for each patient, a day was categorized as concurrent if it was  
53  
54 covered by both an opioid and BZD. For every patient in our opioid cohort, each day of follow  
55  
56  
57

up was categorized into one of four mutually exclusive groups of exposures: **1)** neither opioid nor BZD use (none), **2)** opioid only use, **3)** BZD only use and **4)** any concurrent use of opioid and BZD (concurrent).

### **Design and Statistical Analyses**

An opioid user was defined as anyone who received at least 1 dispensation for an opioid and concurrent use was defined as at least 1 day of overlap between an opioid and BZD. Health care utilization was defined by number of unique providers visited and number of opioid prescriptions dispensed.

We used the case-crossover design to estimate if concurrent use increased the risk of our defined outcomes. In a case crossover study, each person serves as their own control; consequently, eliminating confounding due to age, sex and other fixed patient factors<sup>24</sup>. This methodology is increasingly being utilized to evaluate exposures encountered in pharmacoepidemiology and when using administrative databases<sup>24-26</sup>.

Conditional logistic regression was used to contrast the four defined exposure groups in the seven-day risk period immediately before the event with the seven-day control period one month earlier. We chose the one month time period based on other published pharmacoepidemiology studies using this methodology<sup>27</sup>. For each of the defined exposure groups, we estimated the risk of incident hospitalization/ED visits and mortality using odds ratios and their associated 95 percent confidence intervals. The opioid only exposure group was used as the reference group in order to estimate the risk of concurrent use relative to opioid only use. The analyses were stratified into the following sub-groups: sex, age at admission or death, total days of cumulative concurrency prior to event, total days of previous opioid use, health care utilization, opioid molecule and dose (oral morphine equivalents, OME). All analyses were performed using STATA/MP 15.1 (StataCorp., College Station, TX)

## Sensitivity Analyses

We performed the primary analyses on a subset of the population that excluded cancer and palliative patients like others have<sup>16,28</sup> by removing all patients that had relevant ICD codes (ICD9: 140-239, V66.7; ICD10: C00-D49, Z51) at any time between 2012-2018 identified from the above-mentioned databases. We also performed the analyses after adjusting the length of the study windows to 3 and 10 days and adding a second control period that preceded the event by 2 weeks.

## Patient and Public Involvement

This research was done without patient involvement. Patients were not invited to comment on the study design and were not consulted to develop patient relevant outcomes or interpret the results. Patients were not invited to contribute to the writing or editing of this document for readability or accuracy. There are no plans to disseminate the results of the research to study participants.

## Results

There were 1,056,773 patients in Alberta classified as opioid users that were hospitalized or visited the ED during 2016-2018 (Table 1). Among this cohort, 17% (n=179,805) had at least one day of concurrent use with a BZD during follow-up. Similarly, there were 31,998 patients in the death cohort and 34.5% (n=11,055) had at least one day of concurrent use.

## Hospitalizations or ED visits

Compared to opioid only use, concurrent use of opioids and BZDs was associated with an elevated risk of hospitalization or ED visit ((prevalence of exposure to concurrent use in control and case windows, respectively: 2.1% vs. 3.3%); OR 1.13; P<0.001; Table 2). After stratification, those over 65 years of age (3.6% vs. 4.8%; OR 1.5; P<0.001) and those visiting >5

1  
2  
3 health providers (13.0% vs. 16.5%; OR 1.67;  $P < 0.001$ ) had the highest risk associated with  
4 concurrent use and hospitalizations or ED visits. With respect to total days of concurrency  
5 prior to the event, although any duration of concurrency was associated with a substantial  
6 increase in risk, one of the highest risks was observed in those that had concurrent use of less  
7 than a month (1-30 days) (1.4% vs. 5.8%; OR 2.47;  $P < 0.001$ ; Table 2). Not unexpected,  
8 increasing duration of previous use of opioids was also associated with an increasing estimated  
9 risk (Table 2).  
10  
11  
12  
13  
14  
15  
16  
17  
18

19 Among the concurrent patients that were hospitalized or visited an ED, morphine,  
20 oxycodone, hydromorphone and tramadol carried the highest risks when compared to codeine  
21 and used concurrently with BZDs (Figure 1). As expected, there was a dose response effect on  
22 estimated risk where higher OME's had higher risk compared to  $< 50$  OME among concurrent  
23 patients (Figure 1). When specific opioid molecules and OME dose ranges were examined, an  
24 increased risk of hospitalization or ED visit was noted for all opioid molecules and doses when  
25 used concurrently with a BZD (Figure 2).  
26  
27  
28  
29  
30  
31  
32  
33  
34

35 In the secondary analyses, the estimated risk of hospitalization or ED visit was also  
36 substantially higher in concurrent patients when compared to opioid only patients for admissions  
37 related to mental health or opioid toxicity (OR 1.8;  $P < 0.001$ ).  
38  
39  
40  
41

## 42 **Mortality**

43  
44 We identified 31,998 deaths between 2016-2017 in our cohort of opioid users. Estimated  
45 risk of death was substantially higher with concurrent use when compared to opioid only use  
46 when comparing the control and case windows (12.7% vs. 18.6%; OR 1.90;  $P < 0.001$ ) with males  
47 having a higher risk than females (Table 3). Among concurrent patients, there was an opioid  
48 dose response effect on estimated risk of death with  $> 90$  OME associated with up to triple the  
49 risk when compared to  $< 50$  OME group (Table 4). Similar to the trends in hospitalizations or  
50  
51  
52  
53  
54  
55  
56  
57  
58  
59  
60

1  
2  
3 ED visits, there was an elevated estimated risk of death (12.1% vs. 49.1%; OR 4.93; P<0.001)  
4  
5 during the first 30 days of cumulative concurrent use (Table 3)  
6

7  
8 In sensitivity analyses, concurrent use was still associated with a higher risk of  
9  
10 hospitalization or ED visits and mortality when compared to opioid only use after adjusting the  
11  
12 length of study windows, number of control windows, and when cancer and palliative patients  
13  
14 were excluded.  
15

## 16 17 **Discussion**

18  
19 Many clinical resources warn that BZDs should not be combined with opioids<sup>1,5,17</sup>, yet our study  
20  
21 showed a substantial proportion of patients using an opioid did so in combination with a BZD in  
22  
23 Alberta, Canada. A concerning trend in adverse outcomes was observed with a near two-fold  
24  
25 increased risk of mortality associated with concurrent BZD and opioid use compared to opioid  
26  
27 only use. In particular, those age >65 years, those visiting multiple health providers, and higher  
28  
29 OME's were at highest relative risks. Importantly, the data also show that one of the highest risks  
30  
31 was observed in those that had concurrent use of less than a month with a near 2.5-fold relative  
32  
33 increase in hospitalizations or ED visits. Although perceived to be safer, tramadol concurrently  
34  
35 used with BZDs had a substantially higher risk than codeine, especially among females.  
36  
37

38  
39  
40 Our findings are consistent with two large studies done in the United States. Sun et al.<sup>15</sup>  
41  
42 reported that 17% of opioid patients concurrently used a BZD and that higher durations of opioid  
43  
44 use also carried higher risks of hospitalization or ED visit with respect to concurrent users,  
45  
46 findings that we also shared. However, compared to Sun et al, our overall cohort risk was lower  
47  
48 (OR 2.14 vs 1.13). This could be due to differences in study population and methodology; the  
49  
50 Sun study included privately insured patients and used a retrospective analysis whereas we  
51  
52 included all Albertans regardless of coverage and used a case-crossover design. The other study,  
53  
54  
55  
56  
57

1  
2  
3 done by Park et al., estimated risk of death among US veterans exposed to concurrent use of  
4  
5  
6  
7  
8  
9  
10  
11  
12  
13  
14  
15  
16  
17  
18  
19  
20  
21  
22  
23  
24  
25  
26  
27  
28  
29  
30  
31  
32  
33  
34  
35  
36  
37  
38  
39  
40  
41  
42  
43  
44  
45  
46  
47  
48  
49  
50  
51  
52  
53  
54  
55  
56  
57  
58  
59  
60

done by Park et al., estimated risk of death among US veterans exposed to concurrent use of opioids and BZDs<sup>16</sup>. Although both of our studies associated concurrent use of opioids and BZDs with increased risk of death, overall and in a dose dependent manner, the Park et al risk estimates were much higher than ours, almost double. Of note, however, Park et al included only veterans, which proportionally represented an older population than ours. When our death analysis was stratified by age, our risk of death estimates were very similar to the Park et al study. Furthermore, compared with the general population, veterans in the US have a higher prevalence of substance use disorders and mental illness, which carry their own risks<sup>29-31</sup>. As other studies have also observed, the estimated risk of an opioid-related death from taking 50-90 OME was double when compared to lower OME doses<sup>28</sup>. Estimates from our analyses indicate that this risk could increase by a factor of 2-3x from the addition of a BZD, depending on the age of the patient. Indeed, our findings showed that adding a BZD to any opioid molecule and to any opioid dose multiplied the risk of hospitalization or ED visit or death.

Our finding that hospitalization or ED visit and mortality risks were higher during the initial periods of concurrent use are also similar to another study done in the US<sup>32</sup>. Both of our estimates associate a higher risk during the first few days of concurrent use.

The strengths of our study include the large population-based sample with near complete capture of all opioid and BZD dispensations from community pharmacies using PIN. As well, hospitalizations and ED visits, and mortality from Alberta Health and Vital Statistics were also used to identify our outcomes. Since we used a case crossover design, many confounding variables would have been completely controlled for in our analysis (e.g. age, sex, co-morbidities) relative to that of other studies conducted to date, however, there could be residual confounding and bias due to the fact that opioid only users could be different than concurrent users in characteristics which our data may not adequately capture. We conducted a sensitivity



1  
2  
3 analysis that excluded patients diagnosed with a malignancy or palliative status to explore these  
4 issues and our original risk estimates were preserved. Importantly, other unknown factors which  
5  
6  
7 may have changed between the control and case windows could have affected our results.  
8

9  
10 Another limitation is that we are assuming that patients took their medications as prescribed.

11  
12 Medication adherence in opioid users is a challenging issue <sup>33</sup>.

13  
14  
15 Despite the messages from safe opioid prescribing guidelines<sup>1,5</sup>, our findings show that  
16  
17 Alberta, Canada still experiences troubling trends and risks associated with concurrent use of  
18  
19 opioids and BZDs. Although total prescribed OME's have declined across Canada during the  
20  
21 past few years <sup>34</sup>, the trend with concurrent use of opioids and BZDs is unknown and may in fact  
22  
23 be increasing <sup>15,20</sup>. From a clinical perspective, prescribers should closely follow opioid use  
24  
25 guidelines and avoid concurrent prescribing with BZDs in most clinical scenarios <sup>1,5</sup>. There is an  
26  
27 opportunity for providers to monitor and potentially avoid concurrent use altogether or reassess  
28  
29 for dose tapering. Future research should focus on why health providers and patients continue to  
30  
31 accept and rely on concurrent prescribing of these agents as a form of treatment. Policy makers  
32  
33 and professional regulatory bodies should reinforce safe opioid use prescribing guidelines and  
34  
35 educate providers about the additional risks associated with concurrent use of opioids and BZDs.  
36  
37  
38  
39  
40  
41

#### 42 **List of Figures:**

43  
44  
45 Figure 1. Risk of all cause hospitalization or emergency department visits among concurrent  
46  
47 users of opioids and benzodiazepines by molecule and opioid dose using codeine and <50 OME  
48  
49 as reference groups.

50  
51 Figure 2. Risk of hospitalization or emergency department visit comparing specific opioid  
52  
53 molecules and opioid doses used concurrently with BZDs~ to their respective monotherapy  
54  
55 counterparts  
56  
57

**Table 1. Characteristics of opioid users with incident hospitalizations/emergency department visits in the period 2016-2018**

| Characteristic                               | Total No. (%) of patients~<br>n=1,056,773* | No. (%) of concurrent users~<br>n=179,805@ | No. (%) of opioid only users~<br>n=876,968§ |
|----------------------------------------------|--------------------------------------------|--------------------------------------------|---------------------------------------------|
| <b>opioid users</b>                          | 1,056,773 (100)                            | 179,805 (100)                              | 876,968 (100)                               |
| <b>Number of dispensations for opioids</b>   | 11,240,195(--)                             | 5,855,666 (--)                             | 5,384,529 (--)                              |
| <b>Number of dispensations for BZRA's</b>    | 6,050,709(--)                              | 4,767,945 (--)                             | 1,282,764 (--)                              |
| <b>Sex:</b>                                  |                                            |                                            |                                             |
| <b>Female</b>                                | 581,457 (55)                               | 109,128 (60.7)                             | 472,411 (53.9)                              |
| <b>Male</b>                                  | 475,316 (45)                               | 70,677 (39.3)                              | 404,557 (46.1)                              |
| <b>Age at admission, year,</b>               |                                            |                                            |                                             |
| <b>median (IQR)</b>                          | 49 (34-62)                                 | 56 (43-67)                                 | 47 (32-61)                                  |
| <b>Mean (SD)</b>                             | 48.7 (18.1)                                | 55.2 (17.0)                                | 47.4 (18.1)                                 |
| <b>10-20</b>                                 | 48,721 (4.6)                               | 2,276 (1.3)                                | 46,445 (5.3)                                |
| <b>21-40</b>                                 | 339,380 (32.1)                             | 36,192 (20.1)                              | 303,188 (34.5)                              |
| <b>41-65</b>                                 | 464,720 (44.0)                             | 90,626 (50.4)                              | 374,094 (42.7)                              |
| <b>&gt;65</b>                                | 203,909 (19.3)                             | 50,708 (28.2)                              | 153,201 (17.5)                              |
| <b>Number of unique prescribers visited,</b> |                                            |                                            |                                             |
| <b>median (IQR)</b>                          | 2 (1-3)                                    | 4 (2-6)                                    | 1 (1-2)                                     |
| <b>Mean (SD)</b>                             | 2.3 (2.2)                                  | 4.5 (3.4)                                  | 1.9 (1.4)                                   |
| <b>1</b>                                     | 508,745 (48.1)                             | 19,252 (10.7)                              | 489,493 (55.8)                              |
| <b>2</b>                                     | 246,935 (23.4)                             | 33,594 (18.7)                              | 213,341 (24.3)                              |
| <b>3</b>                                     | 124,773 (11.8)                             | 33,473 (18.6)                              | 91,300 (10.4)                               |
| <b>4</b>                                     | 66,825 (6.3)                               | 26,573 (14.8)                              | 40,252 (4.6)                                |
| <b>&gt;5</b>                                 | 109,495 (10.4)                             | 66,913 (37.2)                              | 42,582 (4.9)                                |
| <b>Number of unique pharmacies visited,</b>  |                                            |                                            |                                             |
| <b>median (IQR)</b>                          | 2 (1-3)                                    | 3 (2-5)                                    | 2 (1-2)                                     |
| <b>Mean (SD)</b>                             | 2.37 (2.18)                                | 4.1 (3.8)                                  | 2.02 (1.45)                                 |
| <b>1</b>                                     | 431,651 (40.8)                             | 29,486 (16.4)                              | 402,165 (45.8)                              |
| <b>2</b>                                     | 301,730 (28.5)                             | 41,064 (22.8)                              | 260,666 (29.7)                              |
| <b>3</b>                                     | 151,297 (14.3)                             | 33,578 (18.8)                              | 117,710 (13.4)                              |
| <b>4</b>                                     | 73,698 (7.0)                               | 23,356 (13.0)                              | 50,342 (5.7)                                |
| <b>&gt;5</b>                                 | 98,406 (9.3)                               | 52,321 (29.1)                              | 46,085 (5.3)                                |
| <b>Total number of opioid prescriptions</b>  |                                            |                                            |                                             |
| <b>dispensed,</b>                            |                                            |                                            |                                             |
| <b>median (IQR)</b>                          | 2 (1-4)                                    | 8 (2-29)                                   | 1 (1-3)                                     |
| <b>Mean (SD)</b>                             | 9.8 (51.4)                                 | 32.6 (101.5)                               | 5.2 (30.9)                                  |
| <b>1-10</b>                                  | 919,059 (87.0)                             | 100,809 (56.0)                             | 818,250 (93.3)                              |
| <b>11-20</b>                                 | 48,371 (4.6)                               | 22,796 (12.7)                              | 25,575 (2.9)                                |
| <b>20-30</b>                                 | 23,706 (2.2)                               | 13,163 (7.3)                               | 10,543 (1.2)                                |
| <b>&gt;31</b>                                | 65,637 (6.2)                               | 43,037 (23.9)                              | 22,600 (2.6)                                |
| <b>Total cumulative days of opioid use,</b>  |                                            |                                            |                                             |
| <b>Median (IQR)</b>                          | 11 (5-39)                                  | 104 (21-522)                               | 9 (5-23)                                    |
| <b>mean (SD)</b>                             | 94.5 (224)                                 | 297.9 (358.0)                              | 52.8 (154.7)                                |
| <b>1-30</b>                                  | 744,607 (70.5)                             | 54,670 (30.4)                              | 689,937 (78.7)                              |
| <b>31-60</b>                                 | 94,659 (9.0)                               | 20,406 (11.4)                              | 74,253 (8.5)                                |
| <b>61-90</b>                                 | 35,536 (3.4)                               | 10,934 (6.1)                               | 24,602 (2.8)                                |
| <b>&gt;90</b>                                | 181,971 (17.2)                             | 93,795 (52.2)                              | 88,176 (10.1)                               |

**Table 1. Characteristics of opioid users with incident hospitalizations/emergency department visits in the period 2016-2018 (continued)**

|                                                                                                                                                                                                                                                                                                                                                          |                |                |                |
|----------------------------------------------------------------------------------------------------------------------------------------------------------------------------------------------------------------------------------------------------------------------------------------------------------------------------------------------------------|----------------|----------------|----------------|
| <b>Number of people that received a dispensation for specified opioid molecule and daily OME#:</b>                                                                                                                                                                                                                                                       |                |                |                |
| <b>buprenorphine/naloxone</b>                                                                                                                                                                                                                                                                                                                            |                |                |                |
| <b>methadone</b>                                                                                                                                                                                                                                                                                                                                         | 7,995 (0.76)   | 3,005 (1.7)    | 7,451 (0.85)   |
| <b>buprenorphine (transdermal patch)</b>                                                                                                                                                                                                                                                                                                                 | 7,394 (0.70)   | 3,218 (1.8)    | 7,043 (0.80)   |
| <b>codeine</b>                                                                                                                                                                                                                                                                                                                                           | 8,238 (0.78)   | 3,447 (1.9)    | 7,158 (0.82)   |
| <b>morphine</b>                                                                                                                                                                                                                                                                                                                                          | 738,601 (69.9) | 120,514 (67.0) | 701,243 (80.0) |
| <b>oxycodone</b>                                                                                                                                                                                                                                                                                                                                         | 29,796 (2.8)   | 12,069 (6.7)   | 25,828 (3.0)   |
| <b>oxycodone/naloxone</b>                                                                                                                                                                                                                                                                                                                                | 119,289 (11.3) | 37,692 (21.0)  | 108,036 (12.3) |
| <b>hydromorphone</b>                                                                                                                                                                                                                                                                                                                                     | 1,163 (0.11)   | 485 (0.27)     | 1,007 (0.12)   |
| <b>fentanyl</b>                                                                                                                                                                                                                                                                                                                                          | 70,181 (6.6)   | 22,376 (12.4)  | 62,205 (7.1)   |
| <b>tramadol</b>                                                                                                                                                                                                                                                                                                                                          | 8,888 (0.84)   | 6,279 (3.5)    | 8,067 (0.92)   |
| <b>tapentadol</b>                                                                                                                                                                                                                                                                                                                                        | 316,662 (30.0) | 50,891 (28.3)  | 292,965 (33.4) |
| <b>50 OME<sup>^</sup></b>                                                                                                                                                                                                                                                                                                                                | 1,570 (0.15)   | 696 (0.39)     | 1,387 (0.16)   |
| <b>50-90 OME<sup>^</sup></b>                                                                                                                                                                                                                                                                                                                             | 854,759 (86.3) | 154,742 (90.3) | 812,574 (99.2) |
| <b>&gt;90 OME<sup>^</sup></b>                                                                                                                                                                                                                                                                                                                            | 166,392 (16.8) | 48,642 (28.4)  | 144,629 (17.7) |
|                                                                                                                                                                                                                                                                                                                                                          | 101,837 (10.3) | 40,265 (23.5)  | 86,620 (10.6)  |
| <b>Total days of cumulative concurrency among concurrent users</b>                                                                                                                                                                                                                                                                                       |                |                |                |
| <b>1-30</b>                                                                                                                                                                                                                                                                                                                                              |                | 92,757 (51.6)  |                |
| <b>31-60</b>                                                                                                                                                                                                                                                                                                                                             |                | 17,327 (9.6)   |                |
| <b>61-90</b>                                                                                                                                                                                                                                                                                                                                             |                | 9,006 (5.0)    |                |
| <b>91-180</b>                                                                                                                                                                                                                                                                                                                                            | N/A            | 14,713 (8.2)   | N/A            |
| <b>181-270</b>                                                                                                                                                                                                                                                                                                                                           |                | 8,468 (4.7)    |                |
| <b>271-360</b>                                                                                                                                                                                                                                                                                                                                           |                | 6,270 (3.5)    |                |
| <b>&gt;361</b>                                                                                                                                                                                                                                                                                                                                           |                | 31,264 (17.4)  |                |
| <b>Elixhauser score:</b>                                                                                                                                                                                                                                                                                                                                 |                |                |                |
| <b>Mean (SD)</b>                                                                                                                                                                                                                                                                                                                                         | 2.86 (2.45)    | 4.36 (2.8)     | 2.56 (2.25)    |
| <b>Median (IQR)</b>                                                                                                                                                                                                                                                                                                                                      | 2 (1-4)        | 4 (2-6)        | 2 (1-4)        |
| <p>*n=990,098 for OME analyses<br/>           @n=171,457 for OME analyses<br/>           §n=818,641 for OME analyses<br/>           ~unless otherwise indicated<br/>           # defined as having at least 1 day at specified dose or molecule<br/>           ^OME=oral morphine equivalents, buprenorphine and methadone dropped from OME analysis</p> |                |                |                |

**Table 2. Risk of all cause hospitalization or emergency department visits in people using opioids and benzodiazepine receptor modulators during 2016-2018.**

| Patient Group                                | Analysis Group* |           |                         |  |                                  |           |               |           |
|----------------------------------------------|-----------------|-----------|-------------------------|--|----------------------------------|-----------|---------------|-----------|
|                                              | None            |           | Opioid only (reference) |  | Benzodiazepine <sup>^</sup> only |           | Concurrent    |           |
|                                              | OR (p-value)    | 95% CI    | OR                      |  | OR (p-value)                     | 95% CI    | OR (p-value)  | 95% CI    |
| <b>Overall population</b>                    | 0.21 (<0.001)   | 0.20-0.21 | 1                       |  | 0.46 (<0.001)                    | 0.45-0.48 | 1.13 (<0.001) | 1.10-1.17 |
| <b>Sex:</b>                                  |                 |           |                         |  |                                  |           |               |           |
| <b>Female</b>                                | 0.24 (<0.001)   | 0.23-0.25 | 1                       |  | 0.51 (<0.001)                    | 0.49-0.52 | 1.19 (<0.001) | 1.14-1.23 |
| <b>Male</b>                                  | 0.18 (<0.001)   | 0.18-0.19 | 1                       |  | 0.43 (<0.001)                    | 0.41-0.45 | 1.10 (<0.001) | 1.05-1.16 |
| <b>Age at admission:</b>                     |                 |           |                         |  |                                  |           |               |           |
| <b>20-40</b>                                 | 0.16 (<0.001)   | 0.15-0.16 | 1                       |  | 0.33 (<0.001)                    | 0.31-0.35 | 0.96 (0.33)   | 0.88-1.04 |
| <b>40-65</b>                                 | 0.23 (<0.001)   | 0.22-0.23 | 1                       |  | 0.48 (<0.001)                    | 0.46-0.50 | 1.12 (<0.001) | 1.07-1.18 |
| <b>&gt;65</b>                                | 0.30 (<0.001)   | 0.29-0.31 | 1                       |  | 0.73 (<0.001)                    | 0.69-0.77 | 1.50 (<0.001) | 1.39-1.61 |
| <b>Total days of cumulative concurrency:</b> |                 |           |                         |  |                                  |           |               |           |
| <b>1-30</b>                                  | 0.33 (<0.001)   | 0.31-0.35 | 1                       |  | 0.72 (<0.001)                    | 0.67-0.78 | 2.47 (<0.001) | 2.26-2.70 |
| <b>31-90</b>                                 | 0.45 (<0.001)   | 0.41-0.49 | 1                       |  | 1.05 (0.36)                      | 0.95-1.17 | 1.50 (<0.001) | 1.34-1.67 |
| <b>91-180</b>                                | 0.44 (<0.001)   | 0.39-0.49 | 1                       |  | 1.09 (0.24)                      | 0.95-1.24 | 1.45 (<0.001) | 1.28-1.64 |
| <b>181-365</b>                               | 0.42 (<0.001)   | 0.37-0.48 | 1                       |  | 1.11 (<0.11)                     | 0.97-1.3  | 1.57 (<0.001) | 1.40-1.76 |
| <b>&gt;365</b>                               | 0.26 (<0.001)   | 0.23-0.29 | 1                       |  | 1.26 (<0.001)                    | 1.11-1.41 | 1.82 (<0.001) | 1.67-1.99 |
| <b>&gt;900</b>                               | 0.13 (<0.001)   | 0.09-0.21 | 1                       |  | 1.64 (0.01)                      | 1.12-2.38 | 3.15 (<0.001) | 2.41-4.11 |
| <b>Total days of opioid use:</b>             |                 |           |                         |  |                                  |           |               |           |
| <b>1-7</b>                                   | 0.04 (<0.001)   | 0.03-0.05 | 1                       |  | 0.08 (<0.001)                    | 0.07-0.09 | 0.90 (0.40)   | 0.72-1.14 |
| <b>8-30</b>                                  | 0.15 (<0.001)   | 0.14-0.16 | 1                       |  | 0.30 (<0.001)                    | 0.28-0.32 | 1.21 (0.002)  | 1.07-1.38 |
| <b>31-90</b>                                 | 0.34 (<0.001)   | 0.33-0.35 | 1                       |  | 0.71 (<0.001)                    | 0.66-0.76 | 1.36 (<0.001) | 1.22-1.51 |
| <b>91-180</b>                                | 0.48 (<0.001)   | 0.46-0.51 | 1                       |  | 1.05 (0.35)                      | 0.95-1.15 | 1.54 (<0.001) | 1.37-1.73 |
| <b>181-365</b>                               | 0.54 (<0.001)   | 0.52-0.57 | 1                       |  | 1.27 (<0.001)                    | 1.15-1.40 | 1.73 (<0.001) | 1.56-1.92 |
| <b>&gt;365</b>                               | 0.41 (<0.001)   | 0.39-0.42 | 1                       |  | 1.21 (<0.001)                    | 1.12-1.32 | 1.76 (<0.001) | 1.66-1.86 |

**Table 2. Risk of all cause hospitalization or emergency department visits in people using opioids and benzodiazepine receptor modulators during 2016-2018 (continued)**

|                                        |               |           |   |  |               |           |               |           |
|----------------------------------------|---------------|-----------|---|--|---------------|-----------|---------------|-----------|
| <b>Number of opioid dispensations:</b> |               |           |   |  |               |           |               |           |
| <b>1-10</b>                            | 0.16 (<0.001) | 0.16-0.17 | 1 |  | 0.34 (<0.001) | 0.33-0.35 | 0.93 (0.01)   | 0.87-0.98 |
| <b>11-30</b>                           | 0.49 (<0.001) | 0.47-0.51 | 1 |  | 1.20 (<0.001) | 1.11-1.30 | 1.62 (<0.001) | 1.50-1.74 |
| <b>&gt;30</b>                          | 0.35 (<0.001) | 0.33-0.37 | 1 |  | 1.09 (0.10)   | 0.98-1.21 | 1.77 (<0.001) | 1.65-1.89 |
| <b>Number of unique prescribers:</b>   |               |           |   |  |               |           |               |           |
| <b>1</b>                               | 0.14 (<0.001) | 0.13-0.14 | 1 |  | 0.30 (<0.001) | 0.28-0.32 | 0.73 (<0.001) | 0.65-0.81 |
| <b>2</b>                               | 0.20 (<0.001) | 0.19-0.20 | 1 |  | 0.41 (<0.001) | 0.39-0.43 | 1.02 (0.64)   | 0.94-1.11 |
| <b>3</b>                               | 0.26 (<0.001) | 0.25-0.27 | 1 |  | 0.51 (<0.001) | 0.48-0.54 | 1.30 (<0.001) | 1.19-1.42 |
| <b>4</b>                               | 0.32 (<0.001) | 0.31-0.34 | 1 |  | 0.68 (<0.001) | 0.63-0.73 | 1.54 (<0.001) | 1.39-1.70 |
| <b>&gt;5</b>                           | 0.38 (<0.001) | 0.37-0.40 | 1 |  | 0.91 (<0.001) | 0.86-0.96 | 1.67 (<0.001) | 1.57-1.77 |
| <b>Number of unique pharmacies:</b>    |               |           |   |  |               |           |               |           |
| <b>1</b>                               | 0.14 (<0.001) | 0.13-0.15 | 1 |  | 0.32 (<0.001) | 0.31-0.35 | 0.95 (0.25)   | 0.86-1.04 |
| <b>2</b>                               | 0.20 (<0.001) | 0.19-0.21 | 1 |  | 0.45 (<0.001) | 0.43-0.48 | 1.12 (0.007)  | 1.03-1.21 |
| <b>3</b>                               | 0.27 (<0.001) | 0.26-0.28 | 1 |  | 0.56 (<0.001) | 0.52-0.59 | 1.24 (<0.001) | 1.14-1.35 |
| <b>4</b>                               | 0.31 (<0.001) | 0.29-0.33 | 1 |  | 0.66 (<0.001) | 0.61-0.71 | 1.47 (<0.001) | 1.33-1.64 |
| <b>&gt;5</b>                           | 0.39 (<0.001) | 0.38-0.41 | 1 |  | 0.78 (<0.001) | 0.73-0.83 | 1.47 (<0.001) | 1.38-1.57 |

**Note: CI = confidence interval, OR=odds ratio**

**\* Risk interval= seven days before hospitalization/emergency visit; control interval= seven-day period one month before hospitalization/emergency department visit**

**^includes all benzodiazepine receptor modulators**

**Table 3. Risk of all cause death in 2016-2017 among opioid users and subgroups of patients. N=31,998**

| <b>Patient Category</b>   | <b>None</b>                    | <b>Opioid only (reference group)</b> | <b>Benzodiazepine /Z-drug only</b> | <b>Concurrent</b>              |
|---------------------------|--------------------------------|--------------------------------------|------------------------------------|--------------------------------|
|                           | <b>OR (p-value)<br/>95% CI</b> |                                      | <b>OR (p-value)<br/>95% CI</b>     | <b>OR (p-value)<br/>95% CI</b> |
| <b>Overall population</b> | 0.67 (<0.001)<br>0.64-0.71     | 1                                    | 0.76 (<0.001)<br>0.69-0.83         | 1.90 (<0.001)<br>1.76-2.05     |
| <b>Sex:</b>               |                                |                                      |                                    |                                |
| <b>Female</b>             | 0.64 (<0.001)<br>0.60-0.70     | 1                                    | 0.68 (<0.001)<br>0.60-0.78         | 1.73 (<0.001)<br>1.56-1.92     |
| <b>Male</b>               | 0.70 (<0.001)<br>0.62-0.76     | 1                                    | 0.85 (0.02)<br>0.75-0.97           | 2.09 (<0.001)<br>1.87-2.33     |
| <b>Age at death:</b>      |                                |                                      |                                    |                                |
| <b>18-45</b>              | 1.20 (0.13)<br>0.94-1.54       | 1                                    | 1.98 (<0.001)<br>1.38-2.86         | 2.26 (<0.001)<br>1.63-3.13     |
| <b>46-65</b>              | 1.13 (0.03)<br>1.01-1.28       | 1                                    | 1.24 (0.03)<br>1.02-1.51           | 2.20 (<0.001)<br>1.90-2.55     |
| <b>&gt;65</b>             | 0.56 (<0.001)<br>0.52-0.60     | 1                                    | 0.61 (<0.001)<br>0.54-0.68         | 1.79 (<0.001)<br>1.63-1.97     |

1  
2  
3  
4  
5  
6  
7  
8  
9  
10  
11  
12  
13  
14  
15  
16  
17  
18  
19  
20  
21  
22  
23  
24  
25  
26  
27  
28  
29  
30  
31  
32  
33  
34  
35  
36  
37  
38  
39  
40  
41  
42  
43  
44  
45  
46  
47

**Table 3. Risk of all cause death in 2016-2017 among opioid users and subgroups of patients. N=31,998 (continued)**

|                                              |                            |   |                          |                            |
|----------------------------------------------|----------------------------|---|--------------------------|----------------------------|
| <b>Total days of cumulative concurrency:</b> |                            |   |                          |                            |
| <b>1-30</b>                                  | 0.82 (0.007)<br>0.71-0.95  | 1 | 0.88 (0.17)<br>0.74-1.05 | 4.93 (<0.001)<br>4.29-5.66 |
| <b>31-90</b>                                 | 2.4 (<0.001)<br>1.84-3.15  | 1 | 1.18 (0.21)<br>0.91-1.56 | 1.41 (0.001)<br>1.14-1.74  |
| <b>91-180</b>                                | 2.39 (<0.001)<br>1.58-3.60 | 1 | 1.74 (0.01)<br>1.12-2.68 | 0.80 (0.20)<br>0.56-1.12   |
| <b>181-365</b>                               | 4.27 (<0.001)<br>2.58-7.07 | 1 | 1.54 (0.08)<br>0.94-2.51 | 0.92 (0.66)<br>0.63-1.33   |
| <b>&gt;365</b>                               | 1.53 (0.26)<br>0.73-3.24   | 1 | 1.17 (0.71)<br>0.51-2.72 | 0.39 (0.003)<br>0.21-0.72  |

For peer review only

**Table 3. Risk of all cause death in 2016-2017 among opioid users and subgroups of patients  $N=31,998$  (continued)**

|                                  |                            |   |                            |                            |
|----------------------------------|----------------------------|---|----------------------------|----------------------------|
| <b>Total days of opioid use:</b> |                            |   |                            |                            |
| <b>1-7</b>                       | 0.14 (<0.001)<br>0.11-0.17 | 1 | 0.17 (<0.001)<br>0.12-0.23 | 2.78 (<0.001)<br>1.79-4.32 |
| <b>8-30</b>                      | 0.38 (<0.001)<br>0.34-0.42 | 1 | 0.48 (<0.001)<br>0.40-0.59 | 2.29 (<0.001)<br>1.89-2.78 |
| <b>31-90</b>                     | 1.03 (0.56)<br>0.92-1.16   | 1 | 1.46 (<0.001)<br>1.19-1.78 | 2.58 (<0.001)<br>2.22-3.00 |
| <b>91-180</b>                    | 2.08 (<0.001)<br>1.75-2.48 | 1 | 2.62 (<0.001)<br>1.96-3.51 | 2.16 (<0.001)<br>1.80-2.60 |
| <b>181-365</b>                   | 2.66 (<0.001)<br>2.18-3.24 | 1 | 3.13 (<0.001)<br>2.24-4.38 | 1.83 (<0.001)<br>1.50-2.23 |
| <b>&gt;365</b>                   | 2.83 (<0.001)<br>2.16-3.71 | 1 | 2.41 (<0.001)<br>1.51-3.87 | 1.20 (0.15)<br>0.93-1.53   |



1  
2  
3  
4  
5  
6  
7  
8  
9  
10  
11  
12  
13  
14  
15  
16  
17  
18  
19  
20  
21  
22  
23  
24  
25  
26  
27  
28  
29  
30  
31  
32  
33  
34  
35  
36  
37  
38  
39  
40  
41  
42  
43  
44  
45  
46  
47

|                                        |                            |   |                            |                            |
|----------------------------------------|----------------------------|---|----------------------------|----------------------------|
| <b>Number of opioid dispensations:</b> |                            |   |                            |                            |
| <b>1-10</b>                            | 0.41 (<0.001)<br>0.38-0.44 | 1 | 0.45 (<0.001)<br>0.39-0.51 | 2.23 (<0.001)<br>1.96-2.54 |
| <b>11-30</b>                           | 1.36 (<0.001)<br>1.20-1.54 | 1 | 1.72 (<0.001)<br>1.41-2.11 | 2.70 (<0.001)<br>2.34-3.12 |
| <b>&gt;30</b>                          | 2.11 (<0.001)<br>1.83-2.44 | 1 | 1.82 (<0.001)<br>1.46-2.28 | 1.40 (<0.001)<br>1.21-1.62 |

**Table 3. Risk of all cause death in 2016-2017 among opioid users and subgroups of patients. N=31,998 (continued)**

|                                      |                            |   |                            |                            |
|--------------------------------------|----------------------------|---|----------------------------|----------------------------|
| <b>Number of unique prescribers:</b> |                            |   |                            |                            |
| <b>1</b>                             | 0.31 (<0.001)<br>0.27-0.36 | 1 | 0.49 (0.001)<br>0.32-0.74  | 2.50 (<0.001)<br>1.76-3.56 |
| <b>2</b>                             | 0.51 (<0.001)<br>0.44-0.58 | 1 | 0.63 (<0.001)<br>0.48-0.81 | 2.29 (<0.001)<br>1.81-2.90 |
| <b>3</b>                             | 0.60 (<0.001)<br>0.52-0.69 | 1 | 0.71 (0.004)<br>0.56-0.90  | 2.03 (<0.001)<br>1.64-2.52 |
| <b>4</b>                             | 0.75 (<0.001)<br>0.64-0.87 | 1 | 0.82 (0.12)<br>0.64-1.05   | 2.49 (<0.001)<br>2.01-3.08 |
| <b>&gt;5</b>                         | 1.36 (<0.001)<br>1.23-1.50 | 1 | 1.10 (0.15)<br>0.96-1.26   | 2.01 (<0.001)<br>1.82-2.24 |

**Table 3. Risk of all cause death in 2016-2017 among opioid users and subgroups of patients. N=31,998 (continued)**

| Number of unique pharmacies: |                            |   |                            |                            |
|------------------------------|----------------------------|---|----------------------------|----------------------------|
| 1                            | 0.54 (<0.001)<br>0.50-0.60 | 1 | 0.72 (0.001)<br>0.60-0.87  | 1.41 (<0.001)<br>1.20-1.66 |
| 2                            | 0.65 (<0.001)<br>0.59-0.71 | 1 | 0.74 (<0.001)<br>0.62-0.87 | 2.09 (<0.001)<br>1.82-2.40 |
| 3                            | 0.73 (<0.001)<br>0.64-0.84 | 1 | 0.78 (0.018)<br>0.63-0.96  | 2.48 (<0.001)<br>2.09-2.93 |
| 4                            | 0.99 (0.96)<br>0.81-1.21   | 1 | 0.82 (0.18)<br>0.61-1.10   | 2.20 (<0.001)<br>1.76-2.76 |
| >5                           | 1.30 (0.01)<br>1.06-1.59   | 1 | 1.14 (0.33)<br>0.88-1.48   | 1.81 (<0.001)<br>1.47-2.24 |

**Note: OR= odds ratio; 95% CI= 95% confidence interval; Risk interval= seven days before death; control interval= seven-day period one month before death**

**^benzodiazepine receptor modulator includes Z-drugs**

**Table 4. Risk of all cause death in 2016-2017 among patients co-prescribed BZDs and opioids stratified by OME (n=31,998)**

| Category                  | <50<br>(reference group) | OME                        |                            |
|---------------------------|--------------------------|----------------------------|----------------------------|
|                           |                          | 50-90                      | >90                        |
|                           | OR (p-value)<br>95% CI   | OR (p-value)<br>95% CI     | OR (p-value)<br>95% CI     |
| <b>Overall population</b> | 1                        | 1.72 (<0.001)<br>1.35-2.19 | 3.13 (<0.001)<br>2.50-3.92 |
| <b>Female</b>             | 1                        | 1.76 (<0.001)<br>1.25-2.48 | 3.22 (<0.001)<br>2.35-4.40 |
| <b>Male</b>               | 1                        | 1.68 (0.003)<br>1.19-2.37  | 3.04 (<0.001)<br>2.20-4.19 |
| <b>Age at death:</b>      |                          |                            |                            |
| <b>18-45</b>              | 1                        | 0.90 (0.83)<br>0.35-2.31   | 2.31 (0.08)<br>0.92-5.85   |
| <b>46-65</b>              | 1                        | 2.19 (<0.001)<br>1.41-3.39 | 2.78 (<0.001)<br>1.84-4.18 |
| <b>&gt;65</b>             | 1                        | 1.60 (0.003)<br>1.18-2.18  | 3.41 (<0.001)<br>2.57-4.52 |

**Note:** BZD: benzodiazepines/Z-drugs; OME: Oral morphine equivalents, <50 OME category is the reference group;

Buprenorphine and methadone were excluded

## References

1. Busse JW, Craigie S, Juurlink DN, et al. Guideline for opioid therapy and chronic noncancer pain. *Canadian Medical Association Journal*. 2017;189(18):E659-E666.
2. Guan Q, Khuu W, Martins D, et al. Evaluating the early impacts of delisting high-strength opioids on patterns of prescribing in Ontario. *Health Promotion and Chronic Disease Prevention in Canada*. 2018;38(6):256-262.
3. Belzak L, Halverson J. Evidence synthesis - The opioid crisis in Canada: a national perspective. *Health Promotion and Chronic Disease Prevention in Canada*. 2018;38(6):224-233.
4. O'Connor S, Grywacheski V, Louie K. At-a-glance - Hospitalizations and emergency department visits due to opioid poisoning in Canada. *Health Promotion and Chronic Disease Prevention in Canada*. 2018;38(6):244-247.
5. Dowell D. CDC guideline for prescribing opioids for chronic pain. 2016.
6. College of Physicians and Surgeons of Alberta. Clinical Toolkit Benzodiazepines: Use and Taper. 2016; <http://www.cpsa.ca/wp-content/uploads/2017/06/Benzodiazepine-Clinical-Toolkit-Use-and-Taper.pdf>.
7. Katzman MA, Bleau P, Blier P, et al. Canadian clinical practice guidelines for the management of anxiety, posttraumatic stress and obsessive-compulsive disorders. *BMC Psychiatry*. 2014;14 Suppl 1:S1.
8. Canadian Pharmacists Association. RxTx. 2019; <https://www.e-therapeutics.ca/search>.
9. TOP TOP. Guideline for Adult Primary Insomnia [Internet]. 2010; [http://www.topalbertadoctors.org/download/439/insomnia\\_management\\_guideline.pdf](http://www.topalbertadoctors.org/download/439/insomnia_management_guideline.pdf).
10. ChooseWiselyCanada. The Canadian Geriatrics Society has developed a list of 5 things physicians and patients should question in geriatrics [Internet]. <https://choosingwiselycanada.org/geriatrics/>.
11. Cunningham CM, Hanley GE, Morgan S. Patterns in the use of benzodiazepines in British Columbia: examining the impact of increasing research and guideline cautions against long-term use. *Health Policy*. 2010;97(2):122-129.
12. Weir DL, Samanani S, Gilani F, Jess E, Eurich DT. Benzodiazepine receptor agonist dispensations in Alberta: a population-based descriptive study. *CMAJ Open*. 2018;6(4):E678-E684.
13. Bohnert AS, Ilgen MA, Ignacio RV, McCarthy JF, Valenstein M, Blow FC. Risk of death from accidental overdose associated with psychiatric and substance use disorders. *American Journal of Psychiatry*. 2012;169(1):64-70.
14. Pfeiffer PN, Ganoczy D, Ilgen M, Zivin K, Valenstein M. Comorbid anxiety as a suicide risk factor among depressed veterans. *Depression and anxiety*. 2009;26(8):752-757.
15. Sun EC, Dixit A, Humphreys K, Darnall BD, Baker LC, Mackey S. Association between concurrent use of prescription opioids and benzodiazepines and overdose: retrospective analysis. *BMJ*. 2017;356:j760.
16. Park TW, Saitz R, Ganoczy D, Ilgen MA, Bohnert AS. Benzodiazepine prescribing patterns and deaths from drug overdose among US veterans receiving opioid analgesics: case-cohort study. *BMJ*. 2015;350:h2698.
17. ismp Canada. Essential Clinical Skills for Opioid Prescribers. 2017; <https://www.ismp-canada.org/download/OpioidStewardship/Opioid-Prescribing-Skills.pdf>. Accessed Nov 2018.

18. Jones JD, Mogali S, Comer SD. Polydrug abuse: a review of opioid and benzodiazepine combination use. *Drug and alcohol dependence*. 2012;125(1-2):8-18.
19. Sharma V, Weir D, Samanani S, et al. Characterisation of concurrent use of prescription opioids and benzodiazepine/Z-drugs in Alberta, Canada: a population-based study. *BMJ open*. 2019;9(9):e030858.
20. Hwang CS, Kang EM, Kornegay CJ, Staffa JA, Jones CM, McAninch JK. Trends in the Concomitant Prescribing of Opioids and Benzodiazepines, 2002-2014. *Am J Prev Med*. 2016;51(2):151-160.
21. Vozoris NT. Benzodiazepine and opioid co-usage in the US population, 1999–2014: an exploratory analysis. *Sleep*. 2019;42(4).
22. Gomes T. *Latest trends in opioid-related deaths in Ontario: 1991 to 2015*. Ontario Drug Policy Research Network; 2017.
23. Manitoba Health. Surveillance of Opioid Misuse and Overdose in Manitoba. [Internet]. 2017; [https://www.gov.mb.ca/health/publichealth/surveillance/docs/opioid/2017/q1\\_opioid.pdf](https://www.gov.mb.ca/health/publichealth/surveillance/docs/opioid/2017/q1_opioid.pdf).
24. Maclure M, Mittleman aMA. Should We Use a Case-Crossover Design? *Annual Review of Public Health*. 2000;21(1):193-221.
25. Hallas J, Pottegård A. Use of self-controlled designs in pharmacoepidemiology. *Journal of Internal Medicine*. 2014;275(6):581-589.
26. Schneeweiss S, Sturmer T, Maclure M. <Case crossover and case-time-control design\_Pharmacoepi & Drug Safety 1997.pdf>. 1997.
27. Wright AJ, Gomes T, Mamdani MM, Horn JR, Juurlink DN. The risk of hypotension following co-prescription of macrolide antibiotics and calcium-channel blockers. *Canadian Medical Association Journal*. 2011;183(3):303-307.
28. Gomes T, Mamdani MM, Dhalla IA, Paterson JM, Juurlink DN. Opioid Dose and Drug-Related Mortality in Patients With Nonmalignant Pain Opioid Dose and Drug-related Mortality. *JAMA Internal Medicine*. 2011;171(7):686-691.
29. Vazan P, Golub A, Bennett AS. Substance use and other mental health disorders among veterans returning to the inner city: Prevalence, correlates, and rates of unmet treatment need. *Substance use & misuse*. 2013;48(10):880-893.
30. Lan CW, Fiellin DA, Barry DT, et al. The epidemiology of substance use disorders in US Veterans: A systematic review and analysis of assessment methods. *The American journal on addictions*. 2016;25(1):7-24.
31. Wagner TH, Harris KM, Federman B, Dai L, Luna Y, Humphreys K. Prevalence of substance use disorders among veterans and comparable nonveterans from the National Survey on Drug Use and Health. *Psychological Services*. 2007;4(3):149.
32. Hernandez I, He M, Brooks MM, Zhang Y. Exposure-Response Association Between Concurrent Opioid and Benzodiazepine Use and Risk of Opioid-Related Overdose in Medicare Part D Beneficiaries. *JAMA Netw Open*. 2018;1(2):e180919.
33. Graziottin A, Gardner-Nix J, Stumpf M, Berliner MN. Opioids: How to Improve Compliance and Adherence. *Pain Practice*. 2011;11(6):574-581.
34. Abdesselam K, Dann MJ, Alwis R, Laroche J, Ilek-Priouzeau S. At-a-glance - Opioid surveillance: monitoring and responding to the evolving crisis. *Health Promot Chronic Dis Prev Can*. 2018;38(9):312-316.

**Figure 1. Risk of all cause hospitalization or emergency department visits among concurrent users of opioids and benzodiazepines by molecule and opioid dose\* using codeine and <50 OME\* as reference groups.**

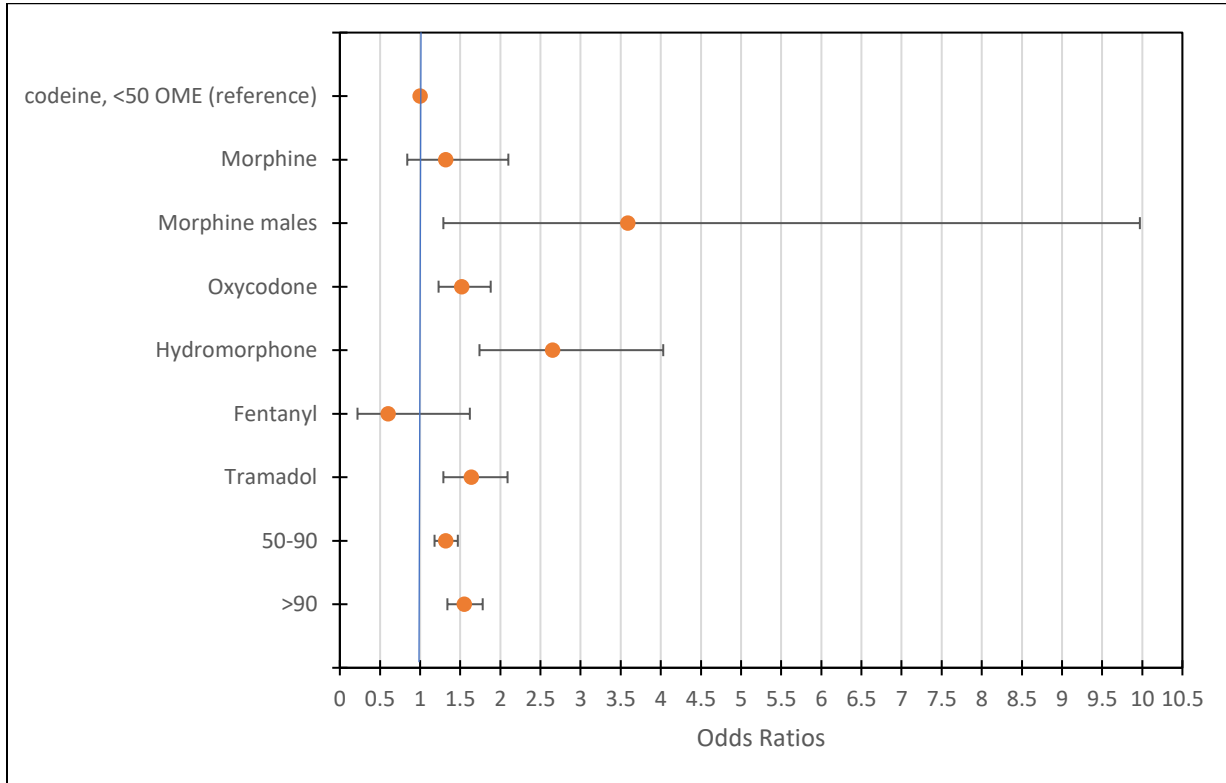

**Note: bars represent 95% confidence intervals**

**\*Dose is oral morphine equivalents (OME) and <50 OME is the reference. Buprenorphine and methadone have been excluded.**

**Figure 2. Risk of hospitalization or emergency department visit comparing specific opioid molecules and opioid doses\* used concurrently with BZDs~ to their respective monotherapy counterparts^**

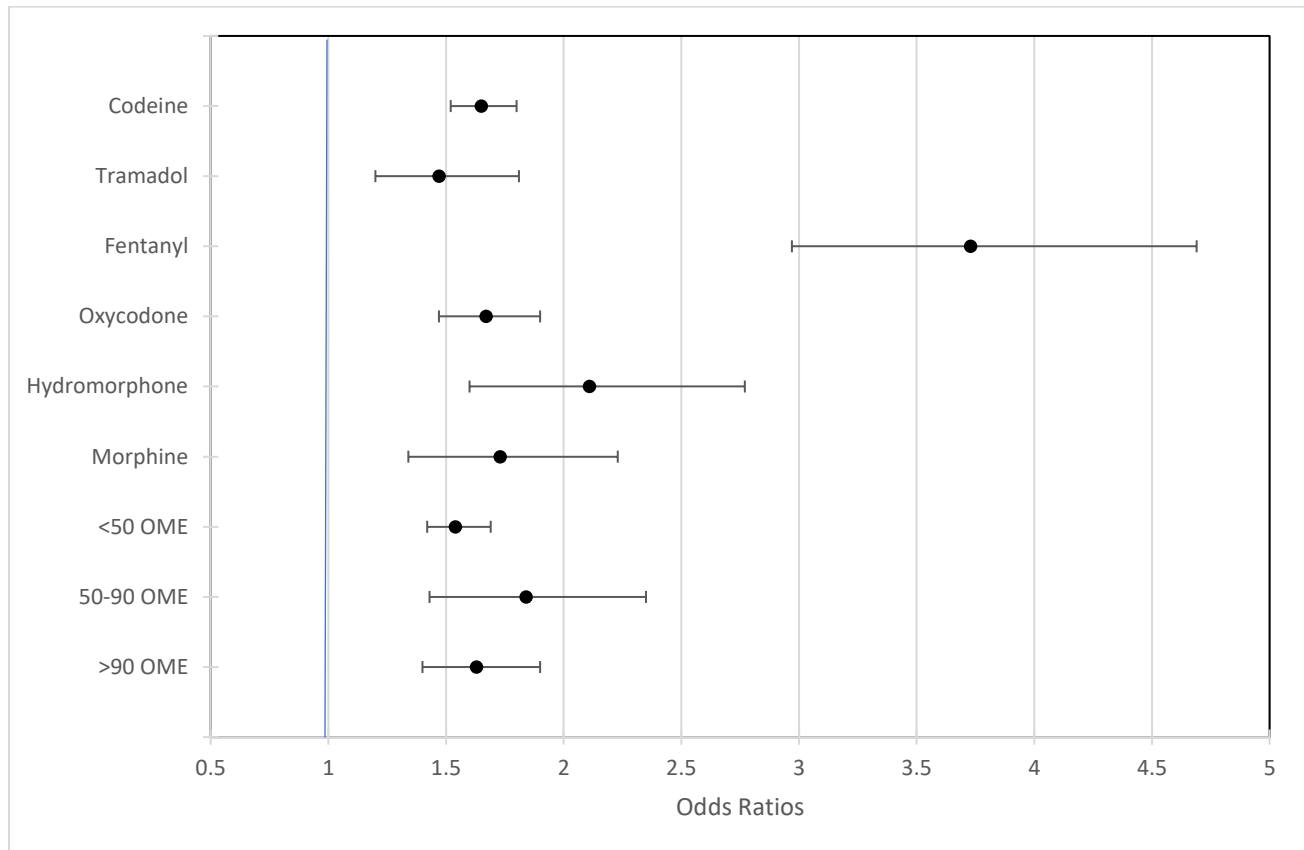

**Note: bars represent 95% confidence intervals**

**\*Opioid dose is oral morphine equivalents (OME); buprenorphine and methadone have been excluded**

**~Benzodiazepine receptor modulator (includes Z-drugs)**

**^For example, the odds ratio plotted for codeine represents the risk of codeine + BZD compared to codeine alone and that of <50 OME represents the risk of <50 OME + BZD compared to <50 OME alone**

## STROBE Statement—checklist of items that should be included in reports of observational studies

|                              | Item No | Recommendation                                                                                                                                                                                                                                                                                                                                                                                                                                                         | Page No |
|------------------------------|---------|------------------------------------------------------------------------------------------------------------------------------------------------------------------------------------------------------------------------------------------------------------------------------------------------------------------------------------------------------------------------------------------------------------------------------------------------------------------------|---------|
| <b>Title and abstract</b>    | 1       | (a) Indicate the study's design with a commonly used term in the title or the abstract                                                                                                                                                                                                                                                                                                                                                                                 | 1       |
|                              |         | (b) Provide in the abstract an informative and balanced summary of what was done and what was found                                                                                                                                                                                                                                                                                                                                                                    | 2       |
| <b>Introduction</b>          |         |                                                                                                                                                                                                                                                                                                                                                                                                                                                                        |         |
| Background/rationale         | 2       | Explain the scientific background and rationale for the investigation being reported                                                                                                                                                                                                                                                                                                                                                                                   | 4       |
| Objectives                   | 3       | State specific objectives, including any prespecified hypotheses                                                                                                                                                                                                                                                                                                                                                                                                       | 5       |
| <b>Methods</b>               |         |                                                                                                                                                                                                                                                                                                                                                                                                                                                                        |         |
| Study design                 | 4       | Present key elements of study design early in the paper                                                                                                                                                                                                                                                                                                                                                                                                                | 6       |
| Setting                      | 5       | Describe the setting, locations, and relevant dates, including periods of recruitment, exposure, follow-up, and data collection                                                                                                                                                                                                                                                                                                                                        | 5-6     |
| Participants                 | 6       | (a) <i>Cohort study</i> —Give the eligibility criteria, and the sources and methods of selection of participants. Describe methods of follow-up<br><i>Case-control study</i> —Give the eligibility criteria, and the sources and methods of case ascertainment and control selection. Give the rationale for the choice of cases and controls<br><i>Cross-sectional study</i> —Give the eligibility criteria, and the sources and methods of selection of participants | 5-6     |
|                              |         | (b) <i>Cohort study</i> —For matched studies, give matching criteria and number of exposed and unexposed<br><i>Case-control study</i> —For matched studies, give matching criteria and the number of controls per case                                                                                                                                                                                                                                                 | 5-6     |
| Variables                    | 7       | Clearly define all outcomes, exposures, predictors, potential confounders, and effect modifiers. Give diagnostic criteria, if applicable                                                                                                                                                                                                                                                                                                                               | 6-7     |
| Data sources/<br>measurement | 8*      | For each variable of interest, give sources of data and details of methods of assessment (measurement). Describe comparability of assessment methods if there is more than one group                                                                                                                                                                                                                                                                                   | 5       |
| Bias                         | 9       | Describe any efforts to address potential sources of bias                                                                                                                                                                                                                                                                                                                                                                                                              | 7       |
| Study size                   | 10      | Explain how the study size was arrived at                                                                                                                                                                                                                                                                                                                                                                                                                              | 5       |
| Quantitative variables       | 11      | Explain how quantitative variables were handled in the analyses. If applicable, describe which groupings were chosen and why                                                                                                                                                                                                                                                                                                                                           | 6       |
| Statistical methods          | 12      | (a) Describe all statistical methods, including those used to control for confounding                                                                                                                                                                                                                                                                                                                                                                                  | 7       |
|                              |         | (b) Describe any methods used to examine subgroups and interactions                                                                                                                                                                                                                                                                                                                                                                                                    | 7       |
|                              |         | (c) Explain how missing data were addressed                                                                                                                                                                                                                                                                                                                                                                                                                            |         |
|                              | 7       | (d) <i>Cohort study</i> —If applicable, explain how loss to follow-up was addressed<br><i>Case-control study</i> —If applicable, explain how matching of cases and controls was addressed<br><i>Cross-sectional study</i> —If applicable, describe analytical methods taking account of sampling strategy                                                                                                                                                              | 7       |
|                              |         | (e) Describe any sensitivity analyses                                                                                                                                                                                                                                                                                                                                                                                                                                  | 8       |

Continued on next page



1  
2  
3  
4  
5  
6  
7  
8  
9  
10  
11  
12  
13  
14  
15  
16  
17  
18  
19  
20  
21  
22  
23  
24  
25  
26  
27  
28  
29  
30  
31  
32  
33  
34  
35  
36  
37  
38  
39  
40  
41  
42  
43  
44  
45  
46  
47  
48  
49  
50  
51  
52  
53  
54  
55  
56  
57  
58  
59  
60**Results**

|                  |     |                                                                                                                                                                                                                                                                                                                                                                                                               |     |
|------------------|-----|---------------------------------------------------------------------------------------------------------------------------------------------------------------------------------------------------------------------------------------------------------------------------------------------------------------------------------------------------------------------------------------------------------------|-----|
| Participants     | 13* | (a) Report numbers of individuals at each stage of study—eg numbers potentially eligible, examined for eligibility, confirmed eligible, included in the study, completing follow-up, and analysed<br>(b) Give reasons for non-participation at each stage<br>(c) Consider use of a flow diagram                                                                                                               | 8   |
| Descriptive data | 14* | (a) Give characteristics of study participants (eg demographic, clinical, social) and information on exposures and potential confounders<br>(b) Indicate number of participants with missing data for each variable of interest<br>(c) <i>Cohort study</i> —Summarise follow-up time (eg, average and total amount)                                                                                           | 13  |
| Outcome data     | 15* | <i>Cohort study</i> —Report numbers of outcome events or summary measures over time<br><i>Case-control study</i> —Report numbers in each exposure category, or summary measures of exposure<br><i>Cross-sectional study</i> —Report numbers of outcome events or summary measures                                                                                                                             | 8-9 |
| Main results     | 16  | (a) Give unadjusted estimates and, if applicable, confounder-adjusted estimates and their precision (eg, 95% confidence interval). Make clear which confounders were adjusted for and why they were included<br>(b) Report category boundaries when continuous variables were categorized<br>(c) If relevant, consider translating estimates of relative risk into absolute risk for a meaningful time period | 8-9 |
| Other analyses   | 17  | Report other analyses done—eg analyses of subgroups and interactions, and sensitivity analyses                                                                                                                                                                                                                                                                                                                | 9   |

**Discussion**

|                  |    |                                                                                                                                                                            |       |
|------------------|----|----------------------------------------------------------------------------------------------------------------------------------------------------------------------------|-------|
| Key results      | 18 | Summarise key results with reference to study objectives                                                                                                                   | 10    |
| Limitations      | 19 | Discuss limitations of the study, taking into account sources of potential bias or imprecision. Discuss both direction and magnitude of any potential bias                 | 11    |
| Interpretation   | 20 | Give a cautious overall interpretation of results considering objectives, limitations, multiplicity of analyses, results from similar studies, and other relevant evidence | 11-12 |
| Generalisability | 21 | Discuss the generalisability (external validity) of the study results                                                                                                      | 11-12 |

**Other information**

|         |    |                                                                                                                                                               |   |
|---------|----|---------------------------------------------------------------------------------------------------------------------------------------------------------------|---|
| Funding | 22 | Give the source of funding and the role of the funders for the present study and, if applicable, for the original study on which the present article is based | 1 |
|---------|----|---------------------------------------------------------------------------------------------------------------------------------------------------------------|---|

\*Give information separately for cases and controls in case-control studies and, if applicable, for exposed and unexposed groups in cohort and cross-sectional studies.

**Note:** An Explanation and Elaboration article discusses each checklist item and gives methodological background and published examples of transparent reporting. The STROBE checklist is best used in conjunction with this article (freely available on the Web sites of PLoS Medicine at <http://www.plosmedicine.org/>, Annals of Internal Medicine at <http://www.annals.org/>, and Epidemiology at <http://www.epidem.com/>). Information on the STROBE Initiative is available at [www.strobe-statement.org](http://www.strobe-statement.org).

# BMJ Open

## Concurrent use of opioids and benzodiazepines/Z-drugs in Alberta, Canada and the risk of hospitalization and death: a case crossover study

|                                 |                                                                                                                                                                                                                                                                                                                                         |
|---------------------------------|-----------------------------------------------------------------------------------------------------------------------------------------------------------------------------------------------------------------------------------------------------------------------------------------------------------------------------------------|
| Journal:                        | <i>BMJ Open</i>                                                                                                                                                                                                                                                                                                                         |
| Manuscript ID                   | bmjopen-2020-038692.R1                                                                                                                                                                                                                                                                                                                  |
| Article Type:                   | Original research                                                                                                                                                                                                                                                                                                                       |
| Date Submitted by the Author:   | 06-Jul-2020                                                                                                                                                                                                                                                                                                                             |
| Complete List of Authors:       | Sharma, Vishal; University of Alberta, School of Public Health<br>Simpson, Scot H.; University of Alberta, Faculty of Pharmacy and Pharmaceutical Sciences<br>Samanani, Salim; Okaki Health Intelligence,<br>Jess, Ed; The College of Physicians & Surgeons of Alberta,<br>Eurich, Dean; University of Alberta, School of Public Health |
| <b>Primary Subject Heading</b>: | Epidemiology                                                                                                                                                                                                                                                                                                                            |
| Secondary Subject Heading:      | Public health, Research methods                                                                                                                                                                                                                                                                                                         |
| Keywords:                       | EPIDEMIOLOGY, PUBLIC HEALTH, Substance misuse < PSYCHIATRY, PAIN MANAGEMENT, Adverse events < THERAPEUTICS                                                                                                                                                                                                                              |
|                                 |                                                                                                                                                                                                                                                                                                                                         |

SCHOLARONE™  
Manuscripts



I, the Submitting Author has the right to grant and does grant on behalf of all authors of the Work (as defined in the below author licence), an exclusive licence and/or a non-exclusive licence for contributions from authors who are: i) UK Crown employees; ii) where BMJ has agreed a CC-BY licence shall apply, and/or iii) in accordance with the terms applicable for US Federal Government officers or employees acting as part of their official duties; on a worldwide, perpetual, irrevocable, royalty-free basis to BMJ Publishing Group Ltd ("BMJ") its licensees and where the relevant Journal is co-owned by BMJ to the co-owners of the Journal, to publish the Work in this journal and any other BMJ products and to exploit all rights, as set out in our [licence](#).

The Submitting Author accepts and understands that any supply made under these terms is made by BMJ to the Submitting Author unless you are acting as an employee on behalf of your employer or a postgraduate student of an affiliated institution which is paying any applicable article publishing charge ("APC") for Open Access articles. Where the Submitting Author wishes to make the Work available on an Open Access basis (and intends to pay the relevant APC), the terms of reuse of such Open Access shall be governed by a Creative Commons licence – details of these licences and which [Creative Commons](#) licence will apply to this Work are set out in our licence referred to above.

Other than as permitted in any relevant BMJ Author's Self Archiving Policies, I confirm this Work has not been accepted for publication elsewhere, is not being considered for publication elsewhere and does not duplicate material already published. I confirm all authors consent to publication of this Work and authorise the granting of this licence.

# Concurrent use of opioids and benzodiazepines/Z-drugs in Alberta, Canada and the risk of hospitalization and death: a case crossover study

Vishal Sharma (0000-0001-7907-1183), Scot H Simpson (0000-0002-9880-2129), Salim Samanani (0000-0001-6751-4805), Ed Jess, Dean Eurich (0000-0003-2197-0463)

## **Address for each author**

2-040 Li Ka Shing Center for Health Research Innovation, School of Public Health, University of Alberta, Edmonton, Alberta, Canada, T6G 2E1 [Vishal Sharma BPharm PhD Candidate](#),

Faculty of Pharmacy and Pharmaceutical Sciences, University of Alberta, Edmonton, Alberta, Canada, T6G 2E1 [Scot Simpson professor](#),

OKAKI Health intelligence, Calgary, Alberta, Canada Salim Samanani CEO and Medical Director OKAKI,

The College of Physicians & Surgeons of Alberta, Edmonton, Alberta, Canada, T5J 0N3 Ed Jess Director of Prescribing & Analytics,

2-040 Li Ka Shing Center for Health Research Innovation, School of Public Health, University of Alberta, Edmonton, Alberta, Canada, T6G 2E1 Dean Eurich professor

## **Corresponding Author:**

Dean Eurich, 2-040 Li Ka Shing Center for Health Research Innovation, University of Alberta, Edmonton, Alberta, Canada, T6G 2E1; Phone 780-492-6333; fax 780-492-7455; email: [deurich@ualberta.ca](mailto:deurich@ualberta.ca)

## **Acknowledgement**

This study is based on data provided by The Alberta Strategy for Patient Orientated Research (ABSPOR) SUPPORT unit and Alberta Health. The interpretation and conclusions contained herein are those of the researchers and do not necessarily represent the views of the Government of Alberta, ABSPOR or the College of Physicians & Surgeons of Alberta (CPSA). Neither the Government of Alberta, ABSPOR, Alberta Health nor the CPSA expresses any opinion in relation to this study. This work was supported by Mitacs through the Mitacs Accelerate Program and the College of Physicians & Surgeons of Alberta.

1  
2  
3  
4  
5  
6  
7  
8  
9  
10  
11  
12  
13  
14  
15  
16  
17  
18  
19  
20  
21  
22  
23  
24  
25  
26  
27  
28  
29  
30  
31  
32  
33  
34  
35  
36  
37  
38  
39  
40  
41  
42  
43  
44  
45  
46  
47  
48  
49  
50  
51  
52  
53  
54  
55  
56  
57  
58  
59  
60

For peer review only

1  
2  
3 **Contributors:** VS DE SHS SS and EJ were involved in the conception and design of the study.  
4 VS SHS and DE analyzed the data. VS and DE drafted the article. EJ SHS and SS revised the  
5 article. All authors gave final approval of the version to be published. The corresponding author  
6 attests that all listed authors meet authorship criteria and that no others meeting the criteria have  
7 been omitted. **DE is the guarantor.**  
8  
9

10 **Funding:** This study received no funding.  
11

12 **Copyright/license for publication:** *The Corresponding Author has the right to grant on behalf*  
13 *of all authors and does grant on behalf of all authors, a worldwide licence to the Publishers and*  
14 *its licensees in perpetuity, in all forms, formats and media (whether known now or created in the*  
15 *future), to i) publish, reproduce, distribute, display and store the Contribution, ii) translate the*  
16 *Contribution into other languages, create adaptations, reprints, include within collections and*  
17 *create summaries, extracts and/or, abstracts of the Contribution, iii) create any other derivative*  
18 *work(s) based on the Contribution, iv) to exploit all subsidiary rights in the Contribution, v) the*  
19 *inclusion of electronic links from the Contribution to third party material where-ever it may be*  
20 *located; and, vi) licence any third party to do any or all of the above.*  
21  
22  
23

24 **Competing Interest:** *All authors have completed the ICMJE uniform disclosure form at*  
25 *[www.icmje.org/coi\\_disclosure.pdf](http://www.icmje.org/coi_disclosure.pdf) and declare: no support from any organisation for the*  
26 *submitted work; Salim Samanani has received research grants from the College of*  
27 *Physicians & Surgeons of Alberta; no other relationships or activities that could appear*  
28 *to have influenced the submitted work.*  
29  
30  
31  
32

33  
34 **Ethical approval:** This study was approved by the Health Research Ethics board at the  
35 University of Alberta (#Pro00083807).  
36

37 **Data Sharing:** The data used in this study is not available for external analysis. However,  
38 administrative health data can be accessed from Alberta Health by following defined research  
39 protocols and confidentiality agreements.  
40

41  
42 **Transparency:** The lead author (the manuscript's guarantor, Dean Eurich) affirms that the  
43 manuscript is an honest, accurate, and transparent account of the study being reported; that no  
44 important aspects of the study have been omitted; and that any discrepancies from the study as  
45 originally planned (and, if relevant, registered) have been explained.  
46

47 **Word Count: 2589**  
48  
49  
50  
51  
52  
53  
54  
55  
56  
57

## Abstract

**Objectives:** Co-prescribing of benzodiazepines/Z-drugs (BZDs) and opioids is a drug-use pattern of considerable concern due to risk of adverse events. The objective of this study is to estimate the effect of concurrent use of BZDs on the risk of hospitalizations/emergency department (ED) visits and deaths among opioid users.

**Design, Setting and Participants:** We conducted a population-based case crossover study during 2016-2018 involving Albertans 18 years of age and over who received opioids. From this group, we identified 1,056,773 people who were hospitalized or visited the ED, and 31,998 who died.

**Intervention:** Concurrent use of opioids and BZDs.

**Outcomes:** We estimated the risk of incident all-cause hospitalization/ED visits and all-cause mortality associated with concurrent BZD use by applying a matched-pair analyses comparing concurrent use to opioid only use.

**Results:** Concurrent BZD use occurred in 17% of opioid users (179,805/1,056,773). Overall, concurrent use was associated with higher risk of hospitalization/ED visit (OR 1.13,  $P<0.001$ ) and all cause death (OR 1.90;  $P<0.001$ ). The estimated risk of hospitalization/ED visit was highest in those  $>65$  (OR 1.5;  $P<0.001$ ), using multiple health providers (OR 1.67;  $P<0.001$ ) and  $>365$  days of opioid use (OR 1.76;  $P<0.001$ ). Events due to opioid toxicity were also associated with concurrent use (OR 1.8;  $P<0.001$ ). Opioid dose-response effects among concurrent patients who died were also noted (OR 3.13;  $P<0.001$ ).

**Interpretation:** Concurrent use of opioids and BZDs further contributes to the risk of hospitalization/ED visits and mortality in Alberta, Canada over opioid use alone, with higher opioid doses, older age and increased number of unique health providers carrying higher risks.

1  
2  
3 Regulatory bodies and health providers should reinforce safe drug-use practices and be vigilant  
4  
5 about co-prescribing.  
6  
7  
8  
9

### 10 **Strengths and Limitations**

- 11 • The use of a large population-based sample with near complete capture of all opioid and  
12 benzodiazepine dispensations from community pharmacies in Alberta.
- 13 • The case crossover methodology is a good fit for studies in pharmacoepidemiology like  
14 ours since the effect of many confounders can be substantially controlled,
- 15 • We considered patient sub-groups that have not previously been studied with respect to  
16 concurrent use of opioids and benzodiazepines.
- 17 • We assumed that patients took their medications as prescribed and recorded in the  
18 administrative data set.
- 19 • There is always residual confounding and importantly, unknown factors which may have  
20 changed between the control and case windows could have affected our results.  
21  
22  
23  
24  
25  
26  
27  
28  
29  
30  
31  
32  
33  
34  
35  
36  
37  
38  
39  
40  
41  
42  
43  
44  
45  
46  
47  
48  
49  
50  
51  
52  
53  
54  
55  
56  
57  
58  
59  
60



## Introduction

In the context of the opioid crisis, concurrent use of opioids and BZDs represents a drug use pattern that is of substantial concern because of the increased risk of mortality<sup>1-3</sup>. In Canada and the United States, the policy response to the opioid crisis has focused on establishing guidelines for safe and appropriate prescribing of opioids<sup>1,4</sup>. Although there are no specific clinical guidelines on indications for concurrent use of opioids and BZDs, there are numerous evidence based recommendations warning against concurrent prescribing of these medications<sup>1,4,5</sup> and previous literature suggests that opioids and BZDs cannot be targeted by safe use policies in isolation<sup>6</sup>. Despite these warnings, opioids and BZDs are still being co-prescribed at alarming rates, as shown in our previous work using Alberta data<sup>7</sup>. Data from the US also show an increasing trend in co-prescribing of opioids and BZDs<sup>2,8,9</sup> and 50% of opioid related deaths in Ontario and Manitoba, Canada involved BZDs<sup>10,11</sup>. Furthermore, 2 large studies in the US showed that concurrent use of opioids and BZDs carried a higher risk of hospital admission and mortality than opioid use alone<sup>2,3</sup>. However, the Canadian studies did not quantify the risk associated with concurrent use and the two US studies used populations limited to US military veterans and those that were privately insured which may not be generalizable to the Canadian population.

To our knowledge, no Canadian population-based studies have quantified the effect of concurrent BZD and opioid use on outcomes such as hospitalizations and mortality using the characteristics that we and others have identified as relevant<sup>2,3,7</sup>. A knowledge gap exists on the risks of co-prescribing of these agents, especially when looking at opioid dose, duration of concurrent use, and health care utilization. Using a case crossover study design, we aimed to

1  
2  
3 examine the association between concurrent use of opioids and BZDs and adverse health  
4  
5 outcomes and hypothesized that concurrent use would further increase risk of these outcomes.  
6  
7 Our results will help fill the evidence gap on the adverse outcomes associated with concurrent  
8  
9 prescribing of opioids and BZDs.  
10

## 11 **Methods**

### 12 **Data Sources**

13  
14  
15 Demographic information and dispensation records from community pharmacies were obtained  
16  
17 from Alberta Netcare Pharmaceutical Information Network (PIN). Information on  
18  
19 hospitalizations and ED visits was collected using the Canadian Institute for Health  
20  
21 Information's Discharge Abstract Database and National Ambulatory Care Reporting System.  
22  
23 Physician visits/claims and death records were provided by Alberta Health and Population and  
24  
25 Vital Statistics, respectively. Using anonymized patient level identifiers, these databases were  
26  
27 linked together to establish a complete description of drug exposures and health outcomes. This  
28  
29 study was approved by the health ethics research board at the University of Alberta  
30  
31 (#Pro00083807).  
32  
33  
34  
35  
36  
37

### 38 **Identification of Patients and Outcomes**

39  
40 To maximize use of the data, two distinct analysis cohorts were generated. For the  
41  
42 hospitalization and emergency department (ED) analyses, all subjects in Alberta, Canada who  
43  
44 received a dispensation for an opioid between Jan 1, 2016 and Dec 31, 2018, 18 years of age and  
45  
46 over were included. For mortality analyses, all subjects who received a dispensation for an  
47  
48 opioid between Jan 1, 2016 to Dec 31, 2017 were included. This distinction was required as  
49  
50 mortality data was not yet available for 2018 as reporting is 12-24 months delayed in the  
51  
52 province.  
53  
54  
55  
56  
57

1  
2  
3 Our primary outcomes among the cohort of opioid users were all cause, incident  
4 hospitalizations or ED visits during Jan 1, 2016-Dec 31, 2018 (n=1,056,773) and all cause  
5 mortality during Jan 1, 2016 - Dec 31, 2017 (n=31,998). The secondary outcome was incident  
6 hospitalization or ED visit due to ICD-10 diagnoses related to opioid toxicity (ICD10 F04-F99,  
7 T400-T404, T406) between Jan 1, 2016 and Dec 31, 2018 as this endpoint maybe more specific  
8 to the population using BZD and opioids<sup>12</sup>. The date of the event served as the index date for all  
9 analyses.  
10  
11  
12  
13  
14  
15  
16  
17  
18  
19  
20

## 21 **Exposure**

22  
23 The exposure of interest was whether an opioid patient also used a BZD concurrently during the  
24 study period. We considered “use” as any day on which a patient had a supply of medication on  
25 hand on the basis of the date and days’ supply of each dispensation as others have<sup>2</sup>. As  
26 described in our previous work<sup>7</sup>, for each patient, a day was categorized as concurrent if it was  
27 covered by both an opioid and BZD. For every patient in our opioid cohort, each day of follow  
28 up was categorized into one of four mutually exclusive groups of exposures: **1**) neither opioid  
29 nor BZD use (none), **2**) opioid only use, **3**) BZD only use and **4**) any concurrent use of opioid  
30 and BZD (concurrent). In our case crossover analyses, “none”, “opioid only”, “BZD only” and  
31 “concurrent” refer to drug use during the study windows. We identified opioid and BZD  
32 prescriptions using Anatomical Therapeutic Chemical codes<sup>13</sup> (eTable 1) and included all Health  
33 Canada approved<sup>14</sup> opioid and benzodiazepine/Z-drug formulations which are monitored in the  
34 Alberta Triplicate Prescription Program<sup>15</sup>.  
35  
36  
37  
38  
39  
40  
41  
42  
43  
44  
45  
46  
47  
48  
49  
50

## 51 **Design and Statistical Analyses**

52  
53 An opioid user was defined as anyone who received at least 1 dispensation for an opioid and  
54 concurrent use was defined as at least 1 day of overlap between an opioid and BZD. Health care  
55  
56  
57

1  
2  
3 utilization<sup>16</sup> was defined by number of unique providers visited and number of opioid  
4 prescriptions dispensed. Opioid doses were standardized into oral morphine equivalents (OME)  
5 using conversion factors outlined by the Triplicate Prescription Program<sup>17</sup> in Alberta, Canada.  
6  
7

8  
9  
10 We first conducted a descriptive analysis of our study population and performed pairwise  
11 comparisons between “opioid only users” and “concurrent users” using t-tests and chi<sup>2</sup> tests of  
12 independence. Then, we used the case-crossover design to estimate if concurrent use increased  
13 the risk of our defined outcomes. In a case crossover study, each person serves as their own  
14 control; consequently, eliminating confounding due to age, sex and other fixed patient factors<sup>18</sup>.  
15 This methodology is increasingly being utilized to evaluate exposures encountered in  
16 pharmacoepidemiology and when using administrative databases<sup>18-20</sup>.  
17  
18  
19  
20  
21  
22  
23  
24  
25

26 Conditional logistic regression was used to contrast the four defined exposure groups in  
27 the seven-day risk period immediately before the event with the seven-day control period one  
28 month earlier. We chose the one month time period based on other published  
29 pharmacoepidemiology studies using this methodology<sup>21</sup>. For each of the defined exposure  
30 groups, we estimated the risk of incident hospitalization/ED visits and mortality using odds ratios  
31 and their associated 95 percent confidence intervals. The opioid only exposure group was used  
32 as the reference group in order to estimate the risk of concurrent use relative to opioid only use.  
33 The analyses were stratified into the following sub-groups: sex, age at admission or death, total  
34 days of cumulative concurrency prior to event, total days of previous opioid use, health care  
35 utilization, opioid molecule and dose (OME). All analyses were performed using STATA/MP  
36  
37  
38  
39  
40  
41  
42  
43  
44  
45  
46  
47  
48  
49 15.1 (StataCorp., College Station, TX)  
50

## 51 **Sensitivity Analyses**

52 We performed the primary analyses on a subset of the population that excluded cancer and  
53 palliative patients like others have<sup>3,22</sup> by removing all patients that had relevant ICD codes  
54  
55  
56  
57

1  
2  
3 (ICD9: 140-239, V66.7; ICD10: C00-D49, Z51) at any time between 2012-2018 identified from  
4  
5 the above-mentioned databases. We also performed the analyses after adjusting the length of the  
6  
7 study windows to 3 and 10 days and adding a second control period that preceded the event by 2  
8  
9 weeks.

### 11 **Patient and Public Involvement**

12  
13  
14 This research was done without patient involvement. Patients were not invited to comment on  
15  
16 the study design and were not consulted to develop patient relevant outcomes or interpret the  
17  
18 results. Patients were not invited to contribute to the writing or editing of this document for  
19  
20 readability or accuracy. There are no plans to disseminate the results of the research to study  
21  
22 participants.  
23  
24

### 25 **Results**

26  
27  
28 There were 1,056,773 patients in Alberta classified as opioid users who were hospitalized or  
29  
30 visited the ED during 2016-2018 (Table 1). Among this cohort, 17% (n=179,805) had at least  
31  
32 one day of concurrent use with a BZD during follow-up. Similarly, there were 31,998 patients in  
33  
34 the death cohort and 34.5% (n=11,055) had at least one day of concurrent use.  
35  
36

### 37 **Hospitalizations or ED visits**

38  
39  
40 Compared to opioid only use, concurrent use of opioids and BZDs was associated with an  
41  
42 elevated risk of hospitalization or ED visit ((prevalence of exposure to concurrent use in control  
43  
44 and case windows, respectively: 2.1% vs. 3.3%); OR 1.13; P<0.001; Table 2). After  
45  
46 stratification, those over 65 years of age (3.6% vs. 4.8%; OR 1.5; P<0.001) and those visiting >5  
47  
48 health providers (13.0% vs. 16.5%; OR 1.67; P<0.001) had the highest risk associated with  
49  
50 concurrent use. With respect to total days of concurrency prior to the event, although any  
51  
52 duration of concurrency was associated with an increase in risk, one of the highest risks was  
53  
54  
55  
56  
57  
58  
59  
60

1  
2  
3 observed in those that had concurrent use of less than a month (1-30 days) (1.4% vs. 5.8%; OR  
4 2.47;  $P<0.001$ ; Table 2). Not unexpected, increasing duration of previous use of opioids was  
5  
6 also associated with an increasing estimated risk (Table 2).  
7  
8

9  
10 Among the concurrent patients who were hospitalized or visited an ED, morphine,  
11  
12 oxycodone, hydromorphone and tramadol carried the highest risks when compared to codeine  
13  
14 and used concurrently with BZDs (Figure 1). As expected, there was an opioid dose response  
15  
16 effect on estimated risk where higher OME's had higher risk compared to  $<50$  OME among  
17  
18 concurrent patients (Figure 1). When specific opioid molecules and OME dose ranges were  
19  
20 examined, an increased risk of hospitalization or ED visit was noted for all opioid molecules and  
21  
22 doses when used concurrently with a BZD (Figure 2).  
23  
24  
25

26 In the secondary analysis, the estimated risk of hospitalization or ED visit was also higher  
27  
28 in concurrent patients when compared to opioid only patients for admissions related to opioid  
29  
30 toxicity (OR 1.8;  $P<0.001$ ).  
31  
32

### 33 **Mortality**

34  
35 We identified 31,998 deaths between 2016-2017 in our cohort of opioid users. Estimated  
36  
37 risk of death was substantially higher with concurrent use when compared to opioid only use  
38  
39 when comparing the control and case windows (12.7% vs. 18.6%; OR 1.90;  $P<0.001$ ) with males  
40  
41 having a higher risk than females (Table 3). Among concurrent patients, there was an opioid  
42  
43 dose response effect on estimated risk of death with  $>90$  OME associated with up to triple the  
44  
45 risk when compared to  $<50$  OME group (Table 4). Similar to the trends in hospitalizations or  
46  
47 ED visits, there was an elevated estimated risk of death (12.1% vs. 49.1%; OR 4.93;  $P<0.001$ )  
48  
49 during the first 30 days of cumulative concurrent use (Table 3)  
50  
51  
52

53  
54 In sensitivity analyses, concurrent use was still associated with a higher risk of  
55  
56 hospitalization or ED visits and mortality when compared to opioid only use after adjusting the  
57  
58

length of study windows, number of control windows, and when cancer and palliative patients were excluded.

## Discussion

Many clinical resources warn that BZDs should not be combined with opioids<sup>1,4,5</sup>, yet our study showed a substantial proportion of patients using an opioid did so in combination with a BZD in Alberta, Canada. A concerning trend in adverse outcomes was observed with a near two-fold increased risk of mortality associated with concurrent BZD and opioid use compared to opioid only use. In particular, those age >65 years, those visiting multiple health providers, and higher OME's were at highest relative risks. Importantly, the data also show that one of the highest risks was observed in those that had concurrent use of less than a month with a near 2.5-fold relative increase in hospitalizations or ED visits. Although perceived to be safer, tramadol concurrently used with BZDs had a substantially higher risk than codeine, especially among females.

Our findings are consistent with two large studies done in the United States. Sun et al.<sup>2</sup> reported that 17% of opioid patients concurrently used a BZD and that higher durations of opioid use also carried higher risks of hospitalization or ED visit with respect to concurrent users, findings that we also shared. However, compared to Sun et al, our overall cohort risk was lower (OR 2.14 vs 1.13). This could be due to differences in study population and methodology; the Sun study included privately insured patients and used a retrospective analysis whereas we included all Albertans regardless of coverage and used a case-crossover design. The other study, done by Park et al., estimated risk of death among US veterans exposed to concurrent use of opioids and BZDs<sup>3</sup>. Although both of our studies associated concurrent use of opioids and BZDs with increased risk of death, overall and in an opioid-dose dependent manner, the Park et al risk estimates were much higher than ours, almost double. Of note, however, Park et al

1  
2  
3 included only veterans, which proportionally represented an older population than ours. When  
4  
5 our death analysis was stratified by age, our risk of death estimates were very similar to the Park  
6  
7 et al study. Furthermore, compared with the general population, veterans in the US have a  
8  
9 higher prevalence of substance use disorders and mental illness, which carry their own risks<sup>23-25</sup>.  
10  
11 As other studies have observed, the estimated risk of an opioid-related death from taking 50-90  
12  
13 OME was double when compared to lower OME doses<sup>22</sup>. Estimates from our analyses indicate  
14  
15 that this risk could increase by a factor of 2-3x from the addition of a BZD, depending on the age  
16  
17 of the patient. Indeed, our findings showed that adding a BZD to any opioid molecule and to any  
18  
19 opioid dose multiplied the risk of hospitalization or ED visit or death.  
20  
21  
22

23  
24 Our finding that hospitalization or ED visit and mortality risks were higher during the  
25  
26 initial periods of concurrent use are also similar to another study done in the US<sup>26</sup>. Both of our  
27  
28 estimates associate a higher risk during the first few days of concurrent use as more susceptible  
29  
30 patients may experience adverse outcomes earlier in concurrent use, thus signaling that even  
31  
32 short periods of concurrent use carry risks.  
33  
34

35  
36 The strengths of our study include the large population-based sample with near complete  
37  
38 capture of all opioid and BZD dispensations from community pharmacies using PIN. As well,  
39  
40 hospitalizations and ED visits, and mortality from Alberta Health and Vital Statistics were also  
41  
42 used to identify our outcomes. Since we used a case crossover design, many confounding  
43  
44 variables would have been completely controlled for in our analysis (e.g. age, sex, co-  
45  
46 morbidities) relative to that of other studies conducted to date, however, there could be residual  
47  
48 confounding and bias due to the fact that opioid only users could be different than concurrent  
49  
50 users in characteristics which our data may not adequately capture. Importantly, other unknown  
51  
52 factors which may have changed between the control and case windows could have affected our  
53  
54  
55  
56  
57  
58  
59  
60



1  
2  
3 results. Another limitation is that we are assuming that patients took their medications as  
4 prescribed. Medication adherence in opioid users is a challenging issue <sup>27</sup>.  
5  
6

7  
8 Despite the messages from safe opioid prescribing guidelines<sup>1,4</sup>, our findings show that  
9  
10 Alberta, Canada still experiences troubling trends and risks associated with concurrent use of  
11 opioids and BZDs. Although total prescribed OME's have declined across Canada during the  
12 past few years <sup>28</sup>, the trend with concurrent use of opioids and BZDs is unknown and may in fact  
13 be increasing <sup>2,8</sup>. From a clinical perspective, prescribers should closely follow opioid use  
14 guidelines and avoid concurrent prescribing with BZDs in most clinical scenarios <sup>1,4</sup>. There is an  
15 opportunity for providers to monitor and potentially avoid concurrent use altogether or reassess  
16 for dose tapering. Future research should focus on why health providers and patients continue to  
17 accept and rely on concurrent prescribing of these agents as a form of treatment. Policy makers  
18 and professional regulatory bodies should reinforce safe opioid use prescribing guidelines and  
19 educate providers about the additional risks associated with concurrent use of opioids and BZDs.  
20  
21  
22  
23  
24  
25  
26  
27  
28  
29  
30  
31  
32  
33  
34

### 35 **List of Figures:**

36  
37  
38 Figure 1. Risk of all cause hospitalization or emergency department visits among concurrent  
39 users of opioids and benzodiazepines by molecule and opioid dose using codeine and <50 OME  
40 as reference groups.  
41  
42

43  
44 Figure 2. Risk of hospitalization or emergency department visit comparing specific opioid  
45 molecules and opioid doses used concurrently with BZDs~ to their respective monotherapy  
46 counterparts  
47  
48  
49  
50  
51  
52  
53  
54  
55  
56  
57

**Table 1. Characteristics of opioid users with incident hospitalizations/emergency department visits in the period 2016-2018.**

| Characteristic                               | Total No. (%) of patients~<br>n=1,056,773* | No. (%) of concurrent users~<br>n=179,805@ | No. (%) of opioid only users~<br>n=876,968§ |
|----------------------------------------------|--------------------------------------------|--------------------------------------------|---------------------------------------------|
| <b>opioid users</b>                          | 1,056,773 (100)                            | 179,805 (100)                              | 876,968 (100)                               |
| <b>Number of dispensations for opioids</b>   | 11,240,195(--)                             | 5,855,666 (--)                             | 5,384,529 (--)                              |
| <b>Number of dispensations for BZRA's</b>    | 6,050,709(--)                              | 4,767,945 (--)                             | 1,282,764 (--)**                            |
| <b>Sex:</b>                                  |                                            |                                            |                                             |
| <b>Female</b>                                | 581,457 (55)                               | 109,128 (60.7)                             | 472,411 (53.9)                              |
| <b>Male</b>                                  | 475,316 (45)                               | 70,677 (39.3)                              | 404,557 (46.1)                              |
| <b>Age at admission, year,</b>               |                                            |                                            |                                             |
| <b>median (IQR)</b>                          | 49 (34-62)                                 | 56 (43-67)                                 | 47 (32-61)                                  |
| <b>Mean (SD)</b>                             | 48.7 (18.1)                                | 55.2 (17.0)                                | 47.4 (18.1)                                 |
| <b>10-20</b>                                 | 48,721 (4.6)                               | 2,276 (1.3)                                | 46,445 (5.3)                                |
| <b>21-40</b>                                 | 339,380 (32.1)                             | 36,192 (20.1)                              | 303,188 (34.5)                              |
| <b>41-65</b>                                 | 464,720 (44.0)                             | 90,626 (50.4)                              | 374,094 (42.7)                              |
| <b>&gt;65</b>                                | 203,909 (19.3)                             | 50,708 (28.2)                              | 153,201 (17.5)                              |
| <b>Number of unique prescribers visited,</b> |                                            |                                            |                                             |
| <b>median (IQR)</b>                          | 2 (1-3)                                    | 4 (2-6)                                    | 1 (1-2)                                     |
| <b>Mean (SD)</b>                             | 2.3 (2.2)                                  | 4.5 (3.4)                                  | 1.9 (1.4)                                   |
| <b>1</b>                                     | 508,745 (48.1)                             | 19,252 (10.7)                              | 489,493 (55.8)                              |
| <b>2</b>                                     | 246,935 (23.4)                             | 33,594 (18.7)                              | 213,341 (24.3)                              |
| <b>3</b>                                     | 124,773 (11.8)                             | 33,473 (18.6)                              | 91,300 (10.4)                               |
| <b>4</b>                                     | 66,825 (6.3)                               | 26,573 (14.8)                              | 40,252 (4.6)                                |
| <b>&gt;5</b>                                 | 109,495 (10.4)                             | 66,913 (37.2)                              | 42,582 (4.9)                                |
| <b>Number of unique pharmacies visited,</b>  |                                            |                                            |                                             |
| <b>median (IQR)</b>                          | 2 (1-3)                                    | 3 (2-5)                                    | 2 (1-2)                                     |
| <b>Mean (SD)</b>                             | 2.37 (2.18)                                | 4.1 (3.8)                                  | 2.02 (1.45)                                 |
| <b>1</b>                                     | 431,651 (40.8)                             | 29,486 (16.4)                              | 402,165 (45.8)                              |
| <b>2</b>                                     | 301,730 (28.5)                             | 41,064 (22.8)                              | 260,666 (29.7)                              |
| <b>3</b>                                     | 151,297 (14.3)                             | 33,578 (18.8)                              | 117,710 (13.4)                              |
| <b>4</b>                                     | 73,698 (7.0)                               | 23,356 (13.0)                              | 50,342 (5.7)                                |
| <b>&gt;5</b>                                 | 98,406 (9.3)                               | 52,321 (29.1)                              | 46,085 (5.3)                                |
| <b>Total number of opioid prescriptions</b>  |                                            |                                            |                                             |
| <b>dispensed,</b>                            |                                            |                                            |                                             |
| <b>median (IQR)</b>                          | 2 (1-4)                                    | 8 (2-29)                                   | 1 (1-3)                                     |
| <b>Mean (SD)</b>                             | 9.8 (51.4)                                 | 32.6 (101.5)                               | 5.2 (30.9)                                  |
| <b>1-10</b>                                  | 919,059 (87.0)                             | 100,809 (56.0)                             | 818,250 (93.3)                              |
| <b>11-20</b>                                 | 48,371 (4.6)                               | 22,796 (12.7)                              | 25,575 (2.9)                                |
| <b>20-30</b>                                 | 23,706 (2.2)                               | 13,163 (7.3)                               | 10,543 (1.2)                                |
| <b>&gt;31</b>                                | 65,637 (6.2)                               | 43,037 (23.9)                              | 22,600 (2.6)                                |
| <b>Total cumulative days of opioid use,</b>  |                                            |                                            |                                             |
| <b>Median (IQR)</b>                          | 11 (5-39)                                  | 104 (21-522)                               | 9 (5-23)                                    |
| <b>mean (SD)</b>                             | 94.5 (224)                                 | 297.9 (358.0)                              | 52.8 (154.7)                                |
| <b>1-30</b>                                  | 744,607 (70.5)                             | 54,670 (30.4)                              | 689,937 (78.7)                              |
| <b>31-60</b>                                 | 94,659 (9.0)                               | 20,406 (11.4)                              | 74,253 (8.5)                                |
| <b>61-90</b>                                 | 35,536 (3.4)                               | 10,934 (6.1)                               | 24,602 (2.8)                                |
| <b>&gt;90</b>                                | 181,971 (17.2)                             | 93,795 (52.2)                              | 88,176 (10.1)                               |

**Table 1. Characteristics of opioid users with incident hospitalizations/emergency department visits in the period 2016-2018 (continued)**

|                                                                                                                                                                                                                                                                                                                                                                                                                                                                                                                                                                                                                                                                 |                |                |                |
|-----------------------------------------------------------------------------------------------------------------------------------------------------------------------------------------------------------------------------------------------------------------------------------------------------------------------------------------------------------------------------------------------------------------------------------------------------------------------------------------------------------------------------------------------------------------------------------------------------------------------------------------------------------------|----------------|----------------|----------------|
| Number of people that received a dispensation for specified opioid molecule and daily OME#:                                                                                                                                                                                                                                                                                                                                                                                                                                                                                                                                                                     |                |                |                |
| <b>buprenorphine/naloxone</b>                                                                                                                                                                                                                                                                                                                                                                                                                                                                                                                                                                                                                                   |                |                |                |
| <b>methadone</b>                                                                                                                                                                                                                                                                                                                                                                                                                                                                                                                                                                                                                                                | 7,995 (0.76)   | 3,005 (1.7)    | 7,451 (0.85)   |
| <b>buprenorphine (transdermal patch)</b>                                                                                                                                                                                                                                                                                                                                                                                                                                                                                                                                                                                                                        | 7,394 (0.70)   | 3,218 (1.8)    | 7,043 (0.80)   |
| <b>codeine</b>                                                                                                                                                                                                                                                                                                                                                                                                                                                                                                                                                                                                                                                  | 8,238 (0.78)   | 3,447 (1.9)    | 7,158 (0.82)   |
| <b>morphine</b>                                                                                                                                                                                                                                                                                                                                                                                                                                                                                                                                                                                                                                                 | 738,601 (69.9) | 120,514 (67.0) | 701,243 (80.0) |
| <b>oxycodone</b>                                                                                                                                                                                                                                                                                                                                                                                                                                                                                                                                                                                                                                                | 29,796 (2.8)   | 12,069 (6.7)   | 25,828 (3.0)   |
| <b>oxycodone/naloxone</b>                                                                                                                                                                                                                                                                                                                                                                                                                                                                                                                                                                                                                                       | 119,289 (11.3) | 37,692 (21.0)  | 108,036 (12.3) |
| <b>hydromorphone</b>                                                                                                                                                                                                                                                                                                                                                                                                                                                                                                                                                                                                                                            | 1,163 (0.11)   | 485 (0.27)     | 1,007 (0.12)   |
| <b>fentanyl</b>                                                                                                                                                                                                                                                                                                                                                                                                                                                                                                                                                                                                                                                 | 70,181 (6.6)   | 22,376 (12.4)  | 62,205 (7.1)   |
| <b>tramadol</b>                                                                                                                                                                                                                                                                                                                                                                                                                                                                                                                                                                                                                                                 | 8,888 (0.84)   | 6,279 (3.5)    | 8,067 (0.92)   |
| <b>tapentadol</b>                                                                                                                                                                                                                                                                                                                                                                                                                                                                                                                                                                                                                                               | 316,662 (30.0) | 50,891 (28.3)  | 292,965 (33.4) |
| <b>50 OME<sup>^</sup></b>                                                                                                                                                                                                                                                                                                                                                                                                                                                                                                                                                                                                                                       | 1,570 (0.15)   | 696 (0.39)     | 1,387 (0.16)   |
| <b>50-90 OME<sup>^</sup></b>                                                                                                                                                                                                                                                                                                                                                                                                                                                                                                                                                                                                                                    | 854,759 (86.3) | 154,742 (90.3) | 812,574 (99.2) |
| <b>&gt;90 OME<sup>^</sup></b>                                                                                                                                                                                                                                                                                                                                                                                                                                                                                                                                                                                                                                   | 166,392 (16.8) | 48,642 (28.4)  | 144,629 (17.7) |
| <b>&gt;90 OME<sup>^</sup></b>                                                                                                                                                                                                                                                                                                                                                                                                                                                                                                                                                                                                                                   | 101,837 (10.3) | 40,265 (23.5)  | 86,620 (10.6)  |
| <b>Total days of cumulative concurrency among concurrent users</b>                                                                                                                                                                                                                                                                                                                                                                                                                                                                                                                                                                                              |                |                |                |
| <b>1-30</b>                                                                                                                                                                                                                                                                                                                                                                                                                                                                                                                                                                                                                                                     |                | 92,757 (51.6)  |                |
| <b>31-60</b>                                                                                                                                                                                                                                                                                                                                                                                                                                                                                                                                                                                                                                                    |                | 17,327 (9.6)   |                |
| <b>61-90</b>                                                                                                                                                                                                                                                                                                                                                                                                                                                                                                                                                                                                                                                    |                | 9,006 (5.0)    |                |
| <b>91-180</b>                                                                                                                                                                                                                                                                                                                                                                                                                                                                                                                                                                                                                                                   | N/A            | 14,713 (8.2)   | N/A            |
| <b>181-270</b>                                                                                                                                                                                                                                                                                                                                                                                                                                                                                                                                                                                                                                                  |                | 8,468 (4.7)    |                |
| <b>271-360</b>                                                                                                                                                                                                                                                                                                                                                                                                                                                                                                                                                                                                                                                  |                | 6,270 (3.5)    |                |
| <b>&gt;361</b>                                                                                                                                                                                                                                                                                                                                                                                                                                                                                                                                                                                                                                                  |                | 31,264 (17.4)  |                |
| <b>Elixhauser score<sup>**</sup>:</b>                                                                                                                                                                                                                                                                                                                                                                                                                                                                                                                                                                                                                           |                |                |                |
| <b>Mean (SD)</b>                                                                                                                                                                                                                                                                                                                                                                                                                                                                                                                                                                                                                                                | 2.86 (2.45)    | 4.36 (2.8)     | 2.56 (2.25)    |
| <b>Median (IQR)</b>                                                                                                                                                                                                                                                                                                                                                                                                                                                                                                                                                                                                                                             | 2 (1-4)        | 4 (2-6)        | 2 (1-4)        |
| <p>*n=990,098 for OME analyses<br/>           @n=171,457 for OME analyses<br/>           §n=818,641 for OME analyses<br/>           ~unless otherwise indicated<br/>           # defined as having at least 1 day at specified dose or molecule<br/>           ^OME=oral morphine equivalents, buprenorphine and methadone dropped from OME analysis<br/>           **Determined using Physician Claims data from 2012-2016<br/>           ***If patients had BZD use outside of the study windows, then this was captured in our summary statistics.<br/>           Note: All pairwise comparisons between concurrent and opioid only users had p&lt;0.001</p> |                |                |                |

**Table 2. Risk of all cause hospitalization or emergency department visits in people using opioids and benzodiazepine receptor modulators during 2016-2018.**

| Patient Group                                | Analysis Group* |           |                         |  |                                  |           |               |           |
|----------------------------------------------|-----------------|-----------|-------------------------|--|----------------------------------|-----------|---------------|-----------|
|                                              | None            |           | Opioid only (reference) |  | Benzodiazepine <sup>^</sup> only |           | Concurrent    |           |
|                                              | OR (p-value)    | 95% CI    | OR                      |  | OR (p-value)                     | 95% CI    | OR (p-value)  | 95% CI    |
| <b>Overall population</b>                    | 0.21 (<0.001)   | 0.20-0.21 | 1                       |  | 0.46 (<0.001)                    | 0.45-0.48 | 1.13 (<0.001) | 1.10-1.17 |
| <b>Sex:</b>                                  |                 |           |                         |  |                                  |           |               |           |
| <b>Female</b>                                | 0.24 (<0.001)   | 0.23-0.25 | 1                       |  | 0.51 (<0.001)                    | 0.49-0.52 | 1.19 (<0.001) | 1.14-1.23 |
| <b>Male</b>                                  | 0.18 (<0.001)   | 0.18-0.19 | 1                       |  | 0.43 (<0.001)                    | 0.41-0.45 | 1.10 (<0.001) | 1.05-1.16 |
| <b>Age at admission:</b>                     |                 |           |                         |  |                                  |           |               |           |
| <b>20-40</b>                                 | 0.16 (<0.001)   | 0.15-0.16 | 1                       |  | 0.33 (<0.001)                    | 0.31-0.35 | 0.96 (0.33)   | 0.88-1.04 |
| <b>40-65</b>                                 | 0.23 (<0.001)   | 0.22-0.23 | 1                       |  | 0.48 (<0.001)                    | 0.46-0.50 | 1.12 (<0.001) | 1.07-1.18 |
| <b>&gt;65</b>                                | 0.30 (<0.001)   | 0.29-0.31 | 1                       |  | 0.73 (<0.001)                    | 0.69-0.77 | 1.50 (<0.001) | 1.39-1.61 |
| <b>Total days of cumulative concurrency:</b> |                 |           |                         |  |                                  |           |               |           |
| <b>1-30</b>                                  | 0.33 (<0.001)   | 0.31-0.35 | 1                       |  | 0.72 (<0.001)                    | 0.67-0.78 | 2.47 (<0.001) | 2.26-2.70 |
| <b>31-90</b>                                 | 0.45 (<0.001)   | 0.41-0.49 | 1                       |  | 1.05 (0.36)                      | 0.95-1.17 | 1.50 (<0.001) | 1.34-1.67 |
| <b>91-180</b>                                | 0.44 (<0.001)   | 0.39-0.49 | 1                       |  | 1.09 (0.24)                      | 0.95-1.24 | 1.45 (<0.001) | 1.28-1.64 |
| <b>181-365</b>                               | 0.42 (<0.001)   | 0.37-0.48 | 1                       |  | 1.11 (<0.11)                     | 0.97-1.3  | 1.57 (<0.001) | 1.40-1.76 |
| <b>&gt;365</b>                               | 0.26 (<0.001)   | 0.23-0.29 | 1                       |  | 1.26 (<0.001)                    | 1.11-1.41 | 1.82 (<0.001) | 1.67-1.99 |
| <b>&gt;900</b>                               | 0.13 (<0.001)   | 0.09-0.21 | 1                       |  | 1.64 (0.01)                      | 1.12-2.38 | 3.15 (<0.001) | 2.41-4.11 |
| <b>Total days of opioid use:</b>             |                 |           |                         |  |                                  |           |               |           |
| <b>1-7</b>                                   | 0.04 (<0.001)   | 0.03-0.05 | 1                       |  | 0.08 (<0.001)                    | 0.07-0.09 | 0.90 (0.40)   | 0.72-1.14 |
| <b>8-30</b>                                  | 0.15 (<0.001)   | 0.14-0.16 | 1                       |  | 0.30 (<0.001)                    | 0.28-0.32 | 1.21 (0.002)  | 1.07-1.38 |
| <b>31-90</b>                                 | 0.34 (<0.001)   | 0.33-0.35 | 1                       |  | 0.71 (<0.001)                    | 0.66-0.76 | 1.36 (<0.001) | 1.22-1.51 |
| <b>91-180</b>                                | 0.48 (<0.001)   | 0.46-0.51 | 1                       |  | 1.05 (0.35)                      | 0.95-1.15 | 1.54 (<0.001) | 1.37-1.73 |
| <b>181-365</b>                               | 0.54 (<0.001)   | 0.52-0.57 | 1                       |  | 1.27 (<0.001)                    | 1.15-1.40 | 1.73 (<0.001) | 1.56-1.92 |
| <b>&gt;365</b>                               | 0.41 (<0.001)   | 0.39-0.42 | 1                       |  | 1.21 (<0.001)                    | 1.12-1.32 | 1.76 (<0.001) | 1.66-1.86 |

**Table 2. Risk of all cause hospitalization or emergency department visits in people using opioids and benzodiazepine receptor modulators during 2016-2018 (continued)**

|                                        |               |           |   |  |               |           |               |           |
|----------------------------------------|---------------|-----------|---|--|---------------|-----------|---------------|-----------|
| <b>Number of opioid dispensations:</b> |               |           |   |  |               |           |               |           |
| <b>1-10</b>                            | 0.16 (<0.001) | 0.16-0.17 | 1 |  | 0.34 (<0.001) | 0.33-0.35 | 0.93 (0.01)   | 0.87-0.98 |
| <b>11-30</b>                           | 0.49 (<0.001) | 0.47-0.51 | 1 |  | 1.20 (<0.001) | 1.11-1.30 | 1.62 (<0.001) | 1.50-1.74 |
| <b>&gt;30</b>                          | 0.35 (<0.001) | 0.33-0.37 | 1 |  | 1.09 (0.10)   | 0.98-1.21 | 1.77 (<0.001) | 1.65-1.89 |
| <b>Number of unique prescribers:</b>   |               |           |   |  |               |           |               |           |
| <b>1</b>                               | 0.14 (<0.001) | 0.13-0.14 | 1 |  | 0.30 (<0.001) | 0.28-0.32 | 0.73 (<0.001) | 0.65-0.81 |
| <b>2</b>                               | 0.20 (<0.001) | 0.19-0.20 | 1 |  | 0.41 (<0.001) | 0.39-0.43 | 1.02 (0.64)   | 0.94-1.11 |
| <b>3</b>                               | 0.26 (<0.001) | 0.25-0.27 | 1 |  | 0.51 (<0.001) | 0.48-0.54 | 1.30 (<0.001) | 1.19-1.42 |
| <b>4</b>                               | 0.32 (<0.001) | 0.31-0.34 | 1 |  | 0.68 (<0.001) | 0.63-0.73 | 1.54 (<0.001) | 1.39-1.70 |
| <b>&gt;5</b>                           | 0.38 (<0.001) | 0.37-0.40 | 1 |  | 0.91 (<0.001) | 0.86-0.96 | 1.67 (<0.001) | 1.57-1.77 |
| <b>Number of unique pharmacies:</b>    |               |           |   |  |               |           |               |           |
| <b>1</b>                               | 0.14 (<0.001) | 0.13-0.15 | 1 |  | 0.32 (<0.001) | 0.31-0.35 | 0.95 (0.25)   | 0.86-1.04 |
| <b>2</b>                               | 0.20 (<0.001) | 0.19-0.21 | 1 |  | 0.45 (<0.001) | 0.43-0.48 | 1.12 (0.007)  | 1.03-1.21 |
| <b>3</b>                               | 0.27 (<0.001) | 0.26-0.28 | 1 |  | 0.56 (<0.001) | 0.52-0.59 | 1.24 (<0.001) | 1.14-1.35 |
| <b>4</b>                               | 0.31 (<0.001) | 0.29-0.33 | 1 |  | 0.66 (<0.001) | 0.61-0.71 | 1.47 (<0.001) | 1.33-1.64 |
| <b>&gt;5</b>                           | 0.39 (<0.001) | 0.38-0.41 | 1 |  | 0.78 (<0.001) | 0.73-0.83 | 1.47 (<0.001) | 1.38-1.57 |

**Note: CI = confidence interval, OR=odds ratio**

**\* Risk interval= seven days before hospitalization/emergency visit; control interval= seven-day period one month before hospitalization/emergency department visit**

**^includes all benzodiazepine receptor modulators**

**Table 3. Risk of all cause death in 2016-2017 among opioid users and subgroups of patients. N=31,998**

| Patient Category                             | Analysis Group |           |                                  |                      |           |               |           |  |
|----------------------------------------------|----------------|-----------|----------------------------------|----------------------|-----------|---------------|-----------|--|
|                                              | None           |           | Opioid only<br>(reference group) | Benzodiazepine^ only |           | Concurrent    |           |  |
|                                              | OR (p-value)   | 95% CI    | OR (p-value)                     | OR (p-value)         | 95% CI    | OR (p-value)  | 95% CI    |  |
| <b>Overall population</b>                    | 0.67 (<0.001)  | 0.64-0.71 | 1                                | 0.76 (<0.001)        | 0.69-0.83 | 1.90 (<0.001) | 1.76-2.05 |  |
| <b>Female</b>                                | 0.64 (<0.001)  | 0.60-0.70 | 1                                | 0.68 (<0.001)        | 0.60-0.78 | 1.73 (<0.001) | 1.56-1.92 |  |
| <b>Male</b>                                  | 0.70 (<0.001)  | 0.62-0.76 | 1                                | 0.85 (0.02)          | 0.75-0.97 | 2.09 (<0.001) | 1.87-2.33 |  |
| <b>Age at death:</b>                         |                |           |                                  |                      |           |               |           |  |
| <b>18-45</b>                                 | 1.20 (0.13)    | 0.94-1.54 | 1                                | 1.98 (<0.001)        | 1.38-2.86 | 2.26 (<0.001) | 1.63-3.13 |  |
| <b>46-65</b>                                 | 1.13 (0.03)    | 1.01-1.28 | 1                                | 1.24 (0.03)          | 1.02-1.51 | 2.20 (<0.001) | 1.90-2.55 |  |
| <b>&gt;65</b>                                | 0.56 (<0.001)  | 0.52-0.60 | 1                                | 0.61 (<0.001)        | 0.54-0.68 | 1.79 (<0.001) | 1.63-1.97 |  |
| <b>Total days of cumulative concurrency:</b> |                |           |                                  |                      |           |               |           |  |
| <b>1-30</b>                                  | 0.82 (0.007)   | 0.71-0.95 | 1                                | 0.88 (0.17)          | 0.74-1.05 | 4.93 (<0.001) | 4.29-5.66 |  |
| <b>31-90</b>                                 | 2.4 (<0.001)   | 1.84-3.15 | 1                                | 1.18 (0.21)          | 0.91-1.56 | 1.41 (<0.001) | 1.14-1.74 |  |
| <b>91-180</b>                                | 2.39 (<0.001)  | 1.58-3.60 | 1                                | 1.74 (0.01)          | 1.12-2.68 | 0.80 (0.20)   | 0.56-1.12 |  |
| <b>181-365</b>                               | 4.27 (<0.001)  | 2.58-7.07 | 1                                | 1.54 (0.08)          | 0.94-2.51 | 0.92 (0.66)   | 0.63-1.33 |  |
| <b>&gt;365</b>                               | 1.53 (0.26)    | 0.73-3.24 | 1                                | 1.17 (0.71)          | 0.51-2.72 | 0.39 (0.003)  | 0.21-0.72 |  |

Table 3. Risk of all cause death in 2016-2017 among opioid users and subgroups of patients. *N=31,998 (continued)*

|                                        |               |           |   |  |               |           |               |           |
|----------------------------------------|---------------|-----------|---|--|---------------|-----------|---------------|-----------|
| <b>Total days of opioid use:</b>       |               |           |   |  |               |           |               |           |
| <b>1-7</b>                             | 0.14 (<0.001) | 0.11-0.17 | 1 |  | 0.17 (<0.001) | 0.12-0.23 | 2.78 (<0.001) | 1.79-4.32 |
| <b>8-30</b>                            | 0.38 (<0.001) | 0.34-0.42 | 1 |  | 0.48 (<0.001) | 0.40-0.59 | 2.29 (<0.001) | 1.89-2.78 |
| <b>31-90</b>                           | 1.03 (0.56)   | 0.92-1.16 | 1 |  | 1.46 (<0.001) | 1.19-1.78 | 2.58 (<0.001) | 2.22-3.00 |
| <b>91-180</b>                          | 2.08 (<0.001) | 1.75-2.48 | 1 |  | 2.62 (<0.001) | 1.96-3.51 | 2.16 (<0.001) | 1.80-2.60 |
| <b>181-365</b>                         | 2.66 (<0.001) | 2.18-3.24 | 1 |  | 3.13 (<0.001) | 2.24-4.38 | 1.83 (<0.001) | 1.50-2.23 |
| <b>&gt;365</b>                         | 2.83 (<0.001) | 2.16-3.71 | 1 |  | 2.41 (<0.001) | 1.51-3.87 | 1.20 (0.15)   | 0.93-1.53 |
| <b>Number of opioid dispensations:</b> |               |           |   |  |               |           |               |           |
| <b>1-10</b>                            | 0.41 (<0.001) | 0.38-0.44 | 1 |  | 0.45 (<0.001) | 0.39-0.51 | 2.23 (<0.001) | 1.96-2.54 |
| <b>11-30</b>                           | 1.36 (<0.001) | 1.20-1.54 | 1 |  | 1.72 (<0.001) | 1.41-2.11 | 2.70 (<0.001) | 2.34-3.12 |
| <b>&gt;30</b>                          | 2.11 (<0.001) | 1.83-2.44 | 1 |  | 1.82 (<0.001) | 1.46-2.28 | 1.40 (<0.001) | 1.21-1.62 |
| <b>Number of unique prescribers:</b>   |               |           |   |  |               |           |               |           |
| <b>1</b>                               | 0.31 (<0.001) | 0.27-0.36 | 1 |  | 0.49 (<0.001) | 0.32-0.74 | 2.50 (<0.001) | 1.76-3.56 |
| <b>2</b>                               | 0.51 (<0.001) | 0.44-0.58 | 1 |  | 0.63 (<0.001) | 0.48-0.81 | 2.29 (<0.001) | 1.81-2.90 |
| <b>3</b>                               | 0.60 (<0.001) | 0.52-0.69 | 1 |  | 0.71 (0.004)  | 0.56-0.90 | 2.03 (<0.001) | 1.64-2.52 |
| <b>4</b>                               | 0.75 (<0.001) | 0.64-0.87 | 1 |  | 0.82 (0.12)   | 0.64-1.05 | 2.49 (<0.001) | 2.01-3.08 |
| <b>&gt;5</b>                           | 1.36 (<0.001) | 1.23-1.50 | 1 |  | 1.10 (0.15)   | 0.96-1.26 | 2.01 (<0.001) | 1.82-2.24 |

**Table 3. Risk of all cause death in 2016-2017 among opioid users and subgroups of patients. N=31,998 (continued)**

| Number of unique pharmacies: |               |           |   |               |           |               |           |  |
|------------------------------|---------------|-----------|---|---------------|-----------|---------------|-----------|--|
| 1                            | 0.54 (<0.001) | 0.50-0.60 | 1 | 0.72 (<0.001) | 0.60-0.87 | 1.41 (<0.001) | 1.20-1.66 |  |
| 2                            | 0.65 (<0.001) | 0.59-0.71 | 1 | 0.74 (<0.001) | 0.62-0.87 | 2.09 (<0.001) | 1.82-2.40 |  |
| 3                            | 0.73 (<0.001) | 0.64-0.84 | 1 | 0.78 (0.018)  | 0.63-0.96 | 2.48 (<0.001) | 2.09-2.93 |  |
| 4                            | 0.99 (0.96)   | 0.81-1.21 | 1 | 0.82 (0.18)   | 0.61-1.10 | 2.20 (<0.001) | 1.76-2.76 |  |
| >5                           | 1.30 (0.01)   | 1.06-1.59 | 1 | 1.14 (0.33)   | 0.88-1.48 | 1.81 (<0.001) | 1.47-2.24 |  |

**Note:** OR= odds ratio; 95% CI= 95% confidence interval; Risk interval= seven days before death; control interval= seven-day period one month before death

^benzodiazepine receptor modulator (includes Z-drugs)



**Table 4. Risk of all cause death in 2016-2017 among patients co-prescribed BZDs and opioids stratified by OME (n=31,998)**

| Category                  | <50<br>(reference group) | OME                        |                            |
|---------------------------|--------------------------|----------------------------|----------------------------|
|                           |                          | 50-90                      | >90                        |
|                           | OR (p-value)<br>95% CI   | OR (p-value)<br>95% CI     | OR (p-value)<br>95% CI     |
| <b>Overall population</b> | 1                        | 1.72 (<0.001)<br>1.35-2.19 | 3.13 (<0.001)<br>2.50-3.92 |
| <b>Female</b>             | 1                        | 1.76 (<0.001)<br>1.25-2.48 | 3.22 (<0.001)<br>2.35-4.40 |
| <b>Male</b>               | 1                        | 1.68 (0.003)<br>1.19-2.37  | 3.04 (<0.001)<br>2.20-4.19 |
| <b>Age at death:</b>      |                          |                            |                            |
| <b>18-45</b>              | 1                        | 0.90 (0.83)<br>0.35-2.31   | 2.31 (0.08)<br>0.92-5.85   |
| <b>46-65</b>              | 1                        | 2.19 (<0.001)<br>1.41-3.39 | 2.78 (<0.001)<br>1.84-4.18 |
| <b>&gt;65</b>             | 1                        | 1.60 (0.003)<br>1.18-2.18  | 3.41 (<0.001)<br>2.57-4.52 |

**Note:** BZD: benzodiazepines/Z-drugs; OME: Oral morphine equivalents, <50 OME category is the reference group;

Buprenorphine and methadone were excluded

## References

1. Dowell D. CDC guideline for prescribing opioids for chronic pain. 2016.
2. Sun EC, Dixit A, Humphreys K, Darnall BD, Baker LC, Mackey S. Association between concurrent use of prescription opioids and benzodiazepines and overdose: retrospective analysis. *BMJ*. 2017;356:j760.
3. Park TW, Saitz R, Ganoczy D, Ilgen MA, Bohnert AS. Benzodiazepine prescribing patterns and deaths from drug overdose among US veterans receiving opioid analgesics: case-cohort study. *BMJ*. 2015;350:h2698.
4. Busse JW, Craigie S, Juurlink DN, et al. Guideline for opioid therapy and chronic noncancer pain. *Canadian Medical Association Journal*. 2017;189(18):E659-E666.
5. ismp Canada. Essential Clinical Skills for Opioid Prescribers. 2017; <https://www.ismp-canada.org/download/OpioidStewardship/Opioid-Prescribing-Skills.pdf>. Accessed Nov 2018.
6. Jones JD, Mogali S, Comer SD. Polydrug abuse: a review of opioid and benzodiazepine combination use. *Drug and alcohol dependence*. 2012;125(1-2):8-18.
7. Sharma V, Weir D, Samanani S, et al. Characterisation of concurrent use of prescription opioids and benzodiazepine/Z-drugs in Alberta, Canada: a population-based study. *BMJ open*. 2019;9(9):e030858.
8. Hwang CS, Kang EM, Kornegay CJ, Staffa JA, Jones CM, McAninch JK. Trends in the Concomitant Prescribing of Opioids and Benzodiazepines, 2002-2014. *Am J Prev Med*. 2016;51(2):151-160.
9. Vozoris NT. Benzodiazepine and opioid co-usage in the US population, 1999–2014: an exploratory analysis. *Sleep*. 2019;42(4).
10. Gomes T. *Latest trends in opioid-related deaths in Ontario: 1991 to 2015*. Ontario Drug Policy Research Network; 2017.
11. Manitoba Health. Surveillance of Opioid Misuse and Overdose in Manitoba. [Internet]. 2017; [https://www.gov.mb.ca/health/publichealth/surveillance/docs/opioid/2017/q1\\_opioid.pdf](https://www.gov.mb.ca/health/publichealth/surveillance/docs/opioid/2017/q1_opioid.pdf).
12. Gomes T, Khuu W, Martins D, et al. Contributions of prescribed and non-prescribed opioids to opioid related deaths: population based cohort study in Ontario, Canada. *BMJ*. 2018;362:k3207.
13. World Health Organization. International language for drug utilization research, ATC/DDD. 2020; <https://www.whooc.no/>. Accessed Jun 2020, 2020.
14. Government of Canada. Drug Product Database online query. 2020; <https://health-products.canada.ca/dpd-bdpp/index-eng.jsp>. Accessed June 2020.
15. College of Physicians and Surgeons of Alberta. TPP ALBERTA MEDICATIONS LIST. *Triplicate Prescription Program 2020*; <http://www.cpsa.ca/tpp/tpp-medication-list/>. Accessed Jun 2020.
16. Lorig KR, Ritter P, Stewart AL, et al. Chronic Disease Self-Management Program: 2-Year Health Status and Health Care Utilization Outcomes. *Medical Care*. 2001;39(11):1217-1223.
17. College of Physicians and Surgeons of Alberta. TPP Alberta – OME and DDD Conversion Factors. 2020; <http://www.cpsa.ca/tpp/>. Accessed Jun 2020.
18. Maclure M, Mittleman aMA. Should We Use a Case-Crossover Design? *Annual Review of Public Health*. 2000;21(1):193-221.
19. Hallas J, Pottegård A. Use of self-controlled designs in pharmacoepidemiology. *Journal of Internal Medicine*. 2014;275(6):581-589.

- 1
  - 2
  - 3
  - 4
  - 5
  - 6
  - 7
  - 8
  - 9
  - 10
  - 11
  - 12
  - 13
  - 14
  - 15
  - 16
  - 17
  - 18
  - 19
  - 20
  - 21
  - 22
  - 23
  - 24
  - 25
  - 26
  - 27
  - 28
  - 29
  - 30
  - 31
  - 32
  - 33
  - 34
  - 35
  - 36
  - 37
  - 38
  - 39
  - 40
  - 41
  - 42
  - 43
  - 44
  - 45
  - 46
  - 47
20. Schneeweiss S, Sturmer T, Maclure M. <Case crossover and case-time-control design\_Pharmacoepi & Drug Safety 1997.pdf>. 1997.
21. Wright AJ, Gomes T, Mamdani MM, Horn JR, Juurlink DN. The risk of hypotension following co-prescription of macrolide antibiotics and calcium-channel blockers. *Canadian Medical Association Journal*. 2011;183(3):303-307.
22. Gomes T, Mamdani MM, Dhalla IA, Paterson JM, Juurlink DN. Opioid Dose and Drug-Related Mortality in Patients With Nonmalignant Pain Opioid Dose and Drug-related Mortality. *JAMA Internal Medicine*. 2011;171(7):686-691.
23. Vazan P, Golub A, Bennett AS. Substance use and other mental health disorders among veterans returning to the inner city: Prevalence, correlates, and rates of unmet treatment need. *Substance use & misuse*. 2013;48(10):880-893.
24. Lan CW, Fiellin DA, Barry DT, et al. The epidemiology of substance use disorders in US Veterans: A systematic review and analysis of assessment methods. *The American journal on addictions*. 2016;25(1):7-24.
25. Wagner TH, Harris KM, Federman B, Dai L, Luna Y, Humphreys K. Prevalence of substance use disorders among veterans and comparable nonveterans from the National Survey on Drug Use and Health. *Psychological Services*. 2007;4(3):149.
26. Hernandez I, He M, Brooks MM, Zhang Y. Exposure-Response Association Between Concurrent Opioid and Benzodiazepine Use and Risk of Opioid-Related Overdose in Medicare Part D Beneficiaries. *JAMA Netw Open*. 2018;1(2):e180919.
27. Graziottin A, Gardner-Nix J, Stumpf M, Berliner MN. Opioids: How to Improve Compliance and Adherence. *Pain Practice*. 2011;11(6):574-581.
28. Abdesselam K, Dann MJ, Alwis R, Laroche J, Iлека-Priouzeau S. At-a-glance - Opioid surveillance: monitoring and responding to the evolving crisis. *Health Promot Chronic Dis Prev Can*. 2018;38(9):312-316.

**Figure 1. Risk of all cause hospitalization or emergency department visits among concurrent users of opioids and benzodiazepines by molecule and opioid dose\* using codeine and <50 OME\* as reference groups.**



**Note: bars represent 95% confidence intervals**

**\*Dose is oral morphine equivalents (OME) and <50 OME is the reference. Buprenorphine and methadone have been excluded.**

**Figure 2. Risk of hospitalization or emergency department visit comparing specific opioid molecules and opioid doses\* used concurrently with BZDs~ to their respective monotherapy counterparts^**



**Note: bars represent 95% confidence intervals**

**\*Opioid dose is oral morphine equivalents (OME); buprenorphine and methadone have been excluded**

**~Benzodiazepine receptor modulator (includes Z-drugs)**

**^For example, the odds ratio plotted for codeine represents the risk of codeine + BZD compared to codeine alone and that of <50 OME represents the risk of <50 OME + BZD compared to <50 OME alone**

## eAppendix

**eTable 1. ATC codes (Anatomical Therapeutic Chemical codes) used to identify opioid and benzodiazepine/Z-drug prescriptions from prescription data (Pharmaceutical Information Network)**

| <b>Opioid</b> | <b>ATC Code</b> | <b>4<sup>th</sup> Level Sub-Group</b>             |
|---------------|-----------------|---------------------------------------------------|
|               | N02AF           | Morphinan derivatives                             |
|               | N02AG           | Opioids in combination with antispasmodics        |
|               | N02AE           | Oripavine derivatives                             |
|               | N02AD           | Benzomorphan derivatives                          |
|               | N02AC           | Diphenylpropylamine derivatives                   |
|               | N02AB           | Phenylpiperidine derivatives                      |
|               | N02AA           | Natural opium alkaloids                           |
|               | N07BC           | Drugs used in opioid dependence                   |
|               | N01AH           | Opioid anesthetics                                |
|               | R05DA           | Opium alkaloids and derivatives                   |
|               | N02AJ           | Opioids in combination with non-opioid analgesics |
|               | N02AX           | Other opioids                                     |
| <b>BZRA</b>   |                 |                                                   |
|               | N03AE           | Benzodiazepine derivatives                        |
|               | N05BA           | Benzodiazepine derivatives                        |
|               | N05CD           | Benzodiazepine derivatives                        |
|               | N05CF           | Benzodiazepine related drugs                      |

BZRA: benzodiazepine/Z-drug

## STROBE Statement—checklist of items that should be included in reports of observational studies

|                              | Item No | Recommendation                                                                                                                                                                                                                                                                                                                                                                                                                                                         | Page No |
|------------------------------|---------|------------------------------------------------------------------------------------------------------------------------------------------------------------------------------------------------------------------------------------------------------------------------------------------------------------------------------------------------------------------------------------------------------------------------------------------------------------------------|---------|
| <b>Title and abstract</b>    | 1       | (a) Indicate the study's design with a commonly used term in the title or the abstract                                                                                                                                                                                                                                                                                                                                                                                 | 1       |
|                              |         | (b) Provide in the abstract an informative and balanced summary of what was done and what was found                                                                                                                                                                                                                                                                                                                                                                    | 2       |
| <b>Introduction</b>          |         |                                                                                                                                                                                                                                                                                                                                                                                                                                                                        |         |
| Background/rationale         | 2       | Explain the scientific background and rationale for the investigation being reported                                                                                                                                                                                                                                                                                                                                                                                   | 4       |
| Objectives                   | 3       | State specific objectives, including any prespecified hypotheses                                                                                                                                                                                                                                                                                                                                                                                                       | 5       |
| <b>Methods</b>               |         |                                                                                                                                                                                                                                                                                                                                                                                                                                                                        |         |
| Study design                 | 4       | Present key elements of study design early in the paper                                                                                                                                                                                                                                                                                                                                                                                                                | 6       |
| Setting                      | 5       | Describe the setting, locations, and relevant dates, including periods of recruitment, exposure, follow-up, and data collection                                                                                                                                                                                                                                                                                                                                        | 5-6     |
| Participants                 | 6       | (a) <i>Cohort study</i> —Give the eligibility criteria, and the sources and methods of selection of participants. Describe methods of follow-up<br><i>Case-control study</i> —Give the eligibility criteria, and the sources and methods of case ascertainment and control selection. Give the rationale for the choice of cases and controls<br><i>Cross-sectional study</i> —Give the eligibility criteria, and the sources and methods of selection of participants | 5-6     |
|                              |         | (b) <i>Cohort study</i> —For matched studies, give matching criteria and number of exposed and unexposed<br><i>Case-control study</i> —For matched studies, give matching criteria and the number of controls per case                                                                                                                                                                                                                                                 | 5-6     |
| Variables                    | 7       | Clearly define all outcomes, exposures, predictors, potential confounders, and effect modifiers. Give diagnostic criteria, if applicable                                                                                                                                                                                                                                                                                                                               | 6-7     |
| Data sources/<br>measurement | 8*      | For each variable of interest, give sources of data and details of methods of assessment (measurement). Describe comparability of assessment methods if there is more than one group                                                                                                                                                                                                                                                                                   | 5       |
| Bias                         | 9       | Describe any efforts to address potential sources of bias                                                                                                                                                                                                                                                                                                                                                                                                              | 7       |
| Study size                   | 10      | Explain how the study size was arrived at                                                                                                                                                                                                                                                                                                                                                                                                                              | 5       |
| Quantitative variables       | 11      | Explain how quantitative variables were handled in the analyses. If applicable, describe which groupings were chosen and why                                                                                                                                                                                                                                                                                                                                           | 6       |
| Statistical methods          | 12      | (a) Describe all statistical methods, including those used to control for confounding                                                                                                                                                                                                                                                                                                                                                                                  | 7       |
|                              |         | (b) Describe any methods used to examine subgroups and interactions                                                                                                                                                                                                                                                                                                                                                                                                    | 7       |
|                              |         | (c) Explain how missing data were addressed                                                                                                                                                                                                                                                                                                                                                                                                                            |         |
|                              | 7       | (d) <i>Cohort study</i> —If applicable, explain how loss to follow-up was addressed<br><i>Case-control study</i> —If applicable, explain how matching of cases and controls was addressed<br><i>Cross-sectional study</i> —If applicable, describe analytical methods taking account of sampling strategy                                                                                                                                                              |         |
|                              |         | (e) Describe any sensitivity analyses                                                                                                                                                                                                                                                                                                                                                                                                                                  | 8       |

Continued on next page

| <b>Results</b>           |     |                                                                                                                                                                                                                                                                                                                                                                                                               |       |
|--------------------------|-----|---------------------------------------------------------------------------------------------------------------------------------------------------------------------------------------------------------------------------------------------------------------------------------------------------------------------------------------------------------------------------------------------------------------|-------|
| Participants             | 13* | (a) Report numbers of individuals at each stage of study—eg numbers potentially eligible, examined for eligibility, confirmed eligible, included in the study, completing follow-up, and analysed<br>(b) Give reasons for non-participation at each stage<br>(c) Consider use of a flow diagram                                                                                                               | 8     |
| Descriptive data         | 14* | (a) Give characteristics of study participants (eg demographic, clinical, social) and information on exposures and potential confounders<br>(b) Indicate number of participants with missing data for each variable of interest<br>(c) <i>Cohort study</i> —Summarise follow-up time (eg, average and total amount)                                                                                           | 13    |
| Outcome data             | 15* | <i>Cohort study</i> —Report numbers of outcome events or summary measures over time<br><i>Case-control study</i> —Report numbers in each exposure category, or summary measures of exposure<br><i>Cross-sectional study</i> —Report numbers of outcome events or summary measures                                                                                                                             | 8-9   |
| Main results             | 16  | (a) Give unadjusted estimates and, if applicable, confounder-adjusted estimates and their precision (eg, 95% confidence interval). Make clear which confounders were adjusted for and why they were included<br>(b) Report category boundaries when continuous variables were categorized<br>(c) If relevant, consider translating estimates of relative risk into absolute risk for a meaningful time period | 8-9   |
| Other analyses           | 17  | Report other analyses done—eg analyses of subgroups and interactions, and sensitivity analyses                                                                                                                                                                                                                                                                                                                | 9     |
| <b>Discussion</b>        |     |                                                                                                                                                                                                                                                                                                                                                                                                               |       |
| Key results              | 18  | Summarise key results with reference to study objectives                                                                                                                                                                                                                                                                                                                                                      | 10    |
| Limitations              | 19  | Discuss limitations of the study, taking into account sources of potential bias or imprecision. Discuss both direction and magnitude of any potential bias                                                                                                                                                                                                                                                    | 11    |
| Interpretation           | 20  | Give a cautious overall interpretation of results considering objectives, limitations, multiplicity of analyses, results from similar studies, and other relevant evidence                                                                                                                                                                                                                                    | 11-12 |
| Generalisability         | 21  | Discuss the generalisability (external validity) of the study results                                                                                                                                                                                                                                                                                                                                         | 11-12 |
| <b>Other information</b> |     |                                                                                                                                                                                                                                                                                                                                                                                                               |       |
| Funding                  | 22  | Give the source of funding and the role of the funders for the present study and, if applicable, for the original study on which the present article is based                                                                                                                                                                                                                                                 | 1     |

\*Give information separately for cases and controls in case-control studies and, if applicable, for exposed and unexposed groups in cohort and cross-sectional studies.

**Note:** An Explanation and Elaboration article discusses each checklist item and gives methodological background and published examples of transparent reporting. The STROBE checklist is best used in conjunction with this article (freely available on the Web sites of PLoS Medicine at <http://www.plosmedicine.org/>, Annals of Internal Medicine at <http://www.annals.org/>, and Epidemiology at <http://www.epidem.com/>). Information on the STROBE Initiative is available at [www.strobe-statement.org](http://www.strobe-statement.org).



# BMJ Open

## Concurrent use of opioids and benzodiazepines/Z-drugs in Alberta, Canada and the risk of hospitalization and death: a case crossover study

|                                 |                                                                                                                                                                                                                                                                                                                                         |
|---------------------------------|-----------------------------------------------------------------------------------------------------------------------------------------------------------------------------------------------------------------------------------------------------------------------------------------------------------------------------------------|
| Journal:                        | <i>BMJ Open</i>                                                                                                                                                                                                                                                                                                                         |
| Manuscript ID                   | bmjopen-2020-038692.R2                                                                                                                                                                                                                                                                                                                  |
| Article Type:                   | Original research                                                                                                                                                                                                                                                                                                                       |
| Date Submitted by the Author:   | 05-Oct-2020                                                                                                                                                                                                                                                                                                                             |
| Complete List of Authors:       | Sharma, Vishal; University of Alberta, School of Public Health<br>Simpson, Scot H.; University of Alberta, Faculty of Pharmacy and Pharmaceutical Sciences<br>Samanani, Salim; Okaki Health Intelligence,<br>Jess, Ed; The College of Physicians & Surgeons of Alberta,<br>Eurich, Dean; University of Alberta, School of Public Health |
| <b>Primary Subject Heading</b>: | Epidemiology                                                                                                                                                                                                                                                                                                                            |
| Secondary Subject Heading:      | Public health, Research methods                                                                                                                                                                                                                                                                                                         |
| Keywords:                       | EPIDEMIOLOGY, PUBLIC HEALTH, Substance misuse < PSYCHIATRY, PAIN MANAGEMENT, Adverse events < THERAPEUTICS                                                                                                                                                                                                                              |
|                                 |                                                                                                                                                                                                                                                                                                                                         |

SCHOLARONE™  
Manuscripts



I, the Submitting Author has the right to grant and does grant on behalf of all authors of the Work (as defined in the below author licence), an exclusive licence and/or a non-exclusive licence for contributions from authors who are: i) UK Crown employees; ii) where BMJ has agreed a CC-BY licence shall apply, and/or iii) in accordance with the terms applicable for US Federal Government officers or employees acting as part of their official duties; on a worldwide, perpetual, irrevocable, royalty-free basis to BMJ Publishing Group Ltd ("BMJ") its licensees and where the relevant Journal is co-owned by BMJ to the co-owners of the Journal, to publish the Work in this journal and any other BMJ products and to exploit all rights, as set out in our [licence](#).

The Submitting Author accepts and understands that any supply made under these terms is made by BMJ to the Submitting Author unless you are acting as an employee on behalf of your employer or a postgraduate student of an affiliated institution which is paying any applicable article publishing charge ("APC") for Open Access articles. Where the Submitting Author wishes to make the Work available on an Open Access basis (and intends to pay the relevant APC), the terms of reuse of such Open Access shall be governed by a Creative Commons licence – details of these licences and which [Creative Commons](#) licence will apply to this Work are set out in our licence referred to above.

Other than as permitted in any relevant BMJ Author's Self Archiving Policies, I confirm this Work has not been accepted for publication elsewhere, is not being considered for publication elsewhere and does not duplicate material already published. I confirm all authors consent to publication of this Work and authorise the granting of this licence.

# Concurrent use of opioids and benzodiazepines/Z-drugs in Alberta, Canada and the risk of hospitalization and death: a case crossover study

Vishal Sharma (0000-0001-7907-1183), Scot H Simpson (0000-0002-9880-2129), Salim Samanani (0000-0001-6751-4805), Ed Jess, Dean Eurich (0000-0003-2197-0463)

## **Address for each author**

2-040 Li Ka Shing Center for Health Research Innovation, School of Public Health, University of Alberta, Edmonton, Alberta, Canada, T6G 2E1 Vishal Sharma BPharm PhD Candidate,

Faculty of Pharmacy and Pharmaceutical Sciences, University of Alberta, Edmonton, Alberta, Canada, T6G 2E1 Scot Simpson professor,

OKAKI Health intelligence, Calgary, Alberta, Canada Salim Samanani CEO and Medical Director OKAKI,

The College of Physicians & Surgeons of Alberta, Edmonton, Alberta, Canada, T5J 0N3 Ed Jess Director of Prescribing & Analytics,

2-040 Li Ka Shing Center for Health Research Innovation, School of Public Health, University of Alberta, Edmonton, Alberta, Canada, T6G 2E1 Dean Eurich professor

## **Corresponding Author:**

Dean Eurich, 2-040 Li Ka Shing Center for Health Research Innovation, University of Alberta, Edmonton, Alberta, Canada, T6G 2E1; Phone 780-492-6333; fax 780-492-7455; email: [deurich@ualberta.ca](mailto:deurich@ualberta.ca)

## **Acknowledgement**

This study is based on data provided by The Alberta Strategy for Patient Orientated Research (ABSPOR) SUPPORT unit and Alberta Health. The interpretation and conclusions contained herein are those of the researchers and do not necessarily represent the views of the Government of Alberta, ABSPOR or the College of Physicians & Surgeons of Alberta (CPSA). Neither the Government of Alberta, ABSPOR, Alberta Health nor the CPSA expresses any opinion in relation to this study. This work was supported by Mitacs through the Mitacs Accelerate Program and the College of Physicians & Surgeons of Alberta.

1  
2  
3  
4  
5  
6  
7  
8  
9  
10  
11  
12  
13  
14  
15  
16  
17  
18  
19  
20  
21  
22  
23  
24  
25  
26  
27  
28  
29  
30  
31  
32  
33  
34  
35  
36  
37  
38  
39  
40  
41  
42  
43  
44  
45  
46  
47  
48  
49  
50  
51  
52  
53  
54  
55  
56  
57  
58  
59  
60

For peer review only

1  
2  
3 **Contributors:** VS DE SHS SS and EJ were involved in the conception and design of the study.  
4 VS SHS and DE analyzed the data. VS and DE drafted the article. EJ SHS and SS revised the  
5 article. All authors gave final approval of the version to be published. The corresponding author  
6 attests that all listed authors meet authorship criteria and that no others meeting the criteria have  
7 been omitted. DE is the guarantor.  
8  
9

10 **Funding:** This study received no funding.  
11

12 **Copyright/license for publication:** *The Corresponding Author has the right to grant on behalf*  
13 *of all authors and does grant on behalf of all authors, a worldwide licence to the Publishers and*  
14 *its licensees in perpetuity, in all forms, formats and media (whether known now or created in the*  
15 *future), to i) publish, reproduce, distribute, display and store the Contribution, ii) translate the*  
16 *Contribution into other languages, create adaptations, reprints, include within collections and*  
17 *create summaries, extracts and/or, abstracts of the Contribution, iii) create any other derivative*  
18 *work(s) based on the Contribution, iv) to exploit all subsidiary rights in the Contribution, v) the*  
19 *inclusion of electronic links from the Contribution to third party material where-ever it may be*  
20 *located; and, vi) licence any third party to do any or all of the above.*  
21  
22  
23

24 **Competing Interest:** *All authors have completed the ICMJE uniform disclosure form at*  
25 *www.icmje.org/coi\_disclosure.pdf and declare: no support from any organisation for the*  
26 *submitted work; Salim Samanani has received research grants from the College of*  
27 *Physicians & Surgeons of Alberta; no other relationships or activities that could appear*  
28 *to have influenced the submitted work.*  
29  
30  
31  
32  
33

34 **Ethical approval:** This study was approved by the Health Research Ethics board at the  
35 University of Alberta (#Pro00083807).  
36

37 **Data Sharing:** The data used in this study is not available for external analysis. However,  
38 administrative health data can be accessed from Alberta Health by following defined research  
39 protocols and confidentiality agreements.  
40

41 **Transparency:** The lead author (the manuscript's guarantor, Dean Eurich) affirms that the  
42 manuscript is an honest, accurate, and transparent account of the study being reported; that no  
43 important aspects of the study have been omitted; and that any discrepancies from the study as  
44 originally planned (and, if relevant, registered) have been explained.  
45  
46

47 **Word Count: 2589**  
48  
49  
50  
51  
52  
53  
54  
55  
56  
57

## Abstract

**Objectives:** Co-prescribing of benzodiazepines/Z-drugs (BZDs) and opioids is a drug-use pattern of considerable concern due to risk of adverse events. The objective of this study is to estimate the effect of concurrent use of BZDs on the risk of hospitalizations/emergency department (ED) visits and deaths among opioid users.

**Design, Setting and Participants:** We conducted a population-based case crossover study during 2016-2018 involving Albertans 18 years of age and over who received opioids. From this group, we identified 1,056,773 people who were hospitalized or visited the ED, and 31,998 who died.

**Intervention:** Concurrent use of opioids and BZDs.

**Outcomes:** We estimated the risk of incident all-cause hospitalization/ED visits and all-cause mortality associated with concurrent BZD use by applying a matched-pair analyses comparing concurrent use to opioid only use.

**Results:** Concurrent BZD use occurred in 17% of opioid users (179,805/1,056,773). Overall, concurrent use was associated with higher risk of hospitalization/ED visit (OR 1.13,  $P<0.001$ ) and all cause death (OR 1.90;  $P<0.001$ ). The estimated risk of hospitalization/ED visit was highest in those  $>65$  (OR 1.5;  $P<0.001$ ), using multiple health providers (OR 1.67;  $P<0.001$ ) and  $>365$  days of opioid use (OR 1.76;  $P<0.001$ ). Events due to opioid toxicity were also associated with concurrent use (OR 1.8;  $P<0.001$ ). Opioid dose-response effects among concurrent patients who died were also noted (OR 3.13;  $P<0.001$ ).

**Interpretation:** Concurrent use of opioids and BZDs further contributes to the risk of hospitalization/ED visits and mortality in Alberta, Canada over opioid use alone, with higher opioid doses, older age and increased number of unique health providers carrying higher risks.

1  
2  
3 Regulatory bodies and health providers should reinforce safe drug-use practices and be vigilant  
4  
5 about co-prescribing.  
6  
7  
8  
9

### 10 **Strengths and Limitations**

- 11 • The use of a large population-based sample with near complete capture of all opioid and  
12 benzodiazepine dispensations from community pharmacies in Alberta.
- 13 • The case crossover methodology is a good fit for studies in pharmacoepidemiology like  
14 ours since the effect of many confounders can be substantially controlled,
- 15 • We considered patient sub-groups that have not previously been studied with respect to  
16 concurrent use of opioids and benzodiazepines.
- 17 • We assumed that patients took their medications as prescribed and recorded in the  
18 administrative data set.
- 19 • There is always residual confounding and importantly, unknown factors which may have  
20 changed between the control and case windows could have affected our results.  
21  
22  
23  
24  
25  
26  
27  
28  
29  
30  
31  
32  
33  
34  
35  
36  
37  
38  
39  
40  
41  
42  
43  
44  
45  
46  
47  
48  
49  
50  
51  
52  
53  
54  
55  
56  
57  
58  
59  
60

## Introduction

In the context of the opioid crisis, concurrent use of opioids and BZDs represents a drug use pattern that is of substantial concern because of the increased risk of mortality<sup>1-3</sup>. In Canada and the United States, the policy response to the opioid crisis has focused on establishing guidelines for safe and appropriate prescribing of opioids<sup>1,4</sup>. Although there are no specific clinical guidelines on indications for concurrent use of opioids and BZDs, there are numerous evidence based recommendations warning against concurrent prescribing of these medications<sup>1,4,5</sup> and previous literature suggests that opioids and BZDs cannot be targeted by safe use policies in isolation<sup>6</sup>. Despite these warnings, opioids and BZDs are still being co-prescribed at alarming rates, as shown in our previous work using Alberta data<sup>7</sup>. Data from the US also show an increasing trend in co-prescribing of opioids and BZDs<sup>2,8,9</sup> and 50% of opioid related deaths in Ontario and Manitoba, Canada involved BZDs<sup>10,11</sup>. Furthermore, 2 large studies in the US showed that concurrent use of opioids and BZDs carried a higher risk of hospital admission and mortality than opioid use alone<sup>2,3</sup>. However, the Canadian studies did not quantify the risk associated with concurrent use and the two US studies used populations limited to US military veterans and those that were privately insured which may not be generalizable to the Canadian population.

To our knowledge, no Canadian population-based studies have quantified the effect of concurrent BZD and opioid use on outcomes such as hospitalizations and mortality using the characteristics that we and others have identified as relevant<sup>2,3,7</sup>. A knowledge gap exists on the risks of co-prescribing of these agents, especially when looking at opioid dose, duration of concurrent use, and health care utilization. Using a case crossover study design, we aimed to



1  
2  
3 examine the association between concurrent use of opioids and BZDs and adverse health  
4  
5 outcomes and hypothesized that concurrent use would further increase risk of these outcomes.  
6  
7 Our results will help fill the evidence gap on the adverse outcomes associated with concurrent  
8  
9 prescribing of opioids and BZDs.  
10

## 11 **Methods**

### 12 **Data Sources**

13  
14  
15 Demographic information and dispensation records from community pharmacies were obtained  
16  
17 from Alberta Netcare Pharmaceutical Information Network (PIN). Information on  
18  
19 hospitalizations and ED visits was collected using the Canadian Institute for Health  
20  
21 Information's Discharge Abstract Database and National Ambulatory Care Reporting System.  
22  
23 Physician visits/claims and death records were provided by Alberta Health and Population and  
24  
25 Vital Statistics, respectively. Using anonymized patient level identifiers, these databases were  
26  
27 linked together to establish a complete description of drug exposures and health outcomes. This  
28  
29 study was approved by the health ethics research board at the University of Alberta  
30  
31 (#Pro00083807).  
32  
33  
34  
35  
36  
37

### 38 **Identification of Patients and Outcomes**

39  
40 Two distinct analysis cohorts were generated corresponding to two different study periods. For  
41  
42 the hospitalization and emergency department (ED) analyses, all subjects in Alberta, Canada  
43  
44 who received a dispensation for an opioid between Jan 1, 2016 and Dec 31, 2018, 18 years of  
45  
46 age and over were included. For mortality analyses, all subjects who received a dispensation for  
47  
48 an opioid between Jan 1, 2016 to Dec 31, 2017 were included. This distinction was required as  
49  
50 mortality data was not yet available for 2018 as reporting is 12-24 months delayed in the  
51  
52 province.  
53  
54  
55  
56  
57

1  
2  
3 Our primary outcomes among the cohort of opioid users were all cause, incident  
4 hospitalizations or ED visits during Jan 1, 2016-Dec 31, 2018 (n=1,056,773) and all cause  
5 mortality during Jan 1, 2016 - Dec 31, 2017 (n=31,998). The secondary outcome was incident  
6 hospitalization or ED visit due to ICD-10 diagnoses related to opioid toxicity (ICD10 F04-F99,  
7 T400-T404, T406) between Jan 1, 2016 and Dec 31, 2018 as this endpoint maybe more specific  
8 to the population using BZD and opioids<sup>12</sup>. The date of the event served as the index date for all  
9 analyses (eFigure 1).  
10  
11  
12  
13  
14  
15  
16  
17  
18  
19  
20

## 21 **Exposure**

22  
23 The exposure of interest was whether an opioid patient also used a BZD concurrently during the  
24 two study periods. We considered “use” as any day on which a patient had a supply of  
25 medication on hand on the basis of the date and days’ supply of each dispensation as others have  
26  
27  
28  
29  
30  
31  
32  
33  
34  
35  
36  
37  
38  
39  
40  
41  
42  
43  
44  
45  
46  
47  
48  
49  
50  
51  
52  
53  
54  
55  
56  
57  
58  
59  
60  
2. As described in our previous work<sup>7</sup>, for each patient, a day was categorized as concurrent if it  
was covered by both an opioid and BZD. For every patient in our two previously defined opioid  
cohorts and study periods, each day of follow up was categorized into one of four mutually  
exclusive groups of exposures: **1)** neither opioid nor BZD use (none), **2)** opioid only use, **3)** BZD  
only use and **4)** any concurrent use of opioid and BZD (concurrent). In our case crossover  
analyses, “none”, “opioid only”, “BZD only” and “concurrent” refer to drug use during the case  
crossover study windows. We identified opioid and BZD prescriptions using Anatomical  
Therapeutic Chemical codes<sup>13</sup> (eTable 1) and included all Health Canada approved<sup>14</sup> opioid and  
benzodiazepine/Z-drug formulations which are monitored in the Alberta Triplicate Prescription  
Program<sup>15</sup>.

## 53 **Design and Statistical Analyses**

1  
2  
3 An opioid user was defined as anyone who received at least 1 dispensation for an opioid and  
4  
5 concurrent use was defined as at least 1 day of overlap between an opioid and BZD. Health care  
6  
7 utilization<sup>16</sup> was defined by number of unique providers visited and number of opioid  
8  
9 prescriptions dispensed. Opioid doses were standardized into oral morphine equivalents (OME)  
10  
11 using conversion factors outlined by the Triplicate Prescription Program<sup>17</sup> in Alberta, Canada.  
12  
13

14  
15 We first conducted a descriptive analysis of our study population and performed pairwise  
16  
17 comparisons between “opioid only users” and “concurrent users” using t-tests and chi<sup>2</sup> tests of  
18  
19 independence using data from 2016-2018 (eFigure 1). Then, we used the case-crossover design  
20  
21 to estimate if concurrent use increased the risk of our defined outcomes. In a case crossover  
22  
23 study, each person serves as their own control; consequently, eliminating confounding due to  
24  
25 age, sex and other fixed patient factors<sup>18</sup>. This methodology is increasingly being utilized to  
26  
27 evaluate exposures encountered in pharmacoepidemiology and when using administrative  
28  
29 databases<sup>18-20</sup>.  
30  
31  
32

33  
34 Conditional logistic regression was used to contrast the four defined exposure categories  
35  
36 in the seven-day risk period immediately before the event with the seven-day control period one  
37  
38 month earlier. We chose the one month time period based on other published  
39  
40 pharmacoepidemiology studies using this methodology<sup>21</sup>. For each of the defined exposure  
41  
42 groups, we estimated the risk of incident hospitalization/ED visits and mortality using odds ratios  
43  
44 and their associated 95 percent confidence intervals. The opioid only exposure group was used  
45  
46 as the reference group in order to estimate the risk of concurrent use relative to opioid only use.  
47  
48 The analyses were stratified into the following sub-groups using data within the year prior to the  
49  
50 outcome (eFigure 1): sex, age at admission or death, total days of cumulative concurrency prior  
51  
52 to event, total days of previous opioid use, health care utilization, opioid molecule and dose  
53  
54 (OME). All analyses were performed using STATA/MP 15.1 (StataCorp., College Station, TX)  
55  
56  
57  
58  
59  
60

## Sensitivity Analyses

We performed the primary analyses on a subset of the population that excluded cancer and palliative patients like others have<sup>3,22</sup> by removing all patients that had relevant ICD codes (ICD9: 140-239, V66.7; ICD10: C00-D49, Z51) at any time between 2012-2018 identified from the above-mentioned databases. We also performed the analyses after adjusting the length of both the risk and control periods to 3 and 10 days and adding a second control period that preceded the event by 2 weeks.

## Patient and Public Involvement

This research was done without patient involvement. Patients were not invited to comment on the study design and were not consulted to develop patient relevant outcomes or interpret the results. Patients were not invited to contribute to the writing or editing of this document for readability or accuracy. There are no plans to disseminate the results of the research to study participants.

## Results

There were 1,056,773 patients in Alberta classified as opioid users who were hospitalized or visited the ED during 2016-2018 (Table 1). Among this cohort, 17% (n=179,805) had at least one day of concurrent use with a BZD during follow-up. Similarly, there were 31,998 patients in the death cohort and 34.5% (n=11,055) had at least one day of concurrent use.

## Hospitalizations or ED visits

Compared to opioid only use, concurrent use of opioids and BZDs was associated with an elevated risk of hospitalization or ED visit ((prevalence of exposure to concurrent use in control and case windows, respectively: 2.1% vs. 3.3%); OR 1.13; P<0.001; Table 2). After stratification, those over 65 years of age (3.6% vs. 4.8%; OR 1.5; P<0.001) and those visiting >5

1  
2  
3 health providers (13.0% vs. 16.5%; OR 1.67;  $P<0.001$ ) had the highest risk associated with  
4 concurrent use. With respect to total days of concurrency prior to the event, although any  
5 duration of concurrency was associated with an increase in risk, one of the highest risks was  
6 observed in those that had concurrent use of less than a month (1-30 days) (1.4% vs. 5.8%; OR  
7 2.47;  $P<0.001$ ; Table 2). Not unexpected, increasing duration of previous use of opioids was  
8 also associated with an increasing estimated risk (Table 2).

9  
10  
11  
12  
13  
14  
15  
16  
17 Among the concurrent patients who were hospitalized or visited an ED, morphine,  
18 oxycodone, hydromorphone and tramadol carried the highest risks when compared to codeine  
19 and used concurrently with BZDs (Figure 1). As expected, there was an opioid dose response  
20 effect on estimated risk where higher OME's had higher risk compared to  $<50$  OME among  
21 concurrent patients (Figure 1). When specific opioid molecules and OME dose ranges were  
22 examined, an increased risk of hospitalization or ED visit was noted for all opioid molecules and  
23 doses when used concurrently with a BZD (Figure 2).

24  
25  
26  
27  
28  
29  
30  
31  
32  
33 In the secondary analysis, the estimated risk of hospitalization or ED visit was also higher  
34 in concurrent patients when compared to opioid only patients for admissions related to opioid  
35 toxicity (OR 1.8;  $P<0.001$ ).

### 36 37 38 39 40 **Mortality**

41  
42 We identified 31,998 deaths between 2016-2017 in our cohort of opioid users. Estimated  
43 risk of death was substantially higher with concurrent use when compared to opioid only use  
44 when comparing the control and case windows (12.7% vs. 18.6%; OR 1.90;  $P<0.001$ ) with males  
45 having a higher risk than females (Table 3). Among concurrent patients, there was an opioid  
46 dose response effect on estimated risk of death with  $>90$  OME associated with up to triple the  
47 risk when compared to  $<50$  OME group (Table 4). Similar to the trends in hospitalizations or  
48  
49  
50  
51  
52  
53  
54  
55  
56  
57  
58  
59  
60

1  
2  
3 ED visits, there was an elevated estimated risk of death (12.1% vs. 49.1%; OR 4.93; P<0.001)  
4  
5 during the first 30 days of cumulative concurrent use (Table 3)  
6

7  
8 In sensitivity analyses, concurrent use was still associated with a higher risk of  
9  
10 hospitalization or ED visits and mortality when compared to opioid only use after adjusting the  
11  
12 length of study windows, number of control windows, and when cancer and palliative patients  
13  
14 were excluded.  
15

## 16 17 **Discussion**

18  
19 Many clinical resources warn that BZDs should not be combined with opioids<sup>1,4,5</sup>, yet our study  
20  
21 showed a substantial proportion of patients using an opioid did so in combination with a BZD in  
22  
23 Alberta, Canada. A concerning trend in adverse outcomes was observed with a near two-fold  
24  
25 increased risk of mortality associated with concurrent BZD and opioid use compared to opioid  
26  
27 only use. In particular, those age >65 years, those visiting multiple health providers, and higher  
28  
29 OME's were at highest relative risks. Importantly, the data also show that one of the highest risks  
30  
31 was observed in those that had concurrent use of less than a month with a near 2.5-fold relative  
32  
33 increase in hospitalizations or ED visits. Although perceived to be safer, tramadol concurrently  
34  
35 used with BZDs had a substantially higher risk than codeine, especially among females.  
36  
37

38  
39  
40 Our findings are consistent with two large studies done in the United States. Sun et al.<sup>2</sup>  
41  
42 reported that 17% of opioid patients concurrently used a BZD and that higher durations of opioid  
43  
44 use also carried higher risks of hospitalization or ED visit with respect to concurrent users,  
45  
46 findings that we also shared. However, compared to Sun et al, our overall cohort risk was lower  
47  
48 (OR 2.14 vs 1.13). This could be due to differences in study population and methodology; the  
49  
50 Sun study included privately insured patients and used a retrospective analysis whereas we  
51  
52 included all Albertans regardless of coverage and used a case-crossover design. The other study,  
53  
54  
55  
56  
57

1  
2  
3 done by Park et al., estimated risk of death among US veterans exposed to concurrent use of  
4  
5 opioids and BZDs<sup>3</sup>. Although both of our studies associated concurrent use of opioids and  
6  
7 BZDs with increased risk of death, overall and in an opioid-dose dependent manner, the Park et  
8  
9 al risk estimates were much higher than ours, almost double. Of note, however, Park et al  
10  
11 included only veterans, which proportionally represented an older population than ours. When  
12  
13 our death analysis was stratified by age, our risk of death estimates were very similar to the Park  
14  
15 et al study. Furthermore, compared with the general population, veterans in the US have a  
16  
17 higher prevalence of substance use disorders and mental illness, which carry their own risks<sup>23-25</sup>.  
18  
19 As other studies have observed, the estimated risk of an opioid-related death from taking 50-90  
20  
21 OME was double when compared to lower OME doses<sup>22</sup>. Estimates from our analyses indicate  
22  
23 that this risk could increase by a factor of 2-3x from the addition of a BZD, depending on the age  
24  
25 of the patient. Indeed, our findings showed that adding a BZD to any opioid molecule and to any  
26  
27 opioid dose multiplied the risk of hospitalization or ED visit or death.  
28  
29  
30  
31  
32

33 Our finding that hospitalization or ED visit and mortality risks were higher during the  
34  
35 initial periods of concurrent use are also similar to another study done in the US<sup>26</sup>. Both of our  
36  
37 estimates associate a higher risk during the first few days of concurrent use as more susceptible  
38  
39 patients may experience adverse outcomes earlier in concurrent use, thus signaling that even  
40  
41 short periods of concurrent use carry risks.  
42  
43

44 The strengths of our study include the large population-based sample with near complete  
45  
46 capture of all opioid and BZD dispensations from community pharmacies using PIN. As well,  
47  
48 hospitalizations and ED visits, and mortality from Alberta Health and Vital Statistics were also  
49  
50 used to identify our outcomes. Since we used a case crossover design, many confounding  
51  
52 variables would have been completely controlled for in our analysis (e.g. age, sex, co-  
53  
54 morbidities) relative to that of other studies conducted to date, however, there could be residual  
55  
56  
57  
58  
59  
60

1  
2  
3 confounding and bias due to the fact that opioid only users could be different than concurrent  
4 users in characteristics which our data may not adequately capture. Importantly, other unknown  
5 factors which may have changed between the control and case windows could have affected our  
6 results. Another limitation is that we are assuming that patients took their medications as  
7 prescribed. Medication adherence in opioid users is a challenging issue <sup>27</sup>.

8  
9  
10  
11  
12  
13  
14 Despite the messages from safe opioid prescribing guidelines<sup>1,4</sup>, our findings show that  
15 Alberta, Canada still experiences troubling trends and risks associated with concurrent use of  
16 opioids and BZDs. Although total prescribed OME's have declined across Canada during the  
17 past few years <sup>28</sup>, the trend with concurrent use of opioids and BZDs is unknown and may in fact  
18 be increasing <sup>2,8</sup>. From a clinical perspective, prescribers should closely follow opioid use  
19 guidelines and avoid concurrent prescribing with BZDs in most clinical scenarios <sup>1,4</sup>. There is an  
20 opportunity for providers to monitor and potentially avoid concurrent use altogether or reassess  
21 for dose tapering. Future research should focus on why health providers and patients continue to  
22 accept and rely on concurrent prescribing of these agents as a form of treatment. Policy makers  
23 and professional regulatory bodies should reinforce safe opioid use prescribing guidelines and  
24 educate providers about the additional risks associated with concurrent use of opioids and BZDs.

#### 41 42 **List of Figures:**

43  
44  
45 Figure 1. Risk of all cause hospitalization or emergency department visits among concurrent  
46 users of opioids and benzodiazepines by molecule and opioid dose using codeine and <50 OME  
47 as reference groups.

48  
49  
50 Figure 2. Risk of hospitalization or emergency department visit comparing specific opioid  
51 molecules and opioid doses used concurrently with BZDs~ to their respective monotherapy  
52 counterparts



**Table 1. Characteristics and summary statistics of opioid users with incident hospitalizations/emergency department visits using data from 2016-2018.**

| Characteristic                               | Total No. (%) of patients~<br>n=1,056,773* | No. (%) of concurrent users~<br>n=179,805@ | No. (%) of non-concurrent opioid users~<br>n=876,968§ |
|----------------------------------------------|--------------------------------------------|--------------------------------------------|-------------------------------------------------------|
| <b>opioid users</b>                          | 1,056,773 (100)                            | 179,805 (100)                              | 876,968 (100)                                         |
| <b>Number of dispensations for opioids</b>   | 11,240,195(--)                             | 5,855,666 (--)                             | 5,384,529 (--)                                        |
| <b>Number of dispensations for BZRA's</b>    | 6,050,709(--)                              | 4,767,945 (--)                             | 1,282,764 (--)**                                      |
| <b>Sex:</b>                                  |                                            |                                            |                                                       |
| <b>Female</b>                                | 581,457 (55)                               | 109,128 (60.7)                             | 472,411 (53.9)                                        |
| <b>Male</b>                                  | 475,316 (45)                               | 70,677 (39.3)                              | 404,557 (46.1)                                        |
| <b>Age at admission, year,</b>               |                                            |                                            |                                                       |
| <b>median (IQR)</b>                          | 49 (34-62)                                 | 56 (43-67)                                 | 47 (32-61)                                            |
| <b>Mean (SD)</b>                             | 48.7 (18.1)                                | 55.2 (17.0)                                | 47.4 (18.1)                                           |
| <b>10-20</b>                                 | 48,721 (4.6)                               | 2,276 (1.3)                                | 46,445 (5.3)                                          |
| <b>21-40</b>                                 | 339,380 (32.1)                             | 36,192 (20.1)                              | 303,188 (34.5)                                        |
| <b>41-65</b>                                 | 464,720 (44.0)                             | 90,626 (50.4)                              | 374,094 (42.7)                                        |
| <b>&gt;65</b>                                | 203,909 (19.3)                             | 50,708 (28.2)                              | 153,201 (17.5)                                        |
| <b>Number of unique prescribers visited,</b> |                                            |                                            |                                                       |
| <b>median (IQR)</b>                          | 2 (1-3)                                    | 4 (2-6)                                    | 1 (1-2)                                               |
| <b>Mean (SD)</b>                             | 2.3 (2.2)                                  | 4.5 (3.4)                                  | 1.9 (1.4)                                             |
| <b>1</b>                                     | 508,745 (48.1)                             | 19,252 (10.7)                              | 489,493 (55.8)                                        |
| <b>2</b>                                     | 246,935 (23.4)                             | 33,594 (18.7)                              | 213,341 (24.3)                                        |
| <b>3</b>                                     | 124,773 (11.8)                             | 33,473 (18.6)                              | 91,300 (10.4)                                         |
| <b>4</b>                                     | 66,825 (6.3)                               | 26,573 (14.8)                              | 40,252 (4.6)                                          |
| <b>&gt;5</b>                                 | 109,495 (10.4)                             | 66,913 (37.2)                              | 42,582 (4.9)                                          |
| <b>Number of unique pharmacies visited,</b>  |                                            |                                            |                                                       |
| <b>median (IQR)</b>                          | 2 (1-3)                                    | 3 (2-5)                                    | 2 (1-2)                                               |
| <b>Mean (SD)</b>                             | 2.37 (2.18)                                | 4.1 (3.8)                                  | 2.02 (1.45)                                           |
| <b>1</b>                                     | 431,651 (40.8)                             | 29,486 (16.4)                              | 402,165 (45.8)                                        |
| <b>2</b>                                     | 301,730 (28.5)                             | 41,064 (22.8)                              | 260,666 (29.7)                                        |
| <b>3</b>                                     | 151,297 (14.3)                             | 33,578 (18.8)                              | 117,710 (13.4)                                        |
| <b>4</b>                                     | 73,698 (7.0)                               | 23,356 (13.0)                              | 50,342 (5.7)                                          |
| <b>&gt;5</b>                                 | 98,406 (9.3)                               | 52,321 (29.1)                              | 46,085 (5.3)                                          |
| <b>Total number of opioid prescriptions</b>  |                                            |                                            |                                                       |
| <b>dispensed,</b>                            |                                            |                                            |                                                       |
| <b>median (IQR)</b>                          | 2 (1-4)                                    | 8 (2-29)                                   | 1 (1-3)                                               |
| <b>Mean (SD)</b>                             | 9.8 (51.4)                                 | 32.6 (101.5)                               | 5.2 (30.9)                                            |
| <b>1-10</b>                                  | 919,059 (87.0)                             | 100,809 (56.0)                             | 818,250 (93.3)                                        |
| <b>11-20</b>                                 | 48,371 (4.6)                               | 22,796 (12.7)                              | 25,575 (2.9)                                          |
| <b>20-30</b>                                 | 23,706 (2.2)                               | 13,163 (7.3)                               | 10,543 (1.2)                                          |
| <b>&gt;31</b>                                | 65,637 (6.2)                               | 43,037 (23.9)                              | 22,600 (2.6)                                          |
| <b>Total cumulative days of opioid use,</b>  |                                            |                                            |                                                       |
| <b>Median (IQR)</b>                          | 11 (5-39)                                  | 104 (21-522)                               | 9 (5-23)                                              |
| <b>mean (SD)</b>                             | 94.5 (224)                                 | 297.9 (358.0)                              | 52.8 (154.7)                                          |
| <b>1-30</b>                                  | 744,607 (70.5)                             | 54,670 (30.4)                              | 689,937 (78.7)                                        |
| <b>31-60</b>                                 | 94,659 (9.0)                               | 20,406 (11.4)                              | 74,253 (8.5)                                          |
| <b>61-90</b>                                 | 35,536 (3.4)                               | 10,934 (6.1)                               | 24,602 (2.8)                                          |
| <b>&gt;90</b>                                | 181,971 (17.2)                             | 93,795 (52.2)                              | 88,176 (10.1)                                         |

**Table 1. Characteristics of opioid users with incident hospitalizations/emergency department visits in the period 2016-2018 (continued)**

|                                                                                                                                                                                                                                                                                                                                                                                                                                                                                                                                                                                                                                                |                |                |                |
|------------------------------------------------------------------------------------------------------------------------------------------------------------------------------------------------------------------------------------------------------------------------------------------------------------------------------------------------------------------------------------------------------------------------------------------------------------------------------------------------------------------------------------------------------------------------------------------------------------------------------------------------|----------------|----------------|----------------|
| Number of people that received a dispensation for specified opioid molecule and daily OME#:                                                                                                                                                                                                                                                                                                                                                                                                                                                                                                                                                    |                |                |                |
| <b>buprenorphine/naloxone</b>                                                                                                                                                                                                                                                                                                                                                                                                                                                                                                                                                                                                                  |                |                |                |
| <b>methadone</b>                                                                                                                                                                                                                                                                                                                                                                                                                                                                                                                                                                                                                               | 7,995 (0.76)   | 3,005 (1.7)    | 7,451 (0.85)   |
| <b>buprenorphine (transdermal patch)</b>                                                                                                                                                                                                                                                                                                                                                                                                                                                                                                                                                                                                       | 7,394 (0.70)   | 3,218 (1.8)    | 7,043 (0.80)   |
| <b>codeine</b>                                                                                                                                                                                                                                                                                                                                                                                                                                                                                                                                                                                                                                 | 8,238 (0.78)   | 3,447 (1.9)    | 7,158 (0.82)   |
| <b>morphine</b>                                                                                                                                                                                                                                                                                                                                                                                                                                                                                                                                                                                                                                | 738,601 (69.9) | 120,514 (67.0) | 701,243 (80.0) |
| <b>oxycodone</b>                                                                                                                                                                                                                                                                                                                                                                                                                                                                                                                                                                                                                               | 29,796 (2.8)   | 12,069 (6.7)   | 25,828 (3.0)   |
| <b>oxycodone/naloxone</b>                                                                                                                                                                                                                                                                                                                                                                                                                                                                                                                                                                                                                      | 119,289 (11.3) | 37,692 (21.0)  | 108,036 (12.3) |
| <b>hydromorphone</b>                                                                                                                                                                                                                                                                                                                                                                                                                                                                                                                                                                                                                           | 1,163 (0.11)   | 485 (0.27)     | 1,007 (0.12)   |
| <b>fentanyl</b>                                                                                                                                                                                                                                                                                                                                                                                                                                                                                                                                                                                                                                | 70,181 (6.6)   | 22,376 (12.4)  | 62,205 (7.1)   |
| <b>tramadol</b>                                                                                                                                                                                                                                                                                                                                                                                                                                                                                                                                                                                                                                | 8,888 (0.84)   | 6,279 (3.5)    | 8,067 (0.92)   |
| <b>tapentadol</b>                                                                                                                                                                                                                                                                                                                                                                                                                                                                                                                                                                                                                              | 316,662 (30.0) | 50,891 (28.3)  | 292,965 (33.4) |
| <b>50 OME<sup>^</sup></b>                                                                                                                                                                                                                                                                                                                                                                                                                                                                                                                                                                                                                      | 1,570 (0.15)   | 696 (0.39)     | 1,387 (0.16)   |
| <b>50-90 OME<sup>^</sup></b>                                                                                                                                                                                                                                                                                                                                                                                                                                                                                                                                                                                                                   | 854,759 (86.3) | 154,742 (90.3) | 812,574 (99.2) |
| <b>&gt;90 OME<sup>^</sup></b>                                                                                                                                                                                                                                                                                                                                                                                                                                                                                                                                                                                                                  | 166,392 (16.8) | 48,642 (28.4)  | 144,629 (17.7) |
|                                                                                                                                                                                                                                                                                                                                                                                                                                                                                                                                                                                                                                                | 101,837 (10.3) | 40,265 (23.5)  | 86,620 (10.6)  |
| <b>Total days of cumulative concurrency among concurrent users</b>                                                                                                                                                                                                                                                                                                                                                                                                                                                                                                                                                                             |                |                |                |
| <b>1-30</b>                                                                                                                                                                                                                                                                                                                                                                                                                                                                                                                                                                                                                                    |                | 92,757 (51.6)  |                |
| <b>31-60</b>                                                                                                                                                                                                                                                                                                                                                                                                                                                                                                                                                                                                                                   |                | 17,327 (9.6)   |                |
| <b>61-90</b>                                                                                                                                                                                                                                                                                                                                                                                                                                                                                                                                                                                                                                   |                | 9,006 (5.0)    |                |
| <b>91-180</b>                                                                                                                                                                                                                                                                                                                                                                                                                                                                                                                                                                                                                                  | N/A            | 14,713 (8.2)   | N/A            |
| <b>181-270</b>                                                                                                                                                                                                                                                                                                                                                                                                                                                                                                                                                                                                                                 |                | 8,468 (4.7)    |                |
| <b>271-360</b>                                                                                                                                                                                                                                                                                                                                                                                                                                                                                                                                                                                                                                 |                | 6,270 (3.5)    |                |
| <b>&gt;361</b>                                                                                                                                                                                                                                                                                                                                                                                                                                                                                                                                                                                                                                 |                | 31,264 (17.4)  |                |
| <b>Elixhauser score<sup>**</sup>:</b>                                                                                                                                                                                                                                                                                                                                                                                                                                                                                                                                                                                                          |                |                |                |
| <b>Mean (SD)</b>                                                                                                                                                                                                                                                                                                                                                                                                                                                                                                                                                                                                                               | 2.86 (2.45)    | 4.36 (2.8)     | 2.56 (2.25)    |
| <b>Median (IQR)</b>                                                                                                                                                                                                                                                                                                                                                                                                                                                                                                                                                                                                                            | 2 (1-4)        | 4 (2-6)        | 2 (1-4)        |
| <p>*n=990,098 for OME analyses<br/>           @n=171,457 for OME analyses<br/>           §n=818,641 for OME analyses<br/>           ~unless otherwise indicated<br/>           # defined as having at least 1 day at specified dose or molecule<br/>           ^OME=oral morphine equivalents, buprenorphine and methadone dropped from OME analysis<br/>           **Determined using data from 2012-2016<br/>           ***If patients had BZD use outside of the study windows, then this was captured in our summary statistics.<br/>           Note: All pairwise comparisons between concurrent and opioid only users had p&lt;0.001</p> |                |                |                |

**Table 2. Risk of all cause hospitalization or emergency department visits in people using opioids and benzodiazepine receptor modulators during 2016-2018.**

| Patient Group                                | Analysis group based on exposure category* |           |                         |                                  |           |               |           |
|----------------------------------------------|--------------------------------------------|-----------|-------------------------|----------------------------------|-----------|---------------|-----------|
|                                              | None                                       |           | Opioid only (reference) | Benzodiazepine <sup>^</sup> only |           | Concurrent    |           |
|                                              | OR (p-value)                               | 95% CI    | OR                      | OR (p-value)                     | 95% CI    | OR (p-value)  | 95% CI    |
| <b>Overall population</b>                    | 0.21 (<0.001)                              | 0.20-0.21 | 1                       | 0.46 (<0.001)                    | 0.45-0.48 | 1.13 (<0.001) | 1.10-1.17 |
| <b>Sex:</b>                                  |                                            |           |                         |                                  |           |               |           |
| <b>Female</b>                                | 0.24 (<0.001)                              | 0.23-0.25 | 1                       | 0.51 (<0.001)                    | 0.49-0.52 | 1.19 (<0.001) | 1.14-1.23 |
| <b>Male</b>                                  | 0.18 (<0.001)                              | 0.18-0.19 | 1                       | 0.43 (<0.001)                    | 0.41-0.45 | 1.10 (<0.001) | 1.05-1.16 |
| <b>Age at admission:</b>                     |                                            |           |                         |                                  |           |               |           |
| <b>20-40</b>                                 | 0.16 (<0.001)                              | 0.15-0.16 | 1                       | 0.33 (<0.001)                    | 0.31-0.35 | 0.96 (0.33)   | 0.88-1.04 |
| <b>40-65</b>                                 | 0.23 (<0.001)                              | 0.22-0.23 | 1                       | 0.48 (<0.001)                    | 0.46-0.50 | 1.12 (<0.001) | 1.07-1.18 |
| <b>&gt;65</b>                                | 0.30 (<0.001)                              | 0.29-0.31 | 1                       | 0.73 (<0.001)                    | 0.69-0.77 | 1.50 (<0.001) | 1.39-1.61 |
| <b>Total days of cumulative concurrency:</b> |                                            |           |                         |                                  |           |               |           |
| <b>1-30</b>                                  | 0.33 (<0.001)                              | 0.31-0.35 | 1                       | 0.72 (<0.001)                    | 0.67-0.78 | 2.47 (<0.001) | 2.26-2.70 |
| <b>31-90</b>                                 | 0.45 (<0.001)                              | 0.41-0.49 | 1                       | 1.05 (0.36)                      | 0.95-1.17 | 1.50 (<0.001) | 1.34-1.67 |
| <b>91-180</b>                                | 0.44 (<0.001)                              | 0.39-0.49 | 1                       | 1.09 (0.24)                      | 0.95-1.24 | 1.45 (<0.001) | 1.28-1.64 |
| <b>181-365</b>                               | 0.42 (<0.001)                              | 0.37-0.48 | 1                       | 1.11 (<0.11)                     | 0.97-1.3  | 1.57 (<0.001) | 1.40-1.76 |
| <b>&gt;365</b>                               | 0.26 (<0.001)                              | 0.23-0.29 | 1                       | 1.26 (<0.001)                    | 1.11-1.41 | 1.82 (<0.001) | 1.67-1.99 |
| <b>&gt;900</b>                               | 0.13 (<0.001)                              | 0.09-0.21 | 1                       | 1.64 (0.01)                      | 1.12-2.38 | 3.15 (<0.001) | 2.41-4.11 |
| <b>Total days of opioid use:</b>             |                                            |           |                         |                                  |           |               |           |
| <b>1-7</b>                                   | 0.04 (<0.001)                              | 0.03-0.05 | 1                       | 0.08 (<0.001)                    | 0.07-0.09 | 0.90 (0.40)   | 0.72-1.14 |
| <b>8-30</b>                                  | 0.15 (<0.001)                              | 0.14-0.16 | 1                       | 0.30 (<0.001)                    | 0.28-0.32 | 1.21 (0.002)  | 1.07-1.38 |
| <b>31-90</b>                                 | 0.34 (<0.001)                              | 0.33-0.35 | 1                       | 0.71 (<0.001)                    | 0.66-0.76 | 1.36 (<0.001) | 1.22-1.51 |
| <b>91-180</b>                                | 0.48 (<0.001)                              | 0.46-0.51 | 1                       | 1.05 (0.35)                      | 0.95-1.15 | 1.54 (<0.001) | 1.37-1.73 |
| <b>181-365</b>                               | 0.54 (<0.001)                              | 0.52-0.57 | 1                       | 1.27 (<0.001)                    | 1.15-1.40 | 1.73 (<0.001) | 1.56-1.92 |
| <b>&gt;365</b>                               | 0.41 (<0.001)                              | 0.39-0.42 | 1                       | 1.21 (<0.001)                    | 1.12-1.32 | 1.76 (<0.001) | 1.66-1.86 |

**Table 2. Risk of all cause hospitalization or emergency department visits in people using opioids and benzodiazepine receptor modulators during 2016-2018 (continued)**

|                                        |               |           |   |  |               |           |               |           |
|----------------------------------------|---------------|-----------|---|--|---------------|-----------|---------------|-----------|
| <b>Number of opioid dispensations:</b> |               |           |   |  |               |           |               |           |
| <b>1-10</b>                            | 0.16 (<0.001) | 0.16-0.17 | 1 |  | 0.34 (<0.001) | 0.33-0.35 | 0.93 (0.01)   | 0.87-0.98 |
| <b>11-30</b>                           | 0.49 (<0.001) | 0.47-0.51 | 1 |  | 1.20 (<0.001) | 1.11-1.30 | 1.62 (<0.001) | 1.50-1.74 |
| <b>&gt;30</b>                          | 0.35 (<0.001) | 0.33-0.37 | 1 |  | 1.09 (0.10)   | 0.98-1.21 | 1.77 (<0.001) | 1.65-1.89 |
| <b>Number of unique prescribers:</b>   |               |           |   |  |               |           |               |           |
| <b>1</b>                               | 0.14 (<0.001) | 0.13-0.14 | 1 |  | 0.30 (<0.001) | 0.28-0.32 | 0.73 (<0.001) | 0.65-0.81 |
| <b>2</b>                               | 0.20 (<0.001) | 0.19-0.20 | 1 |  | 0.41 (<0.001) | 0.39-0.43 | 1.02 (0.64)   | 0.94-1.11 |
| <b>3</b>                               | 0.26 (<0.001) | 0.25-0.27 | 1 |  | 0.51 (<0.001) | 0.48-0.54 | 1.30 (<0.001) | 1.19-1.42 |
| <b>4</b>                               | 0.32 (<0.001) | 0.31-0.34 | 1 |  | 0.68 (<0.001) | 0.63-0.73 | 1.54 (<0.001) | 1.39-1.70 |
| <b>&gt;5</b>                           | 0.38 (<0.001) | 0.37-0.40 | 1 |  | 0.91 (<0.001) | 0.86-0.96 | 1.67 (<0.001) | 1.57-1.77 |
| <b>Number of unique pharmacies:</b>    |               |           |   |  |               |           |               |           |
| <b>1</b>                               | 0.14 (<0.001) | 0.13-0.15 | 1 |  | 0.32 (<0.001) | 0.31-0.35 | 0.95 (0.25)   | 0.86-1.04 |
| <b>2</b>                               | 0.20 (<0.001) | 0.19-0.21 | 1 |  | 0.45 (<0.001) | 0.43-0.48 | 1.12 (0.007)  | 1.03-1.21 |
| <b>3</b>                               | 0.27 (<0.001) | 0.26-0.28 | 1 |  | 0.56 (<0.001) | 0.52-0.59 | 1.24 (<0.001) | 1.14-1.35 |
| <b>4</b>                               | 0.31 (<0.001) | 0.29-0.33 | 1 |  | 0.66 (<0.001) | 0.61-0.71 | 1.47 (<0.001) | 1.33-1.64 |
| <b>&gt;5</b>                           | 0.39 (<0.001) | 0.38-0.41 | 1 |  | 0.78 (<0.001) | 0.73-0.83 | 1.47 (<0.001) | 1.38-1.57 |

**Note: CI = confidence interval, OR=odds ratio**

**\* Risk interval= seven days before hospitalization/emergency visit; control interval= seven-day period one month before hospitalization/emergency department visit**

**^includes all benzodiazepine receptor modulators**

Table 3. Risk of all cause death in 2016-2017 among opioid users and subgroups of patients. *N*=31,998

| Patient Category                             | Analysis group based on exposure category |           |                                  |                                  |           |               |           |  |
|----------------------------------------------|-------------------------------------------|-----------|----------------------------------|----------------------------------|-----------|---------------|-----------|--|
|                                              | None                                      |           | Opioid only<br>(reference group) | Benzodiazepine <sup>^</sup> only |           | Concurrent    |           |  |
|                                              | OR (p-value)                              | 95% CI    | OR (p-value)                     | OR (p-value)                     | 95% CI    | OR (p-value)  | 95% CI    |  |
| <b>Overall population</b>                    | 0.67 (<0.001)                             | 0.64-0.71 | 1                                | 0.76 (<0.001)                    | 0.69-0.83 | 1.90 (<0.001) | 1.76-2.05 |  |
| <b>Female</b>                                | 0.64 (<0.001)                             | 0.60-0.70 | 1                                | 0.68 (<0.001)                    | 0.60-0.78 | 1.73 (<0.001) | 1.56-1.92 |  |
| <b>Male</b>                                  | 0.70 (<0.001)                             | 0.62-0.76 | 1                                | 0.85 (0.02)                      | 0.75-0.97 | 2.09 (<0.001) | 1.87-2.33 |  |
| <b>Age at death:</b>                         |                                           |           |                                  |                                  |           |               |           |  |
| <b>18-45</b>                                 | 1.20 (0.13)                               | 0.94-1.54 | 1                                | 1.98 (<0.001)                    | 1.38-2.86 | 2.26 (<0.001) | 1.63-3.13 |  |
| <b>46-65</b>                                 | 1.13 (0.03)                               | 1.01-1.28 | 1                                | 1.24 (0.03)                      | 1.02-1.51 | 2.20 (<0.001) | 1.90-2.55 |  |
| <b>&gt;65</b>                                | 0.56 (<0.001)                             | 0.52-0.60 | 1                                | 0.61 (<0.001)                    | 0.54-0.68 | 1.79 (<0.001) | 1.63-1.97 |  |
| <b>Total days of cumulative concurrency:</b> |                                           |           |                                  |                                  |           |               |           |  |
| <b>1-30</b>                                  | 0.82 (0.007)                              | 0.71-0.95 | 1                                | 0.88 (0.17)                      | 0.74-1.05 | 4.93 (<0.001) | 4.29-5.66 |  |
| <b>31-90</b>                                 | 2.4 (<0.001)                              | 1.84-3.15 | 1                                | 1.18 (0.21)                      | 0.91-1.56 | 1.41 (<0.001) | 1.14-1.74 |  |
| <b>91-180</b>                                | 2.39 (<0.001)                             | 1.58-3.60 | 1                                | 1.74 (0.01)                      | 1.12-2.68 | 0.80 (0.20)   | 0.56-1.12 |  |
| <b>181-365</b>                               | 4.27 (<0.001)                             | 2.58-7.07 | 1                                | 1.54 (0.08)                      | 0.94-2.51 | 0.92 (0.66)   | 0.63-1.33 |  |
| <b>&gt;365</b>                               | 1.53 (0.26)                               | 0.73-3.24 | 1                                | 1.17 (0.71)                      | 0.51-2.72 | 0.39 (0.003)  | 0.21-0.72 |  |

Table 3. Risk of all cause death in 2016-2017 among opioid users and subgroups of patients. *N=31,998 (continued)*

|                                        |               |           |   |  |               |           |               |           |
|----------------------------------------|---------------|-----------|---|--|---------------|-----------|---------------|-----------|
| <b>Total days of opioid use:</b>       |               |           |   |  |               |           |               |           |
| <b>1-7</b>                             | 0.14 (<0.001) | 0.11-0.17 | 1 |  | 0.17 (<0.001) | 0.12-0.23 | 2.78 (<0.001) | 1.79-4.32 |
| <b>8-30</b>                            | 0.38 (<0.001) | 0.34-0.42 | 1 |  | 0.48 (<0.001) | 0.40-0.59 | 2.29 (<0.001) | 1.89-2.78 |
| <b>31-90</b>                           | 1.03 (0.56)   | 0.92-1.16 | 1 |  | 1.46 (<0.001) | 1.19-1.78 | 2.58 (<0.001) | 2.22-3.00 |
| <b>91-180</b>                          | 2.08 (<0.001) | 1.75-2.48 | 1 |  | 2.62 (<0.001) | 1.96-3.51 | 2.16 (<0.001) | 1.80-2.60 |
| <b>181-365</b>                         | 2.66 (<0.001) | 2.18-3.24 | 1 |  | 3.13 (<0.001) | 2.24-4.38 | 1.83 (<0.001) | 1.50-2.23 |
| <b>&gt;365</b>                         | 2.83 (<0.001) | 2.16-3.71 | 1 |  | 2.41 (<0.001) | 1.51-3.87 | 1.20 (0.15)   | 0.93-1.53 |
| <b>Number of opioid dispensations:</b> |               |           |   |  |               |           |               |           |
| <b>1-10</b>                            | 0.41 (<0.001) | 0.38-0.44 | 1 |  | 0.45 (<0.001) | 0.39-0.51 | 2.23 (<0.001) | 1.96-2.54 |
| <b>11-30</b>                           | 1.36 (<0.001) | 1.20-1.54 | 1 |  | 1.72 (<0.001) | 1.41-2.11 | 2.70 (<0.001) | 2.34-3.12 |
| <b>&gt;30</b>                          | 2.11 (<0.001) | 1.83-2.44 | 1 |  | 1.82 (<0.001) | 1.46-2.28 | 1.40 (<0.001) | 1.21-1.62 |
| <b>Number of unique prescribers:</b>   |               |           |   |  |               |           |               |           |
| <b>1</b>                               | 0.31 (<0.001) | 0.27-0.36 | 1 |  | 0.49 (<0.001) | 0.32-0.74 | 2.50 (<0.001) | 1.76-3.56 |
| <b>2</b>                               | 0.51 (<0.001) | 0.44-0.58 | 1 |  | 0.63 (<0.001) | 0.48-0.81 | 2.29 (<0.001) | 1.81-2.90 |
| <b>3</b>                               | 0.60 (<0.001) | 0.52-0.69 | 1 |  | 0.71 (0.004)  | 0.56-0.90 | 2.03 (<0.001) | 1.64-2.52 |
| <b>4</b>                               | 0.75 (<0.001) | 0.64-0.87 | 1 |  | 0.82 (0.12)   | 0.64-1.05 | 2.49 (<0.001) | 2.01-3.08 |
| <b>&gt;5</b>                           | 1.36 (<0.001) | 1.23-1.50 | 1 |  | 1.10 (0.15)   | 0.96-1.26 | 2.01 (<0.001) | 1.82-2.24 |

**Table 3. Risk of all cause death in 2016-2017 among opioid users and subgroups of patients. N=31,998 (continued)**

| Number of unique pharmacies: |               |           |   |               |           |               |           |  |
|------------------------------|---------------|-----------|---|---------------|-----------|---------------|-----------|--|
| 1                            | 0.54 (<0.001) | 0.50-0.60 | 1 | 0.72 (<0.001) | 0.60-0.87 | 1.41 (<0.001) | 1.20-1.66 |  |
| 2                            | 0.65 (<0.001) | 0.59-0.71 | 1 | 0.74 (<0.001) | 0.62-0.87 | 2.09 (<0.001) | 1.82-2.40 |  |
| 3                            | 0.73 (<0.001) | 0.64-0.84 | 1 | 0.78 (0.018)  | 0.63-0.96 | 2.48 (<0.001) | 2.09-2.93 |  |
| 4                            | 0.99 (0.96)   | 0.81-1.21 | 1 | 0.82 (0.18)   | 0.61-1.10 | 2.20 (<0.001) | 1.76-2.76 |  |
| >5                           | 1.30 (0.01)   | 1.06-1.59 | 1 | 1.14 (0.33)   | 0.88-1.48 | 1.81 (<0.001) | 1.47-2.24 |  |

**Note:** OR= odds ratio; 95% CI= 95% confidence interval; Risk interval= seven days before death; control interval= seven-day period one month before death

^benzodiazepine receptor modulator (includes Z-drugs)

**Table 4. Risk of all cause death in 2016-2017 among patients co-prescribed BZDs and opioids stratified by OME (n=31,998)**

| Category                  | <50<br>(reference group) | OME                        |                            |
|---------------------------|--------------------------|----------------------------|----------------------------|
|                           |                          | 50-90                      | >90                        |
|                           | OR (p-value)<br>95% CI   | OR (p-value)<br>95% CI     | OR (p-value)<br>95% CI     |
| <b>Overall population</b> | 1                        | 1.72 (<0.001)<br>1.35-2.19 | 3.13 (<0.001)<br>2.50-3.92 |
| <b>Female</b>             | 1                        | 1.76 (<0.001)<br>1.25-2.48 | 3.22 (<0.001)<br>2.35-4.40 |
| <b>Male</b>               | 1                        | 1.68 (0.003)<br>1.19-2.37  | 3.04 (<0.001)<br>2.20-4.19 |
| <b>Age at death:</b>      |                          |                            |                            |
| <b>18-45</b>              | 1                        | 0.90 (0.83)<br>0.35-2.31   | 2.31 (0.08)<br>0.92-5.85   |
| <b>46-65</b>              | 1                        | 2.19 (<0.001)<br>1.41-3.39 | 2.78 (<0.001)<br>1.84-4.18 |
| <b>&gt;65</b>             | 1                        | 1.60 (0.003)<br>1.18-2.18  | 3.41 (<0.001)<br>2.57-4.52 |

**Note:** BZD: benzodiazepines/Z-drugs; OME: Oral morphine equivalents, <50 OME category is the reference group;

Buprenorphine and methadone were excluded



## References

1. Dowell D. CDC guideline for prescribing opioids for chronic pain. 2016.
2. Sun EC, Dixit A, Humphreys K, Darnall BD, Baker LC, Mackey S. Association between concurrent use of prescription opioids and benzodiazepines and overdose: retrospective analysis. *BMJ*. 2017;356:j760.
3. Park TW, Saitz R, Ganoczy D, Ilgen MA, Bohnert AS. Benzodiazepine prescribing patterns and deaths from drug overdose among US veterans receiving opioid analgesics: case-cohort study. *BMJ*. 2015;350:h2698.
4. Busse JW, Craigie S, Juurlink DN, et al. Guideline for opioid therapy and chronic noncancer pain. *Canadian Medical Association Journal*. 2017;189(18):E659-E666.
5. ismp Canada. Essential Clinical Skills for Opioid Prescribers. 2017; <https://www.ismp-canada.org/download/OpioidStewardship/Opioid-Prescribing-Skills.pdf>. Accessed Nov 2018.
6. Jones JD, Mogali S, Comer SD. Polydrug abuse: a review of opioid and benzodiazepine combination use. *Drug and alcohol dependence*. 2012;125(1-2):8-18.
7. Sharma V, Weir D, Samanani S, et al. Characterisation of concurrent use of prescription opioids and benzodiazepine/Z-drugs in Alberta, Canada: a population-based study. *BMJ open*. 2019;9(9):e030858.
8. Hwang CS, Kang EM, Kornegay CJ, Staffa JA, Jones CM, McAninch JK. Trends in the Concomitant Prescribing of Opioids and Benzodiazepines, 2002-2014. *Am J Prev Med*. 2016;51(2):151-160.
9. Vozoris NT. Benzodiazepine and opioid co-usage in the US population, 1999–2014: an exploratory analysis. *Sleep*. 2019;42(4).
10. Gomes T. *Latest trends in opioid-related deaths in Ontario: 1991 to 2015*. Ontario Drug Policy Research Network; 2017.
11. Manitoba Health. Surveillance of Opioid Misuse and Overdose in Manitoba. [Internet]. 2017; [https://www.gov.mb.ca/health/publichealth/surveillance/docs/opioid/2017/q1\\_opioid.pdf](https://www.gov.mb.ca/health/publichealth/surveillance/docs/opioid/2017/q1_opioid.pdf).
12. Gomes T, Khuu W, Martins D, et al. Contributions of prescribed and non-prescribed opioids to opioid related deaths: population based cohort study in Ontario, Canada. *BMJ*. 2018;362:k3207.
13. World Health Organization. International language for drug utilization research, ATC/DDD. 2020; <https://www.whocc.no/>. Accessed Jun 2020, 2020.
14. Government of Canada. Drug Product Database online query. 2020; <https://health-products.canada.ca/dpd-bdpp/index-eng.jsp>. Accessed June 2020.
15. College of Physicians and Surgeons of Alberta. TPP ALBERTA MEDICATIONS LIST. *Triplicate Prescription Program 2020*; <http://www.cpsa.ca/tpp/tpp-medication-list/>. Accessed Jun 2020.
16. Lorig KR, Ritter P, Stewart AL, et al. Chronic Disease Self-Management Program: 2-Year Health Status and Health Care Utilization Outcomes. *Medical Care*. 2001;39(11):1217-1223.
17. College of Physicians and Surgeons of Alberta. TPP Alberta – OME and DDD Conversion Factors. 2020; <http://www.cpsa.ca/tpp/>. Accessed Jun 2020.
18. Maclure M, Mittleman aMA. Should We Use a Case-Crossover Design? *Annual Review of Public Health*. 2000;21(1):193-221.
19. Hallas J, Pottegård A. Use of self-controlled designs in pharmacoepidemiology. *Journal of Internal Medicine*. 2014;275(6):581-589.

- 1  
2  
3 20. Schneeweiss S, Sturmer T, Maclure M. <Case crossover and case-time-control design\_Pharmacoepi & Drug Safety 1997.pdf>. 1997.
- 4 21. Wright AJ, Gomes T, Mamdani MM, Horn JR, Juurlink DN. The risk of hypotension following co-prescription of macrolide antibiotics and  
5 calcium-channel blockers. *Canadian Medical Association Journal*. 2011;183(3):303-307.
- 6 22. Gomes T, Mamdani MM, Dhalla IA, Paterson JM, Juurlink DN. Opioid Dose and Drug-Related Mortality in Patients With Nonmalignant  
7 Pain Opioid Dose and Drug-related Mortality. *JAMA Internal Medicine*. 2011;171(7):686-691.
- 8 23. Vazan P, Golub A, Bennett AS. Substance use and other mental health disorders among veterans returning to the inner city: Prevalence,  
9 correlates, and rates of unmet treatment need. *Substance use & misuse*. 2013;48(10):880-893.
- 10 24. Lan CW, Fiellin DA, Barry DT, et al. The epidemiology of substance use disorders in US Veterans: A systematic review and analysis of  
11 assessment methods. *The American journal on addictions*. 2016;25(1):7-24.
- 12 25. Wagner TH, Harris KM, Federman B, Dai L, Luna Y, Humphreys K. Prevalence of substance use disorders among veterans and comparable  
13 nonveterans from the National Survey on Drug Use and Health. *Psychological Services*. 2007;4(3):149.
- 14 26. Hernandez I, He M, Brooks MM, Zhang Y. Exposure-Response Association Between Concurrent Opioid and Benzodiazepine Use and Risk  
15 of Opioid-Related Overdose in Medicare Part D Beneficiaries. *JAMA Netw Open*. 2018;1(2):e180919.
- 16 27. Graziottin A, Gardner-Nix J, Stumpf M, Berliner MN. Opioids: How to Improve Compliance and Adherence. *Pain Practice*. 2011;11(6):574-  
17 581.
- 18 28. Abdesselam K, Dann MJ, Alwis R, Laroche J, Ileka-Priouzeau S. At-a-glance - Opioid surveillance: monitoring and responding to the  
19 evolving crisis. *Health Promot Chronic Dis Prev Can*. 2018;38(9):312-316.
- 20  
21  
22  
23  
24  
25  
26  
27  
28  
29  
30  
31  
32  
33  
34  
35  
36  
37  
38  
39  
40  
41  
42  
43  
44  
45  
46  
47

**Figure 1. Risk of all cause hospitalization or emergency department visits among concurrent users of opioids and benzodiazepines by molecule and opioid dose\* using codeine and <50 OME\* as reference groups.**

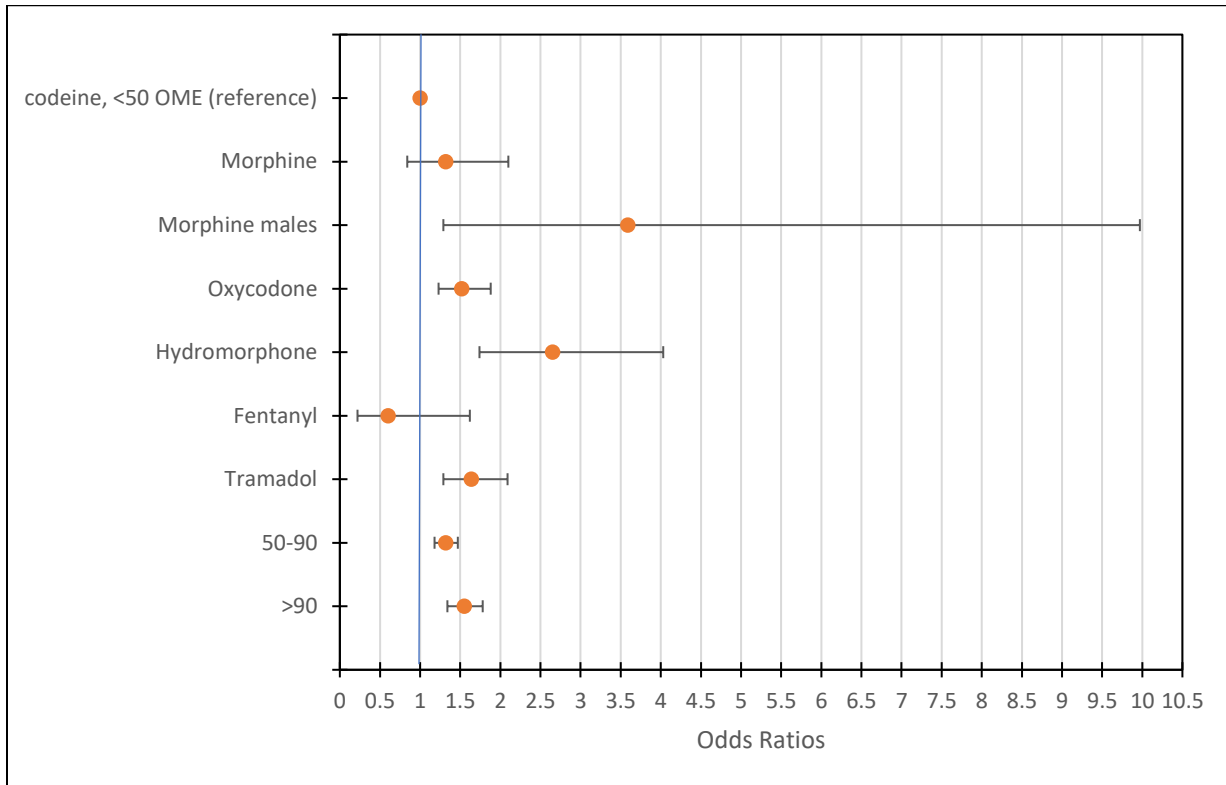

**Note: bars represent 95% confidence intervals**

**\*Dose is oral morphine equivalents (OME) and <50 OME is the reference. Buprenorphine and methadone have been excluded.**

**Figure 2. Risk of hospitalization or emergency department visit comparing specific opioid molecules and opioid doses\* used concurrently with BZDs~ to their respective monotherapy counterparts^**

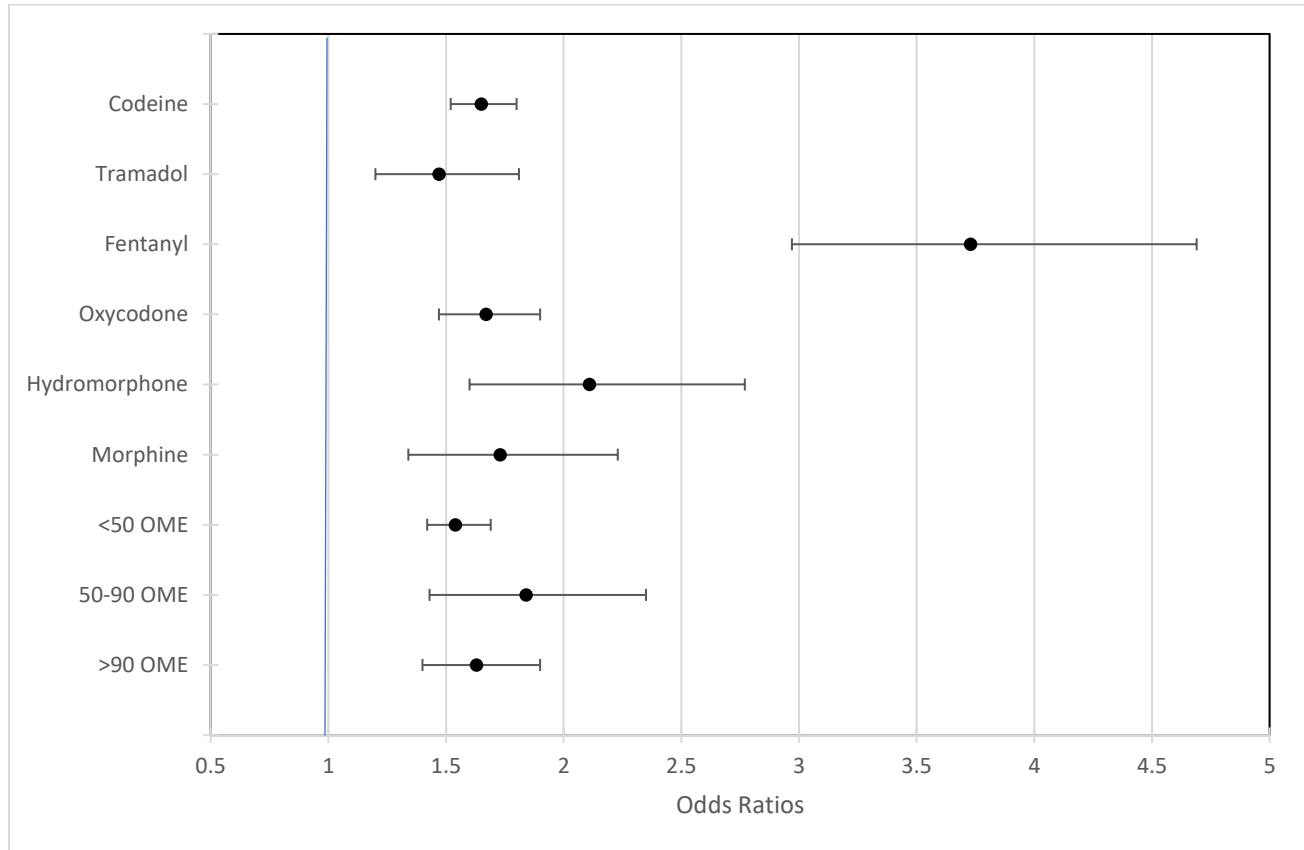

**Note: bars represent 95% confidence intervals**

**\*Opioid dose is oral morphine equivalents (OME); buprenorphine and methadone have been excluded**

**~Benzodiazepine receptor modulator (includes Z-drugs)**

**^For example, the odds ratio plotted for codeine represents the risk of codeine + BZD compared to codeine alone and that of <50 OME represents the risk of <50 OME + BZD compared to <50 OME alone**

## eAppendix

**eTable 1. ATC codes (Anatomical Therapeutic Chemical codes) used to identify opioid and benzodiazepine/Z-drug prescriptions from prescription data (Pharmaceutical Information Network)**

| <b>Opioid</b> | <b>ATC Code</b> | <b>4<sup>th</sup> Level Sub-Group</b>             |
|---------------|-----------------|---------------------------------------------------|
|               | N02AF           | Morphinan derivatives                             |
|               | N02AG           | Opioids in combination with antispasmodics        |
|               | N02AE           | Oripavine derivatives                             |
|               | N02AD           | Benzomorphan derivatives                          |
|               | N02AC           | Diphenylpropylamine derivatives                   |
|               | N02AB           | Phenylpiperidine derivatives                      |
|               | N02AA           | Natural opium alkaloids                           |
|               | N07BC           | Drugs used in opioid dependence                   |
|               | N01AH           | Opioid anesthetics                                |
|               | R05DA           | Opium alkaloids and derivatives                   |
|               | N02AJ           | Opioids in combination with non-opioid analgesics |
|               | N02AX           | Other opioids                                     |
| <b>BZRA</b>   |                 |                                                   |
|               | N03AE           | Benzodiazepine derivatives                        |
|               | N05BA           | Benzodiazepine derivatives                        |
|               | N05CD           | Benzodiazepine derivatives                        |
|               | N05CF           | Benzodiazepine related drugs                      |

BZRA: benzodiazepine/Z-drug

**eFigure 1. Schematic of case crossover design. Each patient's exposure category (opioid only, BZD only, concurrent, none) was coded in both the risk and control periods. These exposures were contrasted using conditional logistic regression.**

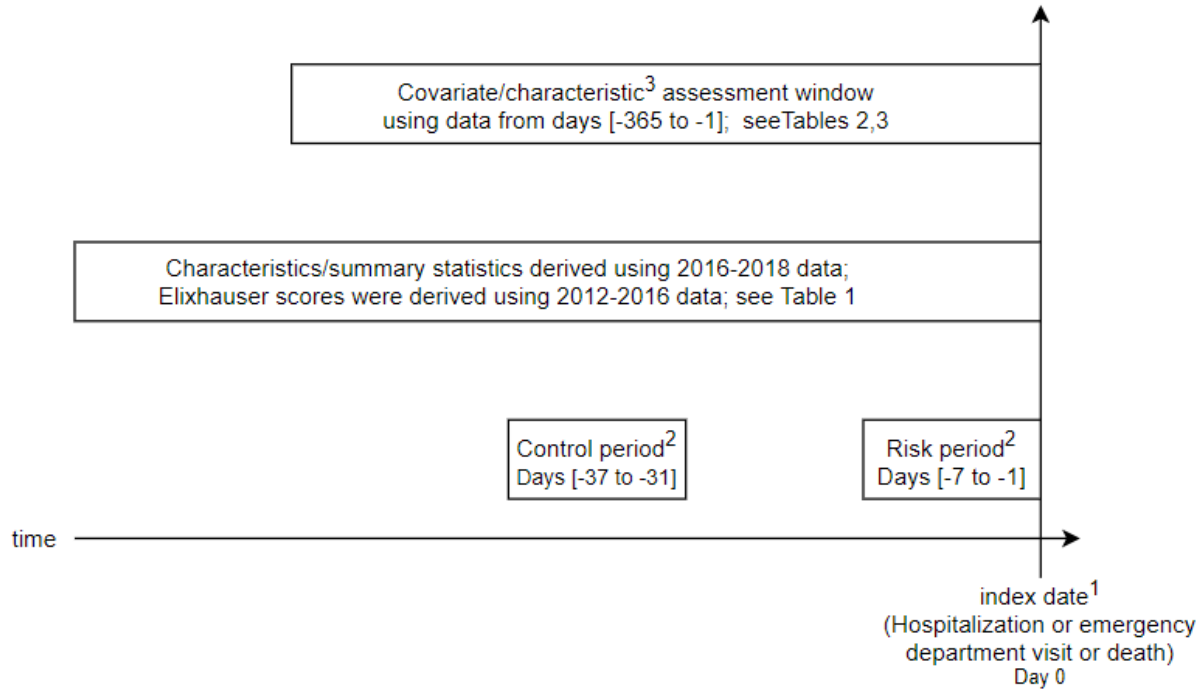

BZD: benzodiazepine

Note:

1. Hospital admission or emergency department visit between Jan 1 2016 to Dec 31, 2018; Death between Jan 1, 2016 and Dec 31, 2017
2. Exposure categories measured in each of risk and control periods: 1) BZD only, 2) opioid only, 3) concurrent BZD and opioid, and 4) none
3. Characteristics include cumulative days of concurrent use, total days of opioid use, number of opioid dispensations, and health care utilization

## STROBE Statement—checklist of items that should be included in reports of observational studies

|                              | Item No | Recommendation                                                                                                                                                                                                                                                                                                                                                                                                                                                         | Page No |
|------------------------------|---------|------------------------------------------------------------------------------------------------------------------------------------------------------------------------------------------------------------------------------------------------------------------------------------------------------------------------------------------------------------------------------------------------------------------------------------------------------------------------|---------|
| <b>Title and abstract</b>    | 1       | (a) Indicate the study's design with a commonly used term in the title or the abstract                                                                                                                                                                                                                                                                                                                                                                                 | 1       |
|                              |         | (b) Provide in the abstract an informative and balanced summary of what was done and what was found                                                                                                                                                                                                                                                                                                                                                                    | 2       |
| <b>Introduction</b>          |         |                                                                                                                                                                                                                                                                                                                                                                                                                                                                        |         |
| Background/rationale         | 2       | Explain the scientific background and rationale for the investigation being reported                                                                                                                                                                                                                                                                                                                                                                                   | 4       |
| Objectives                   | 3       | State specific objectives, including any prespecified hypotheses                                                                                                                                                                                                                                                                                                                                                                                                       | 5       |
| <b>Methods</b>               |         |                                                                                                                                                                                                                                                                                                                                                                                                                                                                        |         |
| Study design                 | 4       | Present key elements of study design early in the paper                                                                                                                                                                                                                                                                                                                                                                                                                | 6       |
| Setting                      | 5       | Describe the setting, locations, and relevant dates, including periods of recruitment, exposure, follow-up, and data collection                                                                                                                                                                                                                                                                                                                                        | 5-6     |
| Participants                 | 6       | (a) <i>Cohort study</i> —Give the eligibility criteria, and the sources and methods of selection of participants. Describe methods of follow-up<br><i>Case-control study</i> —Give the eligibility criteria, and the sources and methods of case ascertainment and control selection. Give the rationale for the choice of cases and controls<br><i>Cross-sectional study</i> —Give the eligibility criteria, and the sources and methods of selection of participants | 5-6     |
|                              |         | (b) <i>Cohort study</i> —For matched studies, give matching criteria and number of exposed and unexposed<br><i>Case-control study</i> —For matched studies, give matching criteria and the number of controls per case                                                                                                                                                                                                                                                 | 5-6     |
| Variables                    | 7       | Clearly define all outcomes, exposures, predictors, potential confounders, and effect modifiers. Give diagnostic criteria, if applicable                                                                                                                                                                                                                                                                                                                               | 6-7     |
| Data sources/<br>measurement | 8*      | For each variable of interest, give sources of data and details of methods of assessment (measurement). Describe comparability of assessment methods if there is more than one group                                                                                                                                                                                                                                                                                   | 5       |
| Bias                         | 9       | Describe any efforts to address potential sources of bias                                                                                                                                                                                                                                                                                                                                                                                                              | 7       |
| Study size                   | 10      | Explain how the study size was arrived at                                                                                                                                                                                                                                                                                                                                                                                                                              | 5       |
| Quantitative variables       | 11      | Explain how quantitative variables were handled in the analyses. If applicable, describe which groupings were chosen and why                                                                                                                                                                                                                                                                                                                                           | 6       |
| Statistical methods          | 12      | (a) Describe all statistical methods, including those used to control for confounding                                                                                                                                                                                                                                                                                                                                                                                  | 7       |
|                              |         | (b) Describe any methods used to examine subgroups and interactions                                                                                                                                                                                                                                                                                                                                                                                                    | 7       |
|                              |         | (c) Explain how missing data were addressed                                                                                                                                                                                                                                                                                                                                                                                                                            |         |
|                              | 7       | (d) <i>Cohort study</i> —If applicable, explain how loss to follow-up was addressed<br><i>Case-control study</i> —If applicable, explain how matching of cases and controls was addressed<br><i>Cross-sectional study</i> —If applicable, describe analytical methods taking account of sampling strategy                                                                                                                                                              | 7       |
|                              |         | (e) Describe any sensitivity analyses                                                                                                                                                                                                                                                                                                                                                                                                                                  | 8       |

Continued on next page

1  
2  
3  
4  
5  
6  
7  
8  
9  
10  
11  
12  
13  
14  
15  
16  
17  
18  
19  
20  
21  
22  
23  
24  
25  
26  
27  
28  
29  
30  
31  
32  
33  
34  
35  
36  
37  
38  
39  
40  
41  
42  
43  
44  
45  
46  
47  
48  
49  
50  
51  
52  
53  
54  
55  
56  
57  
58  
59  
60**Results**

|                  |     |                                                                                                                                                                                                                                                                                                                                                                                                               |     |
|------------------|-----|---------------------------------------------------------------------------------------------------------------------------------------------------------------------------------------------------------------------------------------------------------------------------------------------------------------------------------------------------------------------------------------------------------------|-----|
| Participants     | 13* | (a) Report numbers of individuals at each stage of study—eg numbers potentially eligible, examined for eligibility, confirmed eligible, included in the study, completing follow-up, and analysed<br>(b) Give reasons for non-participation at each stage<br>(c) Consider use of a flow diagram                                                                                                               | 8   |
| Descriptive data | 14* | (a) Give characteristics of study participants (eg demographic, clinical, social) and information on exposures and potential confounders<br>(b) Indicate number of participants with missing data for each variable of interest<br>(c) <i>Cohort study</i> —Summarise follow-up time (eg, average and total amount)                                                                                           | 13  |
| Outcome data     | 15* | <i>Cohort study</i> —Report numbers of outcome events or summary measures over time<br><i>Case-control study</i> —Report numbers in each exposure category, or summary measures of exposure<br><i>Cross-sectional study</i> —Report numbers of outcome events or summary measures                                                                                                                             | 8-9 |
| Main results     | 16  | (a) Give unadjusted estimates and, if applicable, confounder-adjusted estimates and their precision (eg, 95% confidence interval). Make clear which confounders were adjusted for and why they were included<br>(b) Report category boundaries when continuous variables were categorized<br>(c) If relevant, consider translating estimates of relative risk into absolute risk for a meaningful time period | 8-9 |
| Other analyses   | 17  | Report other analyses done—eg analyses of subgroups and interactions, and sensitivity analyses                                                                                                                                                                                                                                                                                                                | 9   |

**Discussion**

|                  |    |                                                                                                                                                                            |       |
|------------------|----|----------------------------------------------------------------------------------------------------------------------------------------------------------------------------|-------|
| Key results      | 18 | Summarise key results with reference to study objectives                                                                                                                   | 10    |
| Limitations      | 19 | Discuss limitations of the study, taking into account sources of potential bias or imprecision. Discuss both direction and magnitude of any potential bias                 | 11    |
| Interpretation   | 20 | Give a cautious overall interpretation of results considering objectives, limitations, multiplicity of analyses, results from similar studies, and other relevant evidence | 11-12 |
| Generalisability | 21 | Discuss the generalisability (external validity) of the study results                                                                                                      | 11-12 |

**Other information**

|         |    |                                                                                                                                                               |   |
|---------|----|---------------------------------------------------------------------------------------------------------------------------------------------------------------|---|
| Funding | 22 | Give the source of funding and the role of the funders for the present study and, if applicable, for the original study on which the present article is based | 1 |
|---------|----|---------------------------------------------------------------------------------------------------------------------------------------------------------------|---|

\*Give information separately for cases and controls in case-control studies and, if applicable, for exposed and unexposed groups in cohort and cross-sectional studies.

**Note:** An Explanation and Elaboration article discusses each checklist item and gives methodological background and published examples of transparent reporting. The STROBE checklist is best used in conjunction with this article (freely available on the Web sites of PLoS Medicine at <http://www.plosmedicine.org/>, Annals of Internal Medicine at <http://www.annals.org/>, and Epidemiology at <http://www.epidem.com/>). Information on the STROBE Initiative is available at [www.strobe-statement.org](http://www.strobe-statement.org).
