# Supplementary material for: Concurrent use of opioids and benzodiazepines/Z-drugs in Alberta, Canada and the risk of hospitalisation and death: a case cross-over study
Source: PubMed Central journal article supplement — BMJ Open. 2020 Nov 20;10(11):e038692. doi: 10.1136/bmjopen-2020-038692 (PMC7682464; doi:10.1136/bmjopen-2020-038692), 2020-11-20
Supplement: bmjopen-2020-038692supp001.pdf [file bmjopen-2020-038692supp001.pdf]

## eAppendix

**eTable 1. ATC codes (Anatomical Therapeutic Chemical codes) used to identify opioid and benzodiazepine/Z-drug prescriptions from prescription data (Pharmaceutical Information Network)**

| <b>Opioid</b> | <b>ATC Code</b> | <b>4<sup>th</sup> Level Sub-Group</b>             |
|---------------|-----------------|---------------------------------------------------|
|               | N02AF           | Morphinan derivatives                             |
|               | N02AG           | Opioids in combination with antispasmodics        |
|               | N02AE           | Oripavine derivatives                             |
|               | N02AD           | Benzomorphan derivatives                          |
|               | N02AC           | Diphenylpropylamine derivatives                   |
|               | N02AB           | Phenylpiperidine derivatives                      |
|               | N02AA           | Natural opium alkaloids                           |
|               | N07BC           | Drugs used in opioid dependence                   |
|               | N01AH           | Opioid anesthetics                                |
|               | R05DA           | Opium alkaloids and derivatives                   |
|               | N02AJ           | Opioids in combination with non-opioid analgesics |
|               | N02AX           | Other opioids                                     |
| <b>BZRA</b>   |                 |                                                   |
|               | N03AE           | Benzodiazepine derivatives                        |
|               | N05BA           | Benzodiazepine derivatives                        |
|               | N05CD           | Benzodiazepine derivatives                        |
|               | N05CF           | Benzodiazepine related drugs                      |

BZRA: benzodiazepine/Z-drug

**eFigure 1. Schematic of case crossover design. Each patient's exposure category (opioid only, BZD only, concurrent, none) was coded in both the risk and control periods. These exposures were contrasted using conditional logistic regression.**

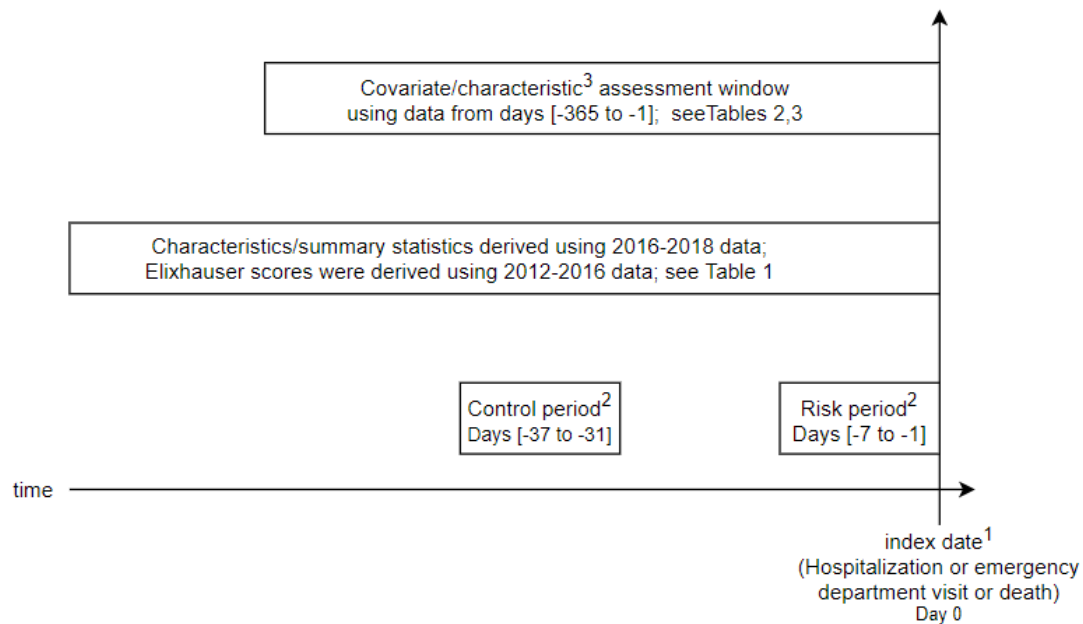

BZD: benzodiazepine

Note:

1. Hospital admission or emergency department visit between Jan 1 2016 to Dec 31, 2018; Death between Jan 1, 2016 and Dec 31, 2017
2. Exposure categories measured in each of risk and control periods: 1) BZD only, 2) opioid only, 3) concurrent BZD and opioid, and 4) none
3. Characteristics include cumulative days of concurrent use, total days of opioid use, number of opioid dispensations, and health care utilization
